# Supplementary material for: Mechanistic insights into the ruthenium-catalyzed site-selective oxidation of alcohols
Source: Royal Society of Chemistry journal article supplement (doi:10.1039/c8qo00329g), 2018-01-01
Supplement: c8qo00329g1.pdf [file c8qo00329g1.pdf]

### The effect of TFE using explicit solvent model

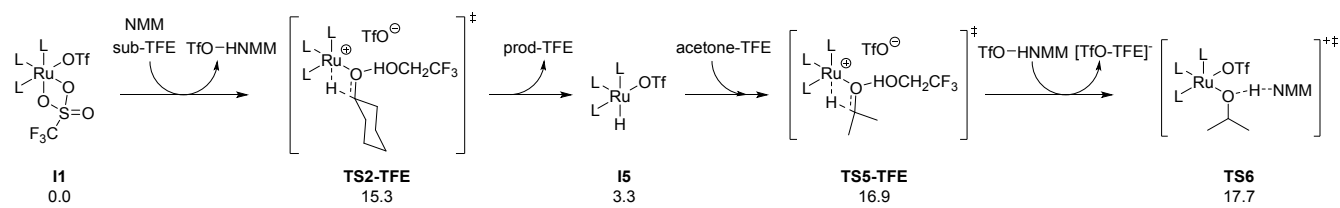

**Scheme S1.** The key intermediates and transition states with explicit TFE molecular. Energies are in kcal mol<sup>-1</sup>.

## Cartesian coordinates of optimized structures, total electronic energies and thermal corrections to Gibbs free energy

83

II, total electronic energy = -3754.5509995, thermal corrections to Gibbs free energy = 0.581916

|   |             |             |             |
|---|-------------|-------------|-------------|
| C | 3.50991500  | -0.09297600 | 1.31191500  |
| H | 3.77842200  | 0.91169000  | 0.98173000  |
| H | 2.83318100  | 0.04291800  | 2.15733000  |
| C | 4.76861600  | -0.83816100 | 1.77472200  |
| H | 4.54085400  | -1.83778900 | 2.15647600  |
| H | 5.23524600  | -0.27690700 | 2.59288100  |
| H | 5.51208900  | -0.93963700 | 0.98067500  |
| C | 3.30258300  | -0.28134500 | -1.64569200 |
| H | 3.00400300  | -0.99739800 | -2.41726600 |
| H | 2.81432500  | 0.66201200  | -1.89982500 |
| C | 4.82465100  | -0.08591600 | -1.67089100 |
| H | 5.15445200  | 0.65318200  | -0.93616400 |
| H | 5.11995500  | 0.28475000  | -2.65966100 |
| H | 5.37265500  | -1.01292500 | -1.49037000 |
| C | 2.78233000  | -2.67858900 | 0.06732500  |
| H | 2.79734200  | -2.90539300 | 1.13787100  |
| H | 1.88964000  | -3.16174000 | -0.32805200 |
| C | 4.01893300  | -3.28045400 | -0.61154900 |
| H | 4.02011900  | -3.09948200 | -1.69053400 |
| H | 4.01635200  | -4.36663900 | -0.46265100 |
| H | 4.95412600  | -2.89445600 | -0.20058300 |
| C | 0.84269700  | -1.55606900 | 3.19769900  |
| H | 1.81880300  | -1.89246700 | 2.83957600  |
| H | 0.95927600  | -0.50360500 | 3.47640600  |
| C | 0.44197100  | -2.39162900 | 4.42075700  |
| H | -0.51823300 | -2.08160100 | 4.84212000  |
| H | 1.19845300  | -2.27480800 | 5.20527700  |
| H | 0.37997200  | -3.45768300 | 4.18221100  |
| C | -0.43831500 | -3.44095000 | 1.37544900  |
| H | -0.45295700 | -3.55263000 | 0.29085200  |
| H | 0.51028100  | -3.87206400 | 1.71279500  |
| C | -1.61077000 | -4.22551100 | 1.97703100  |
| H | -1.61439900 | -4.19882000 | 3.06998600  |
| H | -1.53451000 | -5.27593900 | 1.67318500  |
| H | -2.57686500 | -3.85110700 | 1.62542700  |
| C | -1.94100700 | -1.15568800 | 2.53746500  |
| H | -2.69367700 | -1.10409500 | 1.74908100  |
| H | -2.21842400 | -1.98377900 | 3.19600700  |
| C | -1.91942300 | 0.15471000  | 3.33484600  |

|    |             |             |             |
|----|-------------|-------------|-------------|
| H  | -1.24504000 | 0.09539600  | 4.19446900  |
| H  | -2.92239900 | 0.36535500  | 3.72043300  |
| H  | -1.61396000 | 0.99802000  | 2.71318300  |
| C  | 0.38572600  | -2.79030100 | -2.49894100 |
| H  | 1.40296000  | -2.44800000 | -2.70763300 |
| H  | 0.46642000  | -3.54432500 | -1.71016800 |
| C  | -0.21199800 | -3.43895700 | -3.75455500 |
| H  | -1.20493400 | -3.85715300 | -3.56634200 |
| H  | 0.43364200  | -4.26273900 | -4.08005600 |
| H  | -0.29117200 | -2.73530000 | -4.58814900 |
| C  | -2.24270600 | -2.09365500 | -1.45628800 |
| H  | -2.06701200 | -3.15332200 | -1.23933900 |
| H  | -2.60479800 | -1.63645800 | -0.53586700 |
| C  | -3.31828200 | -1.95245800 | -2.54154900 |
| H  | -3.56379000 | -0.90398300 | -2.72637300 |
| H  | -4.23395400 | -2.45398300 | -2.20744900 |
| H  | -3.02153100 | -2.40961000 | -3.48939500 |
| C  | -0.79403200 | -0.23309700 | -3.24250800 |
| H  | -1.40621300 | -0.78693100 | -3.96095500 |
| H  | -1.39885500 | 0.60738800  | -2.89327600 |
| C  | 0.47944300  | 0.26663800  | -3.93237600 |
| H  | 1.07826000  | 0.89274500  | -3.26896000 |
| H  | 0.20482000  | 0.87437700  | -4.80259600 |
| H  | 1.10669000  | -0.55486600 | -4.29355600 |
| C  | -4.49466300 | 0.89854100  | 0.30215400  |
| C  | 2.58658200  | 3.47251900  | 0.12675700  |
| O  | -1.87746000 | 0.78875300  | 0.20331900  |
| O  | -3.09957700 | 1.66714300  | -1.80259600 |
| O  | -2.98711400 | 3.03287300  | 0.29885200  |
| O  | 0.90352500  | 1.73668600  | 1.35546300  |
| O  | 0.03735300  | 3.92741500  | 0.43524600  |
| O  | 0.68921700  | 1.97578000  | -1.05648100 |
| F  | -4.59397100 | -0.38594100 | -0.08707300 |
| F  | -4.53573400 | 0.92676000  | 1.64419100  |
| F  | -5.56733600 | 1.55645400  | -0.16380400 |
| F  | 3.44937500  | 2.64423100  | -0.48179600 |
| F  | 3.03875100  | 3.73582000  | 1.35786100  |
| F  | 2.53831200  | 4.60826000  | -0.57459400 |
| P  | 2.47724300  | -0.83818500 | -0.06403300 |
| P  | -0.31716000 | -1.60082700 | 1.73562200  |
| P  | -0.54940300 | -1.34935200 | -1.77052200 |
| S  | -2.93921600 | 1.70675800  | -0.33439900 |
| S  | 0.86188300  | 2.73845600  | 0.22976500  |
| Ru | 0.26208800  | -0.10767100 | 0.03775600  |

TS1, total electronic energy = -3430.935248, thermal corrections to Gibbs free energy = 0.886845

|   |             |             |             |
|---|-------------|-------------|-------------|
| C | -1.57118100 | 2.49136200  | 1.87591200  |
| H | -0.71280300 | 3.06699200  | 1.52739100  |
| H | -2.30116700 | 2.52259100  | 1.06733900  |
| C | -2.19035700 | 3.15017800  | 3.11548400  |
| H | -3.08665600 | 2.62442800  | 3.45743100  |
| H | -2.49207200 | 4.17198800  | 2.85649000  |
| H | -1.49299300 | 3.21755700  | 3.95287900  |
| C | 0.69867600  | 0.82137800  | 2.77489300  |
| H | 0.85547700  | -0.14685100 | 3.26088000  |
| H | 1.38006800  | 0.86384900  | 1.92299500  |
| C | 1.01795800  | 1.96676600  | 3.74400900  |
| H | 0.91616800  | 2.94284300  | 3.26112300  |
| H | 2.05809900  | 1.87696900  | 4.07840000  |
| H | 0.38581900  | 1.95697700  | 4.63430100  |
| C | -2.10600300 | -0.05394800 | 3.26245500  |
| H | -3.11871000 | 0.29335200  | 3.03175100  |
| H | -2.09407900 | -1.12345000 | 3.06609000  |
| C | -1.79161400 | 0.16289800  | 4.74941000  |
| H | -0.80179400 | -0.22070900 | 5.01367900  |
| H | -2.52552600 | -0.38668700 | 5.35030900  |
| H | -1.84099600 | 1.21135700  | 5.04795400  |
| C | -2.51040200 | 2.16524500  | -1.78284900 |
| H | -2.18469800 | 2.84272400  | -0.99278700 |
| H | -1.66349500 | 2.08671100  | -2.47061300 |
| C | -3.73134300 | 2.75231600  | -2.50093200 |
| H | -4.06599700 | 2.12966600  | -3.33611800 |
| H | -3.47165400 | 3.73535300  | -2.91109600 |
| H | -4.57825400 | 2.89534400  | -1.82297100 |
| C | -4.22628400 | 0.67701300  | 0.08579000  |
| H | -4.05967700 | 0.06571600  | 0.97458200  |
| H | -4.22610400 | 1.71899200  | 0.42405600  |
| C | -5.59619600 | 0.33428700  | -0.51401300 |
| H | -5.83483100 | 0.94486700  | -1.38876000 |
| H | -6.37409600 | 0.51470900  | 0.23690200  |
| H | -5.66288100 | -0.71757700 | -0.80802100 |
| C | -3.30009000 | -0.53267200 | -2.43763100 |
| H | -3.55878400 | -1.52310600 | -2.05506000 |
| H | -4.23237500 | -0.08527200 | -2.79398300 |
| C | -2.30868700 | -0.64525800 | -3.60047300 |
| H | -2.11294600 | 0.32829400  | -4.06066900 |
| H | -2.71627100 | -1.30154200 | -4.37752900 |
| H | -1.34830500 | -1.06429100 | -3.28537100 |

|    |             |             |             |
|----|-------------|-------------|-------------|
| C  | -3.25429000 | -2.63555900 | 0.99908800  |
| H  | -3.36520100 | -2.02308000 | 1.89520600  |
| H  | -3.88689700 | -2.17632600 | 0.23239000  |
| C  | -3.75166500 | -4.05822500 | 1.28634400  |
| H  | -3.78341500 | -4.67403100 | 0.38371500  |
| H  | -4.77194200 | -4.01024800 | 1.68399100  |
| H  | -3.13492000 | -4.57253300 | 2.02924500  |
| C  | -1.58939300 | -3.43820800 | -1.22392800 |
| H  | -2.60650300 | -3.29009100 | -1.59926300 |
| H  | -0.92732200 | -2.95319500 | -1.94315900 |
| C  | -1.28311800 | -4.94276700 | -1.19217700 |
| H  | -0.25558600 | -5.15406600 | -0.88494600 |
| H  | -1.41334100 | -5.35153200 | -2.20094500 |
| H  | -1.95130800 | -5.49452200 | -0.52645100 |
| C  | -0.48022900 | -3.52540700 | 1.48334300  |
| H  | -0.84680300 | -4.54737300 | 1.35179000  |
| H  | 0.53014500  | -3.49061300 | 1.06979900  |
| C  | -0.44598500 | -3.19360600 | 2.97707600  |
| H  | -0.02849900 | -2.20274700 | 3.17223500  |
| H  | 0.18115600  | -3.92565100 | 3.49869500  |
| H  | -1.44130700 | -3.23865400 | 3.43033100  |
| C  | 0.73746400  | 4.37454700  | -0.78090900 |
| O  | 0.31596600  | 1.80796300  | -0.43712100 |
| O  | 0.92016500  | 2.59245100  | -2.73346300 |
| O  | 2.64733600  | 2.59617600  | -0.91104100 |
| F  | 0.94237300  | 4.55448600  | 0.53707200  |
| F  | -0.55406800 | 4.63237600  | -1.04125900 |
| F  | 1.48424900  | 5.26684000  | -1.44646700 |
| P  | -0.98298200 | 0.71953800  | 1.98997900  |
| P  | -2.70006300 | 0.48657200  | -0.99613400 |
| P  | -1.50652300 | -2.43722600 | 0.37210100  |
| S  | 1.22232200  | 2.64725900  | -1.28907400 |
| Ru | -0.66934200 | -0.29317600 | -0.08026500 |
| O  | 1.50614900  | -1.06989000 | -0.08250600 |
| C  | 1.57365100  | -1.44010500 | -1.45782400 |
| C  | 2.56874800  | -0.62584100 | -2.30532400 |
| C  | 1.86363800  | -2.93872100 | -1.66922400 |
| H  | 0.57104600  | -1.23462500 | -1.90593600 |
| C  | 2.48161500  | -0.99966500 | -3.79516300 |
| H  | 3.58476800  | -0.83531900 | -1.95226400 |
| H  | 2.40130400  | 0.44147200  | -2.17102600 |
| C  | 1.78970800  | -3.34702700 | -3.15054400 |
| H  | 2.87663500  | -3.14289100 | -1.29808400 |
| H  | 1.18222700  | -3.54457800 | -1.06877800 |

|   |            |             |             |
|---|------------|-------------|-------------|
| C | 2.72946600 | -2.49777900 | -4.01800600 |
| H | 3.20262200 | -0.40389800 | -4.36832500 |
| H | 1.48614600 | -0.73532700 | -4.18075000 |
| H | 2.03043300 | -4.41226000 | -3.25497000 |
| H | 0.75880400 | -3.22521200 | -3.51227900 |
| H | 2.60488600 | -2.75410700 | -5.07741600 |
| H | 3.77171000 | -2.73259100 | -3.75819900 |
| C | 4.88493100 | -1.55907900 | 0.44472300  |
| C | 5.35645500 | -0.13921800 | 0.14530900  |
| C | 4.34666800 | 0.69529500  | 2.06650500  |
| C | 3.84412400 | -0.68666700 | 2.46363600  |
| H | 6.31360800 | -0.18825900 | -0.38164100 |
| H | 5.65754300 | -2.08774000 | 1.01470400  |
| H | 4.69572500 | -2.11147500 | -0.47788000 |
| H | 4.55148800 | 1.27424400  | 2.97122400  |
| H | 3.59760000 | 1.23401900  | 1.46874300  |
| H | 4.59282800 | -1.17189000 | 3.10060300  |
| H | 2.90696500 | -0.62714500 | 3.01577100  |
| H | 4.63560900 | 0.38830500  | -0.49318400 |
| N | 3.63071900 | -1.56479100 | 1.26765700  |
| O | 5.56994900 | 0.59931400  | 1.34358100  |
| C | 3.34220100 | -2.94731700 | 1.73060300  |
| H | 2.43703700 | -2.93599900 | 2.33898600  |
| H | 3.19581300 | -3.59592900 | 0.86699600  |
| H | 4.17798100 | -3.32227800 | 2.32907500  |
| H | 2.63262400 | -1.24647300 | 0.60126500  |

93

I2, total electronic energy = -3103.4761355, thermal corrections to Gibbs free energy = 0.711856

|   |             |             |            |
|---|-------------|-------------|------------|
| C | -0.83046400 | -1.53541500 | 2.48077900 |
| H | -1.71221600 | -0.88798700 | 2.51622700 |
| H | -0.97557600 | -2.18023400 | 1.61275000 |
| C | -0.74502400 | -2.39942600 | 3.74533200 |
| H | 0.10271800  | -3.09066400 | 3.70936100 |
| H | -1.65517700 | -3.00576800 | 3.82734300 |
| H | -0.66191000 | -1.80756600 | 4.65948000 |
| C | 0.39592100  | 1.10271400  | 3.10093100 |
| H | 1.39945000  | 1.51032200  | 3.25371700 |
| H | -0.12036700 | 1.80471300  | 2.44178200 |
| C | -0.33054100 | 0.98331800  | 4.44584000 |
| H | -1.35309000 | 0.61207600  | 4.32681100 |
| H | -0.39962400 | 1.97667600  | 4.90609500 |
| H | 0.18682000  | 0.33080200  | 5.15409200 |
| C | 2.12673200  | -1.28178500 | 2.66923700 |
| H | 2.01840600  | -2.33635100 | 2.39486500 |

|   |             |             |             |
|---|-------------|-------------|-------------|
| H | 2.95510800  | -0.89318200 | 2.07013300  |
| C | 2.47807100  | -1.15332900 | 4.15753200  |
| H | 2.63577700  | -0.11096100 | 4.44991300  |
| H | 3.41157100  | -1.69269700 | 4.35743900  |
| H | 1.70900700  | -1.57438700 | 4.80862800  |
| C | -0.07461000 | -3.33637700 | -0.97707300 |
| H | -0.28551900 | -3.48759300 | 0.08772100  |
| H | -0.98487700 | -2.92382700 | -1.41697600 |
| C | 0.25850300  | -4.68483500 | -1.62675100 |
| H | 0.46960200  | -4.58903000 | -2.69669500 |
| H | -0.59811800 | -5.36233100 | -1.52568600 |
| H | 1.11586000  | -5.17385700 | -1.15449600 |
| C | 2.72260700  | -2.87007000 | -0.36764700 |
| H | 3.30426300  | -2.14006500 | 0.19585300  |
| H | 2.33639400  | -3.58416700 | 0.36946400  |
| C | 3.64978700  | -3.59140600 | -1.35516700 |
| H | 3.13372000  | -4.36137900 | -1.93430100 |
| H | 4.46088500  | -4.08205100 | -0.80384000 |
| H | 4.11147300  | -2.89504300 | -2.06206400 |
| C | 1.56881100  | -1.82188300 | -2.86541900 |
| H | 2.48219900  | -1.22357700 | -2.95477000 |
| H | 1.80096800  | -2.81011000 | -3.27473000 |
| C | 0.43703900  | -1.17299200 | -3.67093400 |
| H | -0.49190800 | -1.74619400 | -3.60602800 |
| H | 0.71755900  | -1.10111200 | -4.72837400 |
| H | 0.21867000  | -0.15880700 | -3.31811100 |
| C | 4.13807400  | 0.34820700  | -0.59995300 |
| H | 4.37210300  | -0.05810400 | 0.39008100  |
| H | 3.97766600  | -0.51050500 | -1.25789600 |
| C | 5.32075600  | 1.17268700  | -1.12814500 |
| H | 5.16740700  | 1.47978800  | -2.16704100 |
| H | 6.23392100  | 0.56690600  | -1.09853800 |
| H | 5.50465100  | 2.07285100  | -0.53464800 |
| C | 2.27995700  | 1.95483300  | -2.17535100 |
| H | 2.75060300  | 1.24292600  | -2.86369300 |
| H | 1.20635300  | 1.92497100  | -2.38446000 |
| C | 2.79803100  | 3.37296000  | -2.44598500 |
| H | 2.27571300  | 4.11697500  | -1.83765600 |
| H | 2.62519400  | 3.62932600  | -3.49783700 |
| H | 3.87004900  | 3.47111500  | -2.25395500 |
| C | 2.85570200  | 2.64699500  | 0.68090800  |
| H | 3.33639300  | 3.44139800  | 0.10258300  |
| H | 1.86770700  | 3.00976700  | 0.97645900  |
| C | 3.72371700  | 2.31834300  | 1.90310600  |

|    |             |             |             |
|----|-------------|-------------|-------------|
| H  | 3.35655500  | 1.45337600  | 2.46138300  |
| H  | 3.73279900  | 3.17249100  | 2.58990300  |
| H  | 4.76144400  | 2.11312900  | 1.62423800  |
| C  | -3.93469700 | -1.85078900 | 0.13144700  |
| O  | -1.75009500 | -0.53076400 | -0.34809600 |
| O  | -2.80189200 | -1.76922600 | -2.25463600 |
| O  | -3.87578700 | 0.31034400  | -1.37446400 |
| F  | -4.15153800 | -1.13979500 | 1.25120500  |
| F  | -3.25614200 | -2.96201300 | 0.46572400  |
| F  | -5.12399000 | -2.22120800 | -0.36739500 |
| P  | 0.59914500  | -0.41756200 | 2.03337500  |
| P  | 1.20584000  | -1.97837300 | -1.03828300 |
| P  | 2.49599500  | 1.21833600  | -0.45947100 |
| S  | -2.99352900 | -0.84339600 | -1.11825900 |
| Ru | 0.48735600  | 0.12384700  | -0.17613400 |
| O  | -0.17690000 | 2.09195500  | 0.21517500  |
| C  | -1.39759800 | 2.61684100  | -0.24376900 |
| C  | -2.29287200 | 3.05312800  | 0.93668500  |
| C  | -1.15944300 | 3.82724100  | -1.17367000 |
| H  | -1.96424600 | 1.87015200  | -0.81937400 |
| C  | -3.60919300 | 3.70396700  | 0.47889500  |
| H  | -1.72319800 | 3.76680900  | 1.55185500  |
| H  | -2.50111100 | 2.18332000  | 1.57283400  |
| C  | -2.46942300 | 4.48085100  | -1.64592900 |
| H  | -0.55493100 | 4.56789400  | -0.62818200 |
| H  | -0.56212900 | 3.50736600  | -2.03750700 |
| C  | -3.35304200 | 4.89253900  | -0.45912200 |
| H  | -4.19802300 | 4.02568000  | 1.34807000  |
| H  | -4.21434300 | 2.95324600  | -0.04803100 |
| H  | -2.25372900 | 5.35072300  | -2.28020200 |
| H  | -3.02368400 | 3.76904000  | -2.27500200 |
| H  | -4.30363000 | 5.30839300  | -0.81758100 |
| H  | -2.85191600 | 5.69514600  | 0.10199400  |

93

TS2, total electronic energy = -3103.4605601, thermal corrections to Gibbs free energy = 0.705292

|   |             |             |             |
|---|-------------|-------------|-------------|
| C | 1.36733100  | -1.72902600 | -1.44509800 |
| H | 1.30550700  | -1.17756600 | -2.39025500 |
| H | 1.77501300  | -1.02400200 | -0.71487500 |
| C | 2.33918800  | -2.90864200 | -1.57816500 |
| H | 2.44588100  | -3.45423100 | -0.63574400 |
| H | 3.32746100  | -2.52167600 | -1.84776300 |
| H | 2.03264200  | -3.61888400 | -2.34939100 |
| C | -1.28514200 | -2.56028600 | -2.49509700 |
| H | -2.18945300 | -3.08749400 | -2.16914300 |



|   |             |             |             |
|---|-------------|-------------|-------------|
| H | -1.61957200 | -1.62607200 | -2.95260700 |
| C | -0.53174600 | -3.38977800 | -3.54318600 |
| H | 0.33999500  | -2.85298100 | -3.92909300 |
| H | -1.19530200 | -3.58644100 | -4.39400600 |
| H | -0.19368400 | -4.35457000 | -3.15917400 |
| C | -0.39458700 | -3.52768300 | 0.17613300  |
| H | 0.40813900  | -3.35226700 | 0.90229100  |
| H | -1.33096600 | -3.47964200 | 0.73984600  |
| C | -0.26535000 | -4.92950900 | -0.43436600 |
| H | -1.09693200 | -5.15173200 | -1.10965800 |
| H | -0.28890200 | -5.67679900 | 0.36786900  |
| H | 0.66703300  | -5.06698800 | -0.98569100 |
| C | 1.36424100  | -0.14940000 | 2.07318800  |
| H | 1.54737200  | -1.21633600 | 1.90001700  |
| H | 1.74698000  | 0.37122200  | 1.18886800  |
| C | 2.15292200  | 0.33144300  | 3.29983200  |
| H | 2.04388800  | 1.40849300  | 3.45621600  |
| H | 3.21767100  | 0.13336100  | 3.13874200  |
| H | 1.85511900  | -0.17448200 | 4.22100400  |
| C | -1.15348700 | -1.36514400 | 3.08679200  |
| H | -2.22357500 | -1.15925700 | 3.20568300  |
| H | -1.08137800 | -2.26309000 | 2.46914500  |
| C | -0.52470400 | -1.64188500 | 4.45848200  |
| H | 0.51809000  | -1.95948800 | 4.37026200  |
| H | -1.07152800 | -2.45372800 | 4.95251100  |
| H | -0.56229600 | -0.77328800 | 5.12234800  |
| C | -0.83480400 | 1.47085200  | 3.20458300  |
| H | -1.90409700 | 1.43616400  | 3.43644700  |
| H | -0.30808200 | 1.25336700  | 4.13908200  |
| C | -0.45353500 | 2.86642100  | 2.70963000  |
| H | 0.60738400  | 2.93369700  | 2.44753400  |
| H | -0.64766600 | 3.60800700  | 3.49329100  |
| H | -1.03368700 | 3.15185700  | 1.82819200  |
| C | -3.78298900 | -1.83793100 | 0.52710700  |
| H | -3.55808400 | -2.41733600 | -0.37513600 |
| H | -3.07976400 | -2.17428500 | 1.29230100  |
| C | -5.21820300 | -2.12281400 | 0.98691200  |
| H | -5.44507100 | -1.63615800 | 1.93977000  |
| H | -5.34478900 | -3.20192400 | 1.13320800  |
| H | -5.96475200 | -1.80383300 | 0.25352400  |
| C | -3.98877900 | 0.96257700  | 1.50935000  |
| H | -3.74404000 | 0.42697100  | 2.43335600  |
| H | -3.38063400 | 1.87184800  | 1.51068200  |
| C | -5.47372300 | 1.35290700  | 1.50162700  |

|    |             |             |             |
|----|-------------|-------------|-------------|
| H  | -5.72299600 | 1.98459200  | 0.64425300  |
| H  | -5.69748400 | 1.92936400  | 2.40693600  |
| H  | -6.14119200 | 0.48827900  | 1.48971300  |
| C  | -4.46728200 | 0.32622900  | -1.27978100 |
| H  | -5.47132100 | 0.09380300  | -0.90923200 |
| H  | -4.43866100 | 1.41135500  | -1.41308600 |
| C  | -4.23126200 | -0.37831900 | -2.61671900 |
| H  | -3.26034500 | -0.10905400 | -3.03765200 |
| H  | -5.00952500 | -0.08314000 | -3.33032400 |
| H  | -4.27704700 | -1.46725200 | -2.51602500 |
| C  | 5.19770700  | -0.47040900 | 0.53865700  |
| O  | 3.61176500  | 1.48473400  | -0.18645000 |
| O  | 6.06091600  | 1.70199500  | -0.64813600 |
| O  | 4.67761000  | 0.08820600  | -1.97079200 |
| F  | 4.16014400  | -1.32654500 | 0.65076100  |
| F  | 5.41970700  | 0.05801500  | 1.75914700  |
| F  | 6.28324700  | -1.18933500 | 0.20170900  |
| P  | -0.40914400 | -2.02673500 | -0.93621800 |
| P  | -0.49967000 | 0.04293500  | 2.04774000  |
| P  | -3.30007000 | -0.08386500 | 0.11653100  |
| S  | 4.84947300  | 0.85576600  | -0.71565800 |
| Ru | -1.06770700 | 0.21160200  | -0.21930000 |
| O  | -1.04989900 | 0.82368600  | -2.29063600 |
| C  | -0.92236700 | 2.00688300  | -1.75146200 |
| C  | 0.49102500  | 2.58971100  | -1.70364900 |
| C  | -2.01005300 | 3.04034400  | -2.03962400 |
| H  | -1.24383800 | 1.88370600  | -0.08143400 |
| C  | 0.61758700  | 3.93275500  | -0.97159800 |
| H  | 0.76443800  | 2.72353900  | -2.76224400 |
| H  | 1.19139500  | 1.85044400  | -1.30149400 |
| C  | -1.85625000 | 4.36082800  | -1.27461800 |
| H  | -1.91363100 | 3.23925200  | -3.11827100 |
| H  | -2.99536400 | 2.59890500  | -1.89071300 |
| C  | -0.44417600 | 4.94093000  | -1.43122300 |
| H  | 1.62481300  | 4.33371100  | -1.13314600 |
| H  | 0.51508200  | 3.77047600  | 0.10767900  |
| H  | -2.60724500 | 5.07408700  | -1.63432700 |
| H  | -2.06566900 | 4.19368600  | -0.20934800 |
| H  | -0.35178300 | 5.87164200  | -0.85889100 |
| H  | -0.27316100 | 5.19987400  | -2.48579500 |

93

I3, total electronic energy = -3103.4658872, thermal corrections to Gibbs free energy = 0.706182

|   |             |             |            |
|---|-------------|-------------|------------|
| C | -1.43077200 | -1.58776400 | 1.53249200 |
| H | -1.33685100 | -1.02551100 | 2.46879000 |

|   |             |             |             |
|---|-------------|-------------|-------------|
| H | -1.82745700 | -0.88072700 | 0.79785100  |
| C | -2.43705900 | -2.73394700 | 1.69793800  |
| H | -2.57967700 | -3.28457700 | 0.76345100  |
| H | -3.40740500 | -2.31203100 | 1.98062100  |
| H | -2.13918600 | -3.44639700 | 2.47040700  |
| C | 1.21804100  | -2.56421300 | 2.50648200  |
| H | 2.07059800  | -3.14418500 | 2.13316300  |
| H | 1.63141000  | -1.66640200 | 2.97112000  |
| C | 0.44999400  | -3.36712600 | 3.56445400  |
| H | -0.37116500 | -2.78409000 | 3.99227200  |
| H | 1.12809700  | -3.62502200 | 4.38716500  |
| H | 0.03641600  | -4.29936900 | 3.17360600  |
| C | 0.22336200  | -3.40788800 | -0.16245200 |
| H | -0.58231400 | -3.18045900 | -0.87096200 |
| H | 1.15185100  | -3.38642600 | -0.74098100 |
| C | 0.04330200  | -4.81870700 | 0.41375300  |
| H | 0.87357200  | -5.09274000 | 1.07149400  |
| H | 0.02462600  | -5.54612700 | -0.40677700 |
| H | -0.88645000 | -4.93077400 | 0.97507200  |
| C | -1.36658000 | 0.01951700  | -2.03025000 |
| H | -1.56549500 | -1.03739100 | -1.81850700 |
| H | -1.71837100 | 0.57322900  | -1.15340400 |
| C | -2.17097000 | 0.47623100  | -3.25589000 |
| H | -2.05158000 | 1.54655100  | -3.44542600 |
| H | -3.23449600 | 0.29536700  | -3.07039900 |
| H | -1.89581500 | -0.05961100 | -4.16684700 |
| C | 1.10526400  | -1.25921400 | -3.08881800 |
| H | 2.17607900  | -1.07386200 | -3.22959300 |
| H | 1.02905200  | -2.14756500 | -2.45832600 |
| C | 0.44555300  | -1.53978100 | -4.44487100 |
| H | -0.59681600 | -1.85034100 | -4.33283300 |
| H | 0.97808700  | -2.35839800 | -4.94300300 |
| H | 0.47598200  | -0.67567300 | -5.11481200 |
| C | 0.84771200  | 1.59476000  | -3.20825800 |
| H | 1.92364600  | 1.56438200  | -3.40994300 |
| H | 0.34610200  | 1.36722500  | -4.15450700 |
| C | 0.44435300  | 2.99185400  | -2.73103900 |
| H | -0.62064000 | 3.05255300  | -2.48521000 |
| H | 0.64286200  | 3.72517500  | -3.52112800 |
| H | 1.01072500  | 3.29273700  | -1.84585500 |
| C | 3.74310200  | -1.90236600 | -0.58315000 |
| H | 3.44442400  | -2.45824300 | 0.31209100  |
| H | 3.03596200  | -2.18273500 | -1.36731600 |
| C | 5.16341200  | -2.30404100 | -1.00126600 |

|    |             |             |             |
|----|-------------|-------------|-------------|
| H  | 5.45268700  | -1.84763200 | -1.95220000 |
| H  | 5.20939500  | -3.39131800 | -1.13352500 |
| H  | 5.91251700  | -2.03413000 | -0.25094400 |
| C  | 4.12231800  | 0.86867300  | -1.60562600 |
| H  | 3.81889300  | 0.34237200  | -2.51743900 |
| H  | 3.57828300  | 1.81694700  | -1.60279300 |
| C  | 5.63000400  | 1.15580000  | -1.63717900 |
| H  | 5.94001900  | 1.78408600  | -0.79715300 |
| H  | 5.87125900  | 1.70029700  | -2.55757900 |
| H  | 6.23834200  | 0.24848200  | -1.62349200 |
| C  | 4.61346700  | 0.22482600  | 1.19107100  |
| H  | 5.60509300  | 0.02825200  | 0.77098300  |
| H  | 4.57566300  | 1.29912500  | 1.39427200  |
| C  | 4.43664500  | -0.57026500 | 2.48707400  |
| H  | 3.47674200  | -0.34878900 | 2.95591100  |
| H  | 5.23475500  | -0.30530600 | 3.19056000  |
| H  | 4.50079800  | -1.64943600 | 2.31426600  |
| C  | -5.27009600 | -0.49906400 | -0.59620800 |
| O  | -3.79956000 | 1.53534500  | 0.15241900  |
| O  | -6.27283400 | 1.65502800  | 0.51052700  |
| O  | -4.87815800 | 0.12713800  | 1.91977600  |
| F  | -4.18479200 | -1.29884300 | -0.66602000 |
| F  | -5.48640200 | -0.00342200 | -1.83182400 |
| F  | -6.32414200 | -1.27117800 | -0.27717200 |
| P  | 0.32547600  | -1.93937300 | 0.99000500  |
| P  | 0.49692800  | 0.17172300  | -2.05823400 |
| P  | 3.40029700  | -0.11381400 | -0.18256400 |
| S  | -5.02941700 | 0.86414100  | 0.64350400  |
| Ru | 1.19452800  | 0.33054400  | 0.20309500  |
| O  | 1.36421600  | 0.63481500  | 2.36082500  |
| C  | 1.12063400  | 1.81751900  | 1.89376400  |
| C  | -0.33887300 | 2.26617700  | 1.85324900  |
| C  | 2.14664800  | 2.91840700  | 2.12523100  |
| H  | 1.58423300  | 1.79369200  | -0.34341100 |
| C  | -0.59065300 | 3.62955200  | 1.19097400  |
| H  | -0.67157300 | 2.29147500  | 2.90337500  |
| H  | -0.94080600 | 1.48059000  | 1.37394800  |
| C  | 1.84525500  | 4.24746300  | 1.42148600  |
| H  | 2.12582100  | 3.08859800  | 3.21412900  |
| H  | 3.14801000  | 2.55474400  | 1.89052000  |
| C  | 0.40003100  | 4.69724800  | 1.67136400  |
| H  | -1.62189600 | 3.94021600  | 1.39314200  |
| H  | -0.50174800 | 3.52798800  | 0.10307700  |
| H  | 2.55184500  | 5.00856900  | 1.77331200  |

|   |            |            |            |
|---|------------|------------|------------|
| H | 2.00952400 | 4.13771700 | 0.34132700 |
| H | 0.20375300 | 5.64684500 | 1.15948500 |
| H | 0.25505700 | 4.88095700 | 2.74565900 |

93

TS3, total electronic energy = -3103.4636531, thermal corrections to Gibbs free energy = 0.706657

|   |             |             |             |
|---|-------------|-------------|-------------|
| C | 1.37746400  | -1.31636200 | -1.82941300 |
| H | 1.32789800  | -0.54138000 | -2.60257300 |
| H | 1.80068700  | -0.82662400 | -0.94732500 |
| C | 2.32669600  | -2.43988600 | -2.26428100 |
| H | 2.42128600  | -3.21165100 | -1.49427500 |
| H | 3.32362800  | -2.01705400 | -2.42879500 |
| H | 2.00844800  | -2.92287300 | -3.19114100 |
| C | -1.30023300 | -1.79997600 | -3.03822100 |
| H | -2.18259200 | -2.42535500 | -2.85659700 |
| H | -1.67054500 | -0.78994300 | -3.22805800 |
| C | -0.54637000 | -2.29538300 | -4.27959400 |
| H | 0.31051000  | -1.65545800 | -4.51149200 |
| H | -1.21605200 | -2.26819800 | -5.14799400 |
| H | -0.18425900 | -3.32069900 | -4.17529200 |
| C | -0.43324700 | -3.43267100 | -0.72696400 |
| H | 0.35102000  | -3.47370200 | 0.03860000  |
| H | -1.38424200 | -3.51602700 | -0.19127700 |
| C | -0.30784600 | -4.62644400 | -1.68307000 |
| H | -1.12384400 | -4.64500700 | -2.41175500 |
| H | -0.36327700 | -5.55982100 | -1.10971900 |
| H | 0.63646600  | -4.63238100 | -2.23114100 |
| C | 1.31076000  | -0.83662800 | 2.01089800  |
| H | 1.43231800  | -1.81097700 | 1.52312700  |
| H | 1.72319100  | -0.09628700 | 1.31683400  |
| C | 2.12095500  | -0.79147500 | 3.31488300  |
| H | 2.07380800  | 0.19237200  | 3.78991600  |
| H | 3.17319800  | -0.99092300 | 3.08734600  |
| H | 1.79097600  | -1.53388600 | 4.04488400  |
| C | -1.28075400 | -2.14845800 | 2.65967700  |
| H | -2.33731600 | -1.92739300 | 2.84699800  |
| H | -1.25729800 | -2.82548100 | 1.80271600  |
| C | -0.67654400 | -2.85122300 | 3.88217000  |
| H | 0.34479100  | -3.19263800 | 3.69185400  |
| H | -1.27591800 | -3.73665500 | 4.12488800  |
| H | -0.66399600 | -2.21302500 | 4.77059400  |
| C | -0.78976100 | 0.52747400  | 3.57923500  |
| H | -1.86510100 | 0.52501200  | 3.78503200  |
| H | -0.31170800 | 0.00635600  | 4.41536400  |
| C | -0.27444600 | 1.96713500  | 3.50407100  |

|    |             |             |             |
|----|-------------|-------------|-------------|
| H  | 0.79042300  | 2.01142000  | 3.25297000  |
| H  | -0.40600700 | 2.46094000  | 4.47383700  |
| H  | -0.81813200 | 2.54811400  | 2.75464900  |
| C  | -3.88398100 | -1.80152900 | -0.00875100 |
| H  | -3.59973600 | -2.07317100 | -1.03093900 |
| H  | -3.25099000 | -2.39930400 | 0.65279400  |
| C  | -5.35913000 | -2.14508000 | 0.23300400  |
| H  | -5.64844900 | -1.98951100 | 1.27623400  |
| H  | -5.53122000 | -3.20280500 | 0.00108700  |
| H  | -6.03315600 | -1.55874200 | -0.39892800 |
| C  | -4.02442900 | 0.50723000  | 1.85298400  |
| H  | -3.83713900 | -0.32056400 | 2.54588800  |
| H  | -3.38532800 | 1.33240300  | 2.17763700  |
| C  | -5.49245600 | 0.94705700  | 1.94660100  |
| H  | -5.68314700 | 1.85125500  | 1.36132000  |
| H  | -5.73103700 | 1.17963400  | 2.99115600  |
| H  | -6.19165600 | 0.17594100  | 1.61487100  |
| C  | -4.41932100 | 0.88150800  | -0.99823600 |
| H  | -5.45081600 | 0.67636800  | -0.69393300 |
| H  | -4.25379500 | 1.94915300  | -0.82018000 |
| C  | -4.24736800 | 0.54905900  | -2.48269100 |
| H  | -3.23966800 | 0.78445400  | -2.82993100 |
| H  | -4.95956800 | 1.13342600  | -3.07720300 |
| H  | -4.44468200 | -0.50859700 | -2.68535600 |
| C  | 5.18065500  | -0.61453100 | 0.45892700  |
| O  | 3.45037700  | 1.33576800  | 0.21853600  |
| O  | 5.87958900  | 1.85676900  | -0.07404200 |
| O  | 4.65863500  | 0.55542200  | -1.83059100 |
| F  | 4.20919800  | -1.53933400 | 0.31079000  |
| F  | 5.35001200  | -0.41306500 | 1.78117600  |
| F  | 6.32072000  | -1.13994900 | -0.02352500 |
| P  | -0.40748700 | -1.68660500 | -1.39764800 |
| P  | -0.53724400 | -0.54061100 | 2.06979700  |
| P  | -3.32166800 | -0.03435900 | 0.20009700  |
| S  | 4.74594200  | 0.96850700  | -0.41127700 |
| Ru | -1.08401900 | 0.27945600  | -0.01889700 |
| O  | -0.96389500 | 1.30586100  | -2.11138300 |
| C  | -0.73167700 | 2.44251500  | -1.63040200 |
| C  | 0.68205000  | 2.87443500  | -1.30552000 |
| C  | -1.77540000 | 3.53615400  | -1.69690900 |
| H  | -1.33505800 | 1.70775800  | 0.74611700  |
| C  | 0.79007300  | 4.00548400  | -0.26868100 |
| H  | 1.07868200  | 3.23366800  | -2.27025700 |
| H  | 1.29122300  | 2.01015200  | -1.02634400 |

|   |             |            |             |
|---|-------------|------------|-------------|
| C | -1.62490300 | 4.64434000 | -0.64297900 |
| H | -1.62126800 | 3.97690800 | -2.69609200 |
| H | -2.77348900 | 3.09658900 | -1.70306000 |
| C | -0.18091600 | 5.15492400 | -0.56400600 |
| H | 1.82368900  | 4.36695200 | -0.24661200 |
| H | 0.57557400  | 3.59946500 | 0.72741300  |
| H | -2.31194400 | 5.46270700 | -0.88594600 |
| H | -1.92819000 | 4.25343000 | 0.33654900  |
| H | -0.09695900 | 5.92411300 | 0.21252600  |
| H | 0.09128900  | 5.63353400 | -1.51525100 |

93

I4, total electronic energy = -3103.4776387, thermal corrections to Gibbs free energy = 0.708663

|   |             |             |             |
|---|-------------|-------------|-------------|
| C | -0.49640700 | -1.81981200 | 2.58745100  |
| H | -1.43407500 | -1.26632200 | 2.71507900  |
| H | -0.64408800 | -2.42937700 | 1.69384100  |
| C | -0.25292500 | -2.73694500 | 3.79208600  |
| H | 0.65310700  | -3.33832200 | 3.66611700  |
| H | -1.09227300 | -3.43635400 | 3.89432200  |
| H | -0.16608500 | -2.19000300 | 4.73391400  |
| C | 0.46808300  | 0.88752800  | 3.27853400  |
| H | 1.40092600  | 1.46346800  | 3.31068800  |
| H | -0.25826600 | 1.51303100  | 2.75246400  |
| C | -0.04310200 | 0.62386300  | 4.70084500  |
| H | -1.00439100 | 0.10067600  | 4.69199500  |
| H | -0.20001200 | 1.57916900  | 5.21756100  |
| H | 0.65437800  | 0.03669700  | 5.30234500  |
| C | 2.41869200  | -1.26069500 | 2.64492100  |
| H | 2.42318900  | -2.29387600 | 2.27606700  |
| H | 3.17462100  | -0.73094100 | 2.05958200  |
| C | 2.83735300  | -1.22306200 | 4.12061700  |
| H | 2.90029000  | -0.19617900 | 4.49385600  |
| H | 3.83360800  | -1.66927500 | 4.23088500  |
| H | 2.15601500  | -1.77707500 | 4.76963200  |
| C | 1.11821900  | -3.24349700 | -0.66454200 |
| H | 1.61690300  | -3.41984600 | 0.29674400  |
| H | 0.05976600  | -3.09685100 | -0.44339800 |
| C | 1.27719000  | -4.46798400 | -1.57675300 |
| H | 0.71243000  | -4.35558000 | -2.50669300 |
| H | 0.88409900  | -5.35525100 | -1.06522500 |
| H | 2.31651800  | -4.67663500 | -1.84011500 |
| C | 3.58116600  | -1.65466800 | -0.91963900 |
| H | 4.00516200  | -0.76803800 | -1.40154600 |
| H | 3.70248300  | -1.50586400 | 0.15634200  |
| C | 4.37438200  | -2.89580000 | -1.34903100 |

|    |             |             |             |
|----|-------------|-------------|-------------|
| H  | 4.06538200  | -3.78882700 | -0.79865900 |
| H  | 5.43937800  | -2.73825200 | -1.13944700 |
| H  | 4.28219000  | -3.10552700 | -2.41892300 |
| C  | 1.73548700  | -1.70900400 | -3.11094200 |
| H  | 2.33814900  | -0.86940300 | -3.47595500 |
| H  | 2.28069600  | -2.62138400 | -3.37432200 |
| C  | 0.36851000  | -1.70563400 | -3.80230700 |
| H  | -0.29305400 | -2.48724600 | -3.41735200 |
| H  | 0.49345900  | -1.87295500 | -4.87890600 |
| H  | -0.14236700 | -0.74827400 | -3.66987400 |
| C  | 3.61017800  | 1.71631400  | 0.65507700  |
| H  | 3.19650000  | 1.74265400  | 1.66936700  |
| H  | 4.04961200  | 0.72237100  | 0.53121900  |
| C  | 4.70312200  | 2.78176000  | 0.50530900  |
| H  | 5.20509800  | 2.71568500  | -0.46455300 |
| H  | 5.46848800  | 2.64090200  | 1.27809800  |
| H  | 4.31251500  | 3.79819800  | 0.61465600  |
| C  | 2.93815400  | 1.86297900  | -2.20131800 |
| H  | 3.81442600  | 1.20630700  | -2.15625700 |
| H  | 2.22789300  | 1.38463300  | -2.87954500 |
| C  | 3.34487400  | 3.22206600  | -2.78701500 |
| H  | 2.47800900  | 3.86975300  | -2.95031700 |
| H  | 3.82221700  | 3.06739900  | -3.76220000 |
| H  | 4.05623800  | 3.76326600  | -2.15749900 |
| C  | 1.54488800  | 3.53358100  | -0.25327000 |
| H  | 2.32924000  | 4.19698000  | -0.62866300 |
| H  | 0.68302600  | 3.66881200  | -0.91336000 |
| C  | 1.19243100  | 3.94652300  | 1.17973100  |
| H  | 0.40588300  | 3.32363400  | 1.60803100  |
| H  | 0.84049100  | 4.98508300  | 1.19041200  |
| H  | 2.06287200  | 3.89341200  | 1.84160500  |
| C  | -3.82483500 | -1.67050500 | 0.24930500  |
| O  | -3.06114300 | -0.43025600 | -1.94966900 |
| O  | -1.33110100 | -1.22657200 | -0.29672700 |
| O  | -2.54691200 | -2.87275600 | -1.71820700 |
| F  | -5.03882200 | -1.91496800 | -0.26870200 |
| F  | -3.89830200 | -0.53210500 | 0.96485900  |
| F  | -3.51832000 | -2.67000900 | 1.09281500  |
| P  | 0.77799200  | -0.53365700 | 2.09708600  |
| P  | 1.73896200  | -1.57019700 | -1.24549700 |
| P  | 2.13670000  | 1.77381700  | -0.49633800 |
| S  | -2.55579400 | -1.52945100 | -1.10510600 |
| Ru | 0.50122500  | 0.15901600  | -0.31035200 |
| O  | -1.06666200 | 1.57361300  | 0.47829500  |



|   |             |            |             |
|---|-------------|------------|-------------|
| C | -1.92679200 | 2.36153000 | 0.06925600  |
| C | -2.95027200 | 2.91255600 | 1.03786000  |
| C | -1.99400000 | 2.88131700 | -1.34413900 |
| H | 0.14297000  | 0.62378600 | -1.82968700 |
| C | -4.37455700 | 2.93831400 | 0.44551600  |
| H | -2.63976200 | 3.94526100 | 1.25847100  |
| H | -2.90299600 | 2.34618200 | 1.97177600  |
| C | -3.43460700 | 2.93706500 | -1.89728200 |
| H | -1.59395300 | 3.90631100 | -1.30039900 |
| H | -1.33158200 | 2.28814100 | -1.97681200 |
| C | -4.39842400 | 3.62671900 | -0.92412000 |
| H | -5.04392100 | 3.44391800 | 1.15018100  |
| H | -4.73601500 | 1.90769100 | 0.34432700  |
| H | -3.42009400 | 3.45723700 | -2.86164600 |
| H | -3.77173400 | 1.91252500 | -2.08539900 |
| H | -5.41567600 | 3.61043900 | -1.33285200 |
| H | -4.11920400 | 4.68357300 | -0.80872800 |

76

I5, total electronic energy = -2793.6947998, thermal corrections to Gibbs free energy = 0.56062

|   |             |             |             |
|---|-------------|-------------|-------------|
| C | -1.70196700 | 1.74549300  | 1.86772400  |
| H | -2.47710500 | 1.83353800  | 1.10018500  |
| H | -1.78224800 | 0.72170600  | 2.24220400  |
| C | -1.97204300 | 2.72146600  | 3.01953200  |
| H | -1.24025700 | 2.61088600  | 3.82600200  |
| H | -2.95994000 | 2.51408700  | 3.44925600  |
| H | -1.96660100 | 3.76601100  | 2.70002700  |
| C | -0.26569600 | 3.23689100  | -0.25369700 |
| H | 0.75164200  | 3.55510800  | -0.51106600 |
| H | -0.67429900 | 2.78147200  | -1.16300700 |
| C | -1.12763000 | 4.45222100  | 0.11172800  |
| H | -2.16218800 | 4.16347400  | 0.32022200  |
| H | -1.14990700 | 5.15160800  | -0.73307000 |
| H | -0.74560900 | 4.99523200  | 0.97897200  |
| C | 1.16632100  | 2.39169700  | 2.23115400  |
| H | 0.94195900  | 1.81613900  | 3.13771100  |
| H | 2.13957300  | 2.03705200  | 1.88296800  |
| C | 1.27833300  | 3.88439400  | 2.56714700  |
| H | 1.54951400  | 4.47516000  | 1.68654800  |
| H | 2.06737600  | 4.03378700  | 3.31432600  |
| H | 0.35355700  | 4.29505400  | 2.97798500  |
| C | -0.52936600 | -1.81642800 | 2.47174700  |
| H | -0.42517500 | -0.94367500 | 3.12722200  |
| H | -1.44041200 | -1.65707900 | 1.88912000  |
| C | -0.67325500 | -3.09230900 | 3.31376500  |

|   |             |             |             |
|---|-------------|-------------|-------------|
| H | -0.87676400 | -3.96919700 | 2.69292600  |
| H | -1.52037400 | -2.97778900 | 4.00083100  |
| H | 0.21140600  | -3.30643600 | 3.91784700  |
| C | 2.36547100  | -1.22570600 | 2.27150200  |
| H | 3.22117600  | -1.28856600 | 1.59076300  |
| H | 2.24309300  | -0.16620700 | 2.51354000  |
| C | 2.66613200  | -2.01302900 | 3.55358000  |
| H | 1.88357600  | -1.88150400 | 4.30617200  |
| H | 3.60347100  | -1.65091800 | 3.99248800  |
| H | 2.78593900  | -3.08474300 | 3.36870900  |
| C | 1.26498200  | -3.45376100 | 0.80211300  |
| H | 2.22747400  | -3.43944200 | 0.27983900  |
| H | 1.42934900  | -3.98992100 | 1.74316500  |
| C | 0.22221700  | -4.19039800 | -0.04287600 |
| H | -0.76432400 | -4.19520900 | 0.43181900  |
| H | 0.52571500  | -5.23381800 | -0.18717300 |
| H | 0.11305000  | -3.73137200 | -1.02891400 |
| C | 3.50601100  | 1.46267300  | -0.52210700 |
| H | 2.86690000  | 2.35301700  | -0.52264100 |
| H | 3.63944400  | 1.18663700  | 0.53012800  |
| C | 4.86774000  | 1.79417200  | -1.14374000 |
| H | 5.57394800  | 0.96496600  | -1.04470100 |
| H | 5.30703100  | 2.65877000  | -0.63182400 |
| H | 4.78891300  | 2.04938700  | -2.20516900 |
| C | 3.61424700  | -1.36129000 | -1.37012100 |
| H | 4.16384700  | -1.39348000 | -0.42201900 |
| H | 2.96722100  | -2.24206600 | -1.38527900 |
| C | 4.59510500  | -1.44641700 | -2.54865100 |
| H | 4.07055800  | -1.52700000 | -3.50518200 |
| H | 5.21403700  | -2.34501100 | -2.44067600 |
| H | 5.26948300  | -0.58875100 | -2.60546800 |
| C | 2.26860500  | 0.60392700  | -3.04919900 |
| H | 3.25776400  | 0.83736400  | -3.45643100 |
| H | 1.91105600  | -0.28991500 | -3.57223100 |
| C | 1.30688300  | 1.76968700  | -3.29943400 |
| H | 0.29532400  | 1.54005500  | -2.94860400 |
| H | 1.24152700  | 1.98186000  | -4.37288400 |
| H | 1.63841700  | 2.68683100  | -2.80232800 |
| C | -4.39236100 | -0.20128600 | -0.79657700 |
| O | -1.90295300 | -0.58797100 | -0.19658100 |
| O | -3.02580600 | -2.29239500 | -1.65898300 |
| O | -2.44670100 | -0.02755700 | -2.58028200 |
| F | -4.31141800 | 1.12019300  | -0.56053900 |
| F | -4.76261800 | -0.81003300 | 0.33983800  |

|    |             |             |             |
|----|-------------|-------------|-------------|
| F  | -5.34621800 | -0.40424000 | -1.71726900 |
| P  | -0.07007900 | 1.80843400  | 0.94796600  |
| P  | 0.87595200  | -1.68228500 | 1.24063000  |
| P  | 2.45359000  | 0.10666700  | -1.25846000 |
| S  | -2.76386900 | -0.86474800 | -1.40500800 |
| Ru | 0.33872700  | -0.24356500 | -0.42364500 |
| H  | 0.38542600  | -1.50838900 | -1.46689500 |

86

I6, total electronic energy = -2986.8026414, thermal corrections to Gibbs free energy = 0.643377

|   |             |             |             |
|---|-------------|-------------|-------------|
| C | 1.54480100  | -0.13316800 | 2.67729700  |
| H | 2.21972700  | -0.90779800 | 2.29640300  |
| H | 1.82272300  | 0.77672900  | 2.14131600  |
| C | 1.76996000  | 0.07516700  | 4.17959500  |
| H | 1.14216400  | 0.87985500  | 4.57549000  |
| H | 2.81383600  | 0.36384300  | 4.35608300  |
| H | 1.57513500  | -0.82438300 | 4.76814100  |
| C | -0.27479800 | -2.43574200 | 2.31874600  |
| H | -1.34645200 | -2.66748600 | 2.34669800  |
| H | 0.10842300  | -2.87769700 | 1.39487000  |
| C | 0.44004600  | -3.08341800 | 3.51180700  |
| H | 1.52041300  | -2.91217200 | 3.47433100  |
| H | 0.28400100  | -4.16938200 | 3.48832500  |
| H | 0.07473300  | -2.72079200 | 4.47521000  |
| C | -1.35274200 | 0.16545400  | 3.25307500  |
| H | -1.01754100 | 1.19994900  | 3.39730500  |
| H | -2.30420300 | 0.23082900  | 2.71912300  |
| C | -1.60626300 | -0.50371300 | 4.61053500  |
| H | -2.00433900 | -1.51617600 | 4.49090100  |
| H | -2.35302800 | 0.07341700  | 5.17008600  |
| H | -0.70819800 | -0.56489400 | 5.22870500  |
| C | 0.27542600  | 3.12505100  | 0.94810600  |
| H | -0.02424700 | 2.92397800  | 1.98440200  |
| H | 1.21773600  | 2.59736600  | 0.79016000  |
| C | 0.49764700  | 4.63026500  | 0.74387000  |
| H | 0.88801400  | 4.84967700  | -0.25408000 |
| H | 1.23981000  | 4.98962100  | 1.46738900  |
| H | -0.40962100 | 5.22189500  | 0.88560100  |
| C | -2.61216400 | 2.63147600  | 0.70929500  |
| H | -3.38721500 | 2.24768600  | 0.03842000  |
| H | -2.65590100 | 2.01431300  | 1.61052200  |
| C | -2.93233700 | 4.08573300  | 1.07883100  |
| H | -2.25519500 | 4.47061900  | 1.84641600  |
| H | -3.94946700 | 4.14404400  | 1.48499600  |
| H | -2.88810500 | 4.75818800  | 0.21686600  |

|    |             |             |             |
|----|-------------|-------------|-------------|
| C  | -1.12017000 | 3.27646600  | -1.65356200 |
| H  | -2.02469600 | 2.93353100  | -2.16892300 |
| H  | -1.31460700 | 4.30564500  | -1.33393500 |
| C  | 0.06612700  | 3.25130400  | -2.62233500 |
| H  | 1.00295600  | 3.54338100  | -2.13820300 |
| H  | -0.11172500 | 3.94816300  | -3.45012400 |
| H  | 0.21193800  | 2.25491500  | -3.04847700 |
| C  | -3.73748000 | -0.93260100 | 0.54926800  |
| H  | -3.26436400 | -1.59268700 | 1.28491500  |
| H  | -3.78326400 | 0.05658600  | 1.01403400  |
| C  | -5.15905500 | -1.42083700 | 0.24475600  |
| H  | -5.69860000 | -0.72349000 | -0.40287100 |
| H  | -5.72997300 | -1.50656300 | 1.17726000  |
| H  | -5.16888100 | -2.40432100 | -0.23516700 |
| C  | -3.45174900 | 0.22934700  | -2.13854200 |
| H  | -3.99228700 | 0.99944400  | -1.57642700 |
| H  | -2.68234400 | 0.74993000  | -2.71337800 |
| C  | -4.41300100 | -0.46546300 | -3.11283000 |
| H  | -3.88706800 | -1.15762400 | -3.77750100 |
| H  | -4.89360600 | 0.28975100  | -3.74646100 |
| H  | -5.20726100 | -1.02125300 | -2.60776400 |
| C  | -2.58200300 | -2.50202300 | -1.59835500 |
| H  | -3.58715800 | -2.64036700 | -2.00683600 |
| H  | -1.89807100 | -2.50298800 | -2.45250300 |
| C  | -2.26502900 | -3.66962100 | -0.65804100 |
| H  | -1.26570500 | -3.59305500 | -0.22738500 |
| H  | -2.32001700 | -4.61551300 | -1.21027300 |
| H  | -2.98420000 | -3.73324600 | 0.16491600  |
| C  | 4.27652200  | -0.19391800 | -0.15929100 |
| O  | 2.93781500  | -0.08853200 | -2.42573000 |
| O  | 1.81900800  | 0.65050600  | -0.29117200 |
| O  | 3.58593600  | 2.06845200  | -1.32070400 |
| F  | 5.45161600  | -0.25795800 | -0.80606200 |
| F  | 3.87519800  | -1.45278000 | 0.09869500  |
| F  | 4.47700300  | 0.42723600  | 1.01467600  |
| P  | -0.15339600 | -0.58874500 | 2.02333300  |
| P  | -0.98064300 | 2.22190900  | -0.11455500 |
| P  | -2.51144800 | -0.78433500 | -0.85618000 |
| S  | 3.01820200  | 0.71251700  | -1.18898600 |
| Ru | -0.38849700 | -0.00392400 | -0.41234100 |
| H  | -0.38691900 | 0.29639600  | -2.01352800 |
| C  | 1.10459900  | -2.60418700 | -1.73478300 |
| O  | 0.61814200  | -1.98017200 | -0.78566700 |
| C  | 2.03645000  | -3.75440400 | -1.45703800 |

|   |            |             |             |
|---|------------|-------------|-------------|
| H | 3.05135400 | -3.46241900 | -1.75258500 |
| H | 2.03256200 | -4.01602400 | -0.39761000 |
| H | 1.76511500 | -4.62501700 | -2.06352000 |
| C | 0.80777100 | -2.30568200 | -3.17457200 |
| H | 1.74089300 | -2.26275500 | -3.74356300 |
| H | 0.21902800 | -3.13556600 | -3.58645500 |
| H | 0.26174100 | -1.36959800 | -3.27810500 |

86

TS4, total electronic energy = -2986.784981, thermal corrections to Gibbs free energy = 0.640157

|   |             |             |             |
|---|-------------|-------------|-------------|
| C | 1.35059200  | 2.08626200  | -0.52526800 |
| H | 1.31688400  | 2.63167300  | 0.42474900  |
| H | 1.78753000  | 1.11157700  | -0.28832200 |
| C | 2.27109800  | 2.80469200  | -1.51974400 |
| H | 2.34863500  | 2.26070200  | -2.46616600 |
| H | 3.27802500  | 2.86359100  | -1.09257700 |
| H | 1.93946400  | 3.82209800  | -1.74014900 |
| C | -1.33309200 | 3.36113200  | -0.61423800 |
| H | -2.24613600 | 3.33407000  | -1.22118000 |
| H | -1.65421300 | 3.28800600  | 0.42786000  |
| C | -0.60161900 | 4.69470900  | -0.81713000 |
| H | 0.28475000  | 4.76770900  | -0.17969400 |
| H | -1.26795900 | 5.52176100  | -0.54285100 |
| H | -0.28869900 | 4.85313000  | -1.85152700 |
| C | -0.50637000 | 1.55267000  | -2.81521000 |
| H | 0.28516800  | 0.83602900  | -3.06589800 |
| H | -1.45295700 | 1.03892700  | -3.01144400 |
| C | -0.42009700 | 2.78262900  | -3.72833500 |
| H | -1.24319300 | 3.47939400  | -3.54322000 |
| H | -0.49291000 | 2.46489000  | -4.77562800 |
| H | 0.51868200  | 3.32858100  | -3.61429400 |
| C | 1.27082800  | -1.73538300 | -1.11804200 |
| H | 1.34633000  | -1.00575700 | -1.93265300 |
| H | 1.71411600  | -1.25800000 | -0.23743100 |
| C | 2.08300800  | -2.99506800 | -1.45461100 |
| H | 2.07538900  | -3.71618500 | -0.63258400 |
| H | 3.12631300  | -2.71083500 | -1.62570900 |
| H | 1.72450300  | -3.50390000 | -2.35201800 |
| C | -1.37753600 | -2.08636100 | -2.43562200 |
| H | -2.42886900 | -2.30227400 | -2.21596000 |
| H | -1.35990500 | -1.09360100 | -2.89242700 |
| C | -0.83516900 | -3.11846000 | -3.43249100 |
| H | 0.17014700  | -2.86190700 | -3.77759500 |
| H | -1.48498400 | -3.14661700 | -4.31514600 |
| H | -0.80649800 | -4.12994400 | -3.01687600 |

|    |             |             |             |
|----|-------------|-------------|-------------|
| C  | -0.75164600 | -3.61792700 | -0.07465100 |
| H  | -1.82674300 | -3.82477300 | -0.05019100 |
| H  | -0.31761600 | -4.30672300 | -0.80708800 |
| C  | -0.13633500 | -3.87465900 | 1.30416900  |
| H  | 0.93422600  | -3.64559100 | 1.32683900  |
| H  | -0.25424800 | -4.93026700 | 1.57462000  |
| H  | -0.62161400 | -3.27297500 | 2.07769900  |
| C  | -3.95048600 | 0.43868900  | -1.36755100 |
| H  | -3.66123700 | 1.49513100  | -1.36801600 |
| H  | -3.34396000 | -0.04375100 | -2.13946700 |
| C  | -5.43791500 | 0.30406700  | -1.71720700 |
| H  | -5.73476200 | -0.74135300 | -1.84095700 |
| H  | -5.63809700 | 0.81442400  | -2.66674400 |
| H  | -6.08683700 | 0.75587200  | -0.96067800 |
| C  | -4.04956100 | -1.96388300 | 0.37830100  |
| H  | -3.88801200 | -2.42395300 | -0.60290200 |
| H  | -3.39664200 | -2.49271800 | 1.07752700  |
| C  | -5.50857000 | -2.15685200 | 0.81618800  |
| H  | -5.66972700 | -1.82318500 | 1.84539700  |
| H  | -5.75640800 | -3.22418300 | 0.77828200  |
| H  | -6.22093500 | -1.63188000 | 0.17570400  |
| C  | -4.37809100 | 0.69137400  | 1.50639400  |
| H  | -5.42353100 | 0.47301000  | 1.26548000  |
| H  | -4.18136600 | 0.22864400  | 2.47907400  |
| C  | -4.17520600 | 2.20716300  | 1.58143800  |
| H  | -3.15467100 | 2.46257100  | 1.87428600  |
| H  | -4.85843200 | 2.63544900  | 2.32425500  |
| H  | -4.38983400 | 2.69175000  | 0.62349900  |
| C  | 5.12843700  | -0.30567300 | -0.51657200 |
| O  | 3.41989600  | -0.58807100 | 1.44690400  |
| O  | 5.85795100  | -0.47921700 | 1.99641600  |
| O  | 4.65213600  | 1.58193200  | 1.24357800  |
| F  | 4.14757900  | 0.09428900  | -1.35246000 |
| F  | 5.28765600  | -1.63368100 | -0.68418200 |
| F  | 6.26671800  | 0.29474700  | -0.90689300 |
| P  | -0.44156900 | 1.75277800  | -0.95663100 |
| P  | -0.55988200 | -1.89673400 | -0.76864000 |
| P  | -3.33862700 | -0.23203500 | 0.26301300  |
| S  | 4.72171000  | 0.10299400  | 1.24975500  |
| Ru | -1.09882900 | -0.10456300 | 0.57422400  |
| H  | -1.36443900 | -1.22139100 | 1.74069200  |
| C  | -0.64587700 | 0.76434400  | 3.12529100  |
| O  | -0.79393700 | 1.57608700  | 2.18241800  |
| C  | 0.70681900  | 0.17979000  | 3.43637000  |

|   |             |             |            |
|---|-------------|-------------|------------|
| H | 0.62235800  | -0.80380800 | 3.90551300 |
| H | 1.34990500  | 0.12809400  | 2.55572000 |
| H | 1.18674600  | 0.84800700  | 4.16676700 |
| C | -1.72022100 | 0.56531500  | 4.16339600 |
| H | -1.86142600 | -0.49315700 | 4.39599200 |
| H | -1.37177800 | 1.05002100  | 5.08594200 |
| H | -2.66214000 | 1.02089200  | 3.86145700 |

86

I7, total electronic energy = -2986.7885472, thermal corrections to Gibbs free energy = 0.642959

|   |             |             |             |
|---|-------------|-------------|-------------|
| C | -1.36519100 | 2.11533400  | 0.19973900  |
| H | -1.28453800 | 2.54770200  | -0.80399200 |
| H | -1.79061500 | 1.11699400  | 0.05923500  |
| C | -2.33106000 | 2.93893200  | 1.06117300  |
| H | -2.45823200 | 2.50302700  | 2.05652200  |
| H | -3.31414400 | 2.94515200  | 0.57846000  |
| H | -2.00709500 | 3.97501300  | 1.18292600  |
| C | 1.31865700  | 3.41497500  | 0.35087600  |
| H | 2.18521900  | 3.43609400  | 1.02239400  |
| H | 1.70938000  | 3.25771700  | -0.65690200 |
| C | 0.57895800  | 4.75833500  | 0.39750100  |
| H | -0.25944500 | 4.77960000  | -0.30525700 |
| H | 1.26693400  | 5.56172900  | 0.10699600  |
| H | 0.19445600  | 4.99731000  | 1.39168000  |
| C | 0.35874800  | 1.75284200  | 2.61819700  |
| H | -0.44908500 | 1.05526600  | 2.87035600  |
| H | 1.29052700  | 1.25486500  | 2.90417700  |
| C | 0.22438300  | 3.04392200  | 3.43662800  |
| H | 1.05868000  | 3.72665000  | 3.24949900  |
| H | 0.23705100  | 2.80025800  | 4.50580600  |
| H | -0.70489300 | 3.57922400  | 3.23151800  |
| C | -1.30134800 | -1.69168100 | 1.06144500  |
| H | -1.42891600 | -0.90396800 | 1.81318000  |
| H | -1.69869400 | -1.28400700 | 0.12575600  |
| C | -2.11896200 | -2.93333700 | 1.44587000  |
| H | -2.05792900 | -3.71335900 | 0.68187500  |
| H | -3.17241100 | -2.65064400 | 1.53755300  |
| H | -1.80617700 | -3.36864400 | 2.39744500  |
| C | 1.26950400  | -1.89415600 | 2.54999500  |
| H | 2.33846500  | -2.08918600 | 2.41093400  |
| H | 1.19148700  | -0.87320200 | 2.93221400  |
| C | 0.69495900  | -2.87105500 | 3.58388800  |
| H | -0.33711100 | -2.62447700 | 3.84694700  |
| H | 1.28855700  | -2.81371100 | 4.50374400  |
| H | 0.72307900  | -3.90960600 | 3.24174300  |

|    |             |             |             |
|----|-------------|-------------|-------------|
| C  | 0.80483800  | -3.61579300 | 0.27617200  |
| H  | 1.88270100  | -3.80165100 | 0.33278100  |
| H  | 0.33517500  | -4.25970000 | 1.02677800  |
| C  | 0.28097300  | -3.97710700 | -1.11672200 |
| H  | -0.78794600 | -3.76496100 | -1.22267300 |
| H  | 0.42633600  | -5.04737800 | -1.30213200 |
| H  | 0.80969900  | -3.42646900 | -1.89993500 |
| C  | 3.84178000  | 0.56237500  | 1.43293900  |
| H  | 3.58179600  | 1.62200400  | 1.33810000  |
| H  | 3.14832400  | 0.14110300  | 2.16488200  |
| C  | 5.28113600  | 0.42046800  | 1.94356500  |
| H  | 5.53921900  | -0.62195700 | 2.15044800  |
| H  | 5.38962800  | 0.97643500  | 2.88218000  |
| H  | 6.01615300  | 0.82203100  | 1.23953700  |
| C  | 4.10068100  | -1.93107300 | -0.17743800 |
| H  | 3.83932700  | -2.34581100 | 0.80215100  |
| H  | 3.51757300  | -2.49073700 | -0.91372900 |
| C  | 5.59551200  | -2.14212200 | -0.45758600 |
| H  | 5.86229700  | -1.84819200 | -1.47674500 |
| H  | 5.83079700  | -3.20787000 | -0.35425100 |
| H  | 6.24167500  | -1.59506600 | 0.23257300  |
| C  | 4.55444000  | 0.67267200  | -1.38037600 |
| H  | 5.56195000  | 0.50065200  | -0.98735200 |
| H  | 4.50501000  | 0.13731600  | -2.33321800 |
| C  | 4.33014500  | 2.17192700  | -1.59074000 |
| H  | 3.34308500  | 2.36886200  | -2.01346500 |
| H  | 5.08726900  | 2.56420100  | -2.27978600 |
| H  | 4.42272400  | 2.72917400  | -0.65294000 |
| C  | -5.17879900 | -0.22421900 | 0.56105700  |
| O  | -3.60349600 | -0.76868200 | -1.46041500 |
| O  | -6.06803100 | -0.63441800 | -1.87056300 |
| O  | -4.76138300 | 1.45115600  | -1.41304100 |
| F  | -4.13151900 | 0.21412200  | 1.29076600  |
| F  | -5.37934200 | -1.51941700 | 0.87900300  |
| F  | -6.26533800 | 0.46416200  | 0.95379600  |
| P  | 0.40060300  | 1.83873800  | 0.75224100  |
| P  | 0.54607100  | -1.85733500 | 0.83157400  |
| P  | 3.39373900  | -0.19611400 | -0.21070500 |
| S  | -4.86991200 | -0.01805500 | -1.25978700 |
| Ru | 1.15881800  | -0.12339200 | -0.65787500 |
| H  | 1.49824700  | -1.42697700 | -1.53847000 |
| C  | 0.92039400  | 0.33353800  | -2.84336100 |
| O  | 1.10861900  | 1.43706100  | -2.18879400 |
| C  | -0.51138400 | -0.08134500 | -3.14432200 |



|   |             |             |             |
|---|-------------|-------------|-------------|
| H | -0.56526100 | -1.09646600 | -3.54614600 |
| H | -1.15553700 | -0.01055300 | -2.26086300 |
| H | -0.92161200 | 0.60848600  | -3.89635900 |
| C | 1.94043700  | -0.09688700 | -3.87988700 |
| H | 1.90038100  | -1.17120200 | -4.07465100 |
| H | 1.69563600  | 0.41971200  | -4.81957700 |
| H | 2.95251400  | 0.18797800  | -3.59676000 |

86

TS5, total electronic energy = -2986.7832827, thermal corrections to Gibbs free energy = 0.639512

|   |             |             |             |
|---|-------------|-------------|-------------|
| C | -1.32780600 | 2.13505400  | 0.01839700  |
| H | -1.29456100 | 2.46135100  | -1.02783100 |
| H | -1.74904700 | 1.12611200  | 0.00102800  |
| C | -2.26453100 | 3.04035600  | 0.82875900  |
| H | -2.33852100 | 2.71660400  | 1.87136300  |
| H | -3.26857300 | 2.98583500  | 0.39531700  |
| H | -1.94874100 | 4.08607900  | 0.81932500  |
| C | 1.32745800  | 3.43471500  | -0.18287200 |
| H | 2.26620500  | 3.53727500  | 0.37400800  |
| H | 1.60390200  | 3.13230200  | -1.19640000 |
| C | 0.59406000  | 4.78103700  | -0.24802500 |
| H | -0.31215500 | 4.71556400  | -0.85745800 |
| H | 1.24773700  | 5.52615900  | -0.71747600 |
| H | 0.31436800  | 5.16198700  | 0.73647900  |
| C | 0.51284800  | 2.14809500  | 2.38229900  |
| H | -0.28612900 | 1.50682000  | 2.77345400  |
| H | 1.45400500  | 1.68919400  | 2.69872900  |
| C | 0.42276000  | 3.55048000  | 2.99791400  |
| H | 1.25404600  | 4.18446000  | 2.67527000  |
| H | 0.47899400  | 3.47097200  | 4.09020700  |
| H | -0.51031300 | 4.06162200  | 2.75209400  |
| C | -1.31392200 | -1.45923800 | 1.39200900  |
| H | -1.42616500 | -0.58849900 | 2.04903900  |
| H | -1.74005100 | -1.16743800 | 0.42613300  |
| C | -2.11670700 | -2.64781700 | 1.94039000  |
| H | -2.07198000 | -3.51162100 | 1.27105300  |
| H | -3.16931300 | -2.35828100 | 2.02470900  |
| H | -1.77861500 | -2.96955500 | 2.92787500  |
| C | 1.29851300  | -1.49783800 | 2.82012800  |
| H | 2.35648600  | -1.74538200 | 2.67588500  |
| H | 1.26531800  | -0.43715300 | 3.08175300  |
| C | 0.72850600  | -2.32530900 | 3.97912100  |
| H | -0.28964500 | -2.01931100 | 4.23448600  |
| H | 1.34731000  | -2.17464700 | 4.87158600  |
| H | 0.71978500  | -3.39822900 | 3.76610600  |

|    |             |             |             |
|----|-------------|-------------|-------------|
| C  | 0.76786400  | -3.46286600 | 0.79088100  |
| H  | 1.84338600  | -3.65507000 | 0.86731200  |
| H  | 0.29423000  | -4.00613200 | 1.61487200  |
| C  | 0.23647800  | -3.98568400 | -0.54617500 |
| H  | -0.83215600 | -3.78302600 | -0.67279000 |
| H  | 0.37640900  | -5.07113600 | -0.60561500 |
| H  | 0.76421400  | -3.53512100 | -1.39184900 |
| C  | 3.86215800  | 0.71980100  | 1.34022200  |
| H  | 3.60258500  | 1.76880400  | 1.16052700  |
| H  | 3.20027200  | 0.37124500  | 2.13637800  |
| C  | 5.32125800  | 0.61349200  | 1.80097400  |
| H  | 5.58332600  | -0.40723000 | 2.09346900  |
| H  | 5.47141900  | 1.25325400  | 2.67846500  |
| H  | 6.02814900  | 0.94196500  | 1.03339100  |
| C  | 4.02095000  | -1.91876300 | -0.03284800 |
| H  | 3.79140100  | -2.23253400 | 0.99147800  |
| H  | 3.39913500  | -2.53522000 | -0.68872400 |
| C  | 5.49977700  | -2.18271700 | -0.35030900 |
| H  | 5.73027500  | -1.98485500 | -1.40098500 |
| H  | 5.72396500  | -3.23894900 | -0.16069700 |
| H  | 6.18017800  | -1.58740600 | 0.26273800  |
| C  | 4.45962400  | 0.54860700  | -1.49819900 |
| H  | 5.47807200  | 0.42964600  | -1.11326700 |
| H  | 4.39276800  | -0.09238200 | -2.38149100 |
| C  | 4.21856400  | 2.00855800  | -1.88498100 |
| H  | 3.23336000  | 2.13627200  | -2.33760700 |
| H  | 4.97446700  | 2.32516200  | -2.61327300 |
| H  | 4.29685200  | 2.67708100  | -1.02190300 |
| C  | -5.17678800 | -0.14906900 | 0.54841900  |
| O  | -3.55073000 | -0.88125400 | -1.36878200 |
| O  | -6.00041300 | -0.76534100 | -1.86341600 |
| O  | -4.68624200 | 1.34267100  | -1.55324600 |
| F  | -4.16064000 | 0.37691500  | 1.26424000  |
| F  | -5.36306600 | -1.41315700 | 0.97873700  |
| F  | -6.28702500 | 0.55051500  | 0.84291800  |
| P  | 0.46264400  | 1.94017500  | 0.52691600  |
| P  | 0.53044500  | -1.64200700 | 1.12433200  |
| P  | 3.33593800  | -0.18435700 | -0.20265400 |
| S  | -4.81488100 | -0.10601200 | -1.27351100 |
| Ru | 1.09216900  | -0.14391900 | -0.59420600 |
| H  | 1.30632500  | -1.45585500 | -1.59378700 |
| C  | 0.92309300  | -0.46117500 | -2.86762400 |
| O  | 1.09982300  | 0.79966400  | -2.55063500 |
| C  | -0.51113000 | -0.91620400 | -3.11358200 |

|   |             |             |             |
|---|-------------|-------------|-------------|
| H | -0.58471800 | -2.00281300 | -3.21041000 |
| H | -1.19184700 | -0.57942800 | -2.32616800 |
| H | -0.84974700 | -0.46399600 | -4.05605300 |
| C | 1.94240400  | -1.10428300 | -3.79962300 |
| H | 1.85815500  | -2.19408900 | -3.81094000 |
| H | 1.73561800  | -0.73826600 | -4.81413300 |
| H | 2.96131000  | -0.82043000 | -3.53940600 |

86

I8, total electronic energy = -2986.7989835, thermal corrections to Gibbs free energy = 0.649274

|   |             |             |            |
|---|-------------|-------------|------------|
| C | -1.35334500 | 0.46287400  | 2.65074300 |
| H | -2.03634100 | 1.20668400  | 2.22703800 |
| H | -1.66722800 | -0.49331500 | 2.22840300 |
| C | -1.48990700 | 0.41673400  | 4.17775600 |
| H | -0.84521100 | -0.34860000 | 4.62120600 |
| H | -2.52385800 | 0.16049400  | 4.43851800 |
| H | -1.25959200 | 1.37229300  | 4.65426700 |
| C | 0.50500800  | 2.67714700  | 1.94174700 |
| H | 1.57834000  | 2.87651900  | 2.01483100 |
| H | 0.20279900  | 2.99563100  | 0.94211100 |
| C | -0.24764700 | 3.46929800  | 3.01739500 |
| H | -1.32972400 | 3.31770500  | 2.95692900 |
| H | -0.06284100 | 4.54059300  | 2.87114000 |
| H | 0.07256400  | 3.21843200  | 4.03207900 |
| C | 1.58176000  | 0.16330800  | 3.09135200 |
| H | 1.23604900  | -0.83106700 | 3.39207100 |
| H | 2.49076000  | 0.00690700  | 2.50285200 |
| C | 1.92617600  | 1.00300000  | 4.32912600 |
| H | 2.31669100  | 1.98792900  | 4.05696800 |
| H | 2.70524400  | 0.49199900  | 4.90723700 |
| H | 1.06944200  | 1.14969300  | 4.99007100 |
| C | -0.95471000 | -3.05614700 | 1.00084300 |
| H | -1.09576300 | -2.57646600 | 1.97681400 |
| H | -1.80078900 | -2.74701400 | 0.38388400 |
| C | -0.95461200 | -4.57957800 | 1.17525600 |
| H | -0.83381300 | -5.10476400 | 0.22237100 |
| H | -1.91189500 | -4.90127800 | 1.60301200 |
| H | -0.16549700 | -4.92151800 | 1.85186900 |
| C | 1.89117700  | -2.87603100 | 1.47254600 |
| H | 2.61053100  | -2.06926800 | 1.61410200 |
| H | 1.37915900  | -2.99716600 | 2.43427000 |
| C | 2.64950300  | -4.16449700 | 1.12639100 |
| H | 1.98655900  | -5.02572700 | 1.00938300 |
| H | 3.35605900  | -4.39948600 | 1.93142700 |
| H | 3.22957900  | -4.06096200 | 0.20398900 |

|    |             |             |             |
|----|-------------|-------------|-------------|
| C  | 0.89105400  | -3.24863700 | -1.26864700 |
| H  | 1.88573000  | -2.95975200 | -1.62691400 |
| H  | 0.94779300  | -4.31019100 | -1.00958400 |
| C  | -0.14641600 | -3.03755600 | -2.37676700 |
| H  | -1.15085000 | -3.32927400 | -2.05578800 |
| H  | 0.11054600  | -3.64170700 | -3.25485900 |
| H  | -0.19694800 | -1.99261300 | -2.69851200 |
| C  | 3.96227700  | -0.70940700 | -0.33292200 |
| H  | 4.11746300  | -0.54812800 | 0.73948100  |
| H  | 3.60792000  | -1.73790400 | -0.44578400 |
| C  | 5.28651300  | -0.54443400 | -1.09164000 |
| H  | 5.18003000  | -0.80266300 | -2.14941100 |
| H  | 6.04262100  | -1.21412200 | -0.66564400 |
| H  | 5.67932600  | 0.47467400  | -1.03181900 |
| C  | 2.46091900  | 0.07312700  | -2.70754400 |
| H  | 2.78718300  | -0.96406800 | -2.84793400 |
| H  | 1.39714100  | 0.10215300  | -2.96550800 |
| C  | 3.22872900  | 1.00177600  | -3.65643000 |
| H  | 2.86925700  | 2.03282300  | -3.59161800 |
| H  | 3.08509800  | 0.66784700  | -4.69071400 |
| H  | 4.30403000  | 1.00483400  | -3.45658400 |
| C  | 3.24768100  | 2.10641800  | -0.64550100 |
| H  | 3.90426100  | 2.32859400  | -1.49194400 |
| H  | 2.37435800  | 2.75897000  | -0.72621400 |
| C  | 4.00984500  | 2.34589700  | 0.66485800  |
| H  | 3.44458300  | 2.02466100  | 1.54388200  |
| H  | 4.21884700  | 3.41546400  | 0.78187700  |
| H  | 4.97024500  | 1.82219200  | 0.68135200  |
| C  | -4.42626000 | 0.46332600  | -0.78927400 |
| O  | -1.95071300 | -0.15836700 | -0.29349800 |
| O  | -3.52304000 | -2.00054200 | -0.92474800 |
| O  | -2.74685400 | -0.37629000 | -2.66703300 |
| F  | -4.13806900 | 1.74994700  | -1.03621000 |
| F  | -4.72036500 | 0.34290700  | 0.51600200  |
| F  | -5.51509500 | 0.13236200  | -1.50023500 |
| P  | 0.31621700  | 0.81850400  | 1.88484700  |
| P  | 0.56965400  | -2.25255900 | 0.28063900  |
| P  | 2.55399100  | 0.39175100  | -0.85685600 |
| S  | -3.00669300 | -0.65329100 | -1.24099700 |
| Ru | 0.34818500  | 0.05553100  | -0.26034400 |
| O  | 0.18658100  | 1.99952800  | -1.09890900 |
| C  | -0.89712800 | 2.50241800  | -1.83896500 |
| C  | -1.55919000 | 3.68821200  | -1.11409100 |
| C  | -0.42104400 | 2.94216500  | -3.23543400 |

|   |             |            |             |
|---|-------------|------------|-------------|
| H | -1.66809000 | 1.73632400 | -1.99158200 |
| H | -0.83259300 | 4.49747800 | -0.96253500 |
| H | -1.93651400 | 3.38550200 | -0.13172600 |
| H | 0.34967400  | 3.71963600 | -3.15193900 |
| H | 0.01148600  | 2.09590800 | -3.78132000 |
| H | -1.24568800 | 3.34595000 | -3.83784800 |
| H | -2.40200100 | 4.09530200 | -1.68754600 |

105

TS6, total electronic energy = -3314.25557, thermal corrections to Gibbs free energy = 0.824398

|   |             |             |             |
|---|-------------|-------------|-------------|
| C | -0.59715400 | 2.19084100  | 2.32986400  |
| H | 0.34121600  | 2.60894200  | 1.96344900  |
| H | -1.37651700 | 2.57726900  | 1.67268400  |
| C | -0.88190400 | 2.67981700  | 3.75618700  |
| H | -1.84602100 | 2.32249100  | 4.12955600  |
| H | -0.92249300 | 3.77554400  | 3.74952800  |
| H | -0.10852600 | 2.38617000  | 4.46862600  |
| C | 1.20609300  | -0.15440100 | 2.53182100  |
| H | 1.13119100  | -1.21597700 | 2.79116600  |
| H | 1.79263500  | -0.09242300 | 1.61312800  |
| C | 1.91942200  | 0.62287800  | 3.64560600  |
| H | 2.04638600  | 1.67697500  | 3.38258800  |
| H | 2.92093300  | 0.20233100  | 3.79393200  |
| H | 1.39627300  | 0.56857100  | 4.60253600  |
| C | -1.67664900 | -0.38779900 | 3.24610500  |
| H | -2.57257600 | 0.24219500  | 3.23543000  |
| H | -1.97442900 | -1.35657700 | 2.85134700  |
| C | -1.18181000 | -0.59102000 | 4.68526300  |
| H | -0.31762600 | -1.26069600 | 4.72403200  |
| H | -1.98177200 | -1.05622400 | 5.27295200  |
| H | -0.91071000 | 0.34332600  | 5.17936100  |
| C | -1.87988300 | 2.97756100  | -1.13594100 |
| H | -1.31703700 | 3.34128900  | -0.27563400 |
| H | -1.14582900 | 2.85599000  | -1.93742700 |
| C | -2.94199400 | 4.00864300  | -1.53586700 |
| H | -3.49827000 | 3.71316900  | -2.43057300 |
| H | -2.45176100 | 4.96365000  | -1.75893700 |
| H | -3.66227500 | 4.19241300  | -0.73292700 |
| C | -3.79499900 | 1.57570100  | 0.59306200  |
| H | -3.73645300 | 0.75687500  | 1.31262200  |
| H | -3.48214200 | 2.47862400  | 1.12934900  |
| C | -5.24678600 | 1.73397600  | 0.12259600  |
| H | -5.37267300 | 2.56816700  | -0.57244600 |
| H | -5.88875800 | 1.92681900  | 0.98986500  |
| H | -5.61929000 | 0.82848700  | -0.36608800 |

|    |             |             |             |
|----|-------------|-------------|-------------|
| C  | -3.41958000 | 0.79575100  | -2.22857800 |
| H  | -3.93864600 | -0.14334600 | -2.02305000 |
| H  | -4.19715200 | 1.55089900  | -2.37581200 |
| C  | -2.56922900 | 0.68076300  | -3.49863400 |
| H  | -2.12617200 | 1.64286700  | -3.77465000 |
| H  | -3.19160300 | 0.35151900  | -4.33818300 |
| H  | -1.75457400 | -0.04164800 | -3.38761200 |
| C  | -3.68552800 | -2.01557100 | 0.68772300  |
| H  | -3.53921300 | -1.61920400 | 1.69402800  |
| H  | -4.23481000 | -1.24838700 | 0.13194300  |
| C  | -4.52724500 | -3.29615700 | 0.75769500  |
| H  | -4.81447100 | -3.65439800 | -0.23422800 |
| H  | -5.45128400 | -3.09112700 | 1.31048400  |
| H  | -4.00866000 | -4.10765100 | 1.27676500  |
| C  | -2.51054100 | -2.66288700 | -1.87475700 |
| H  | -3.46603500 | -2.16564000 | -2.06666300 |
| H  | -1.79427100 | -2.22223800 | -2.57021500 |
| C  | -2.65582000 | -4.16110600 | -2.17911100 |
| H  | -1.71306100 | -4.70327000 | -2.06985200 |
| H  | -2.98283600 | -4.28088900 | -3.21862200 |
| H  | -3.39837200 | -4.64948700 | -1.54349500 |
| C  | -1.23015200 | -3.64963800 | 0.56888700  |
| H  | -1.86980600 | -4.49176000 | 0.28992400  |
| H  | -0.28658300 | -3.77185600 | 0.03257500  |
| C  | -0.97923500 | -3.68571400 | 2.07778900  |
| H  | -0.28740300 | -2.90428300 | 2.40044400  |
| H  | -0.53820000 | -4.65119000 | 2.35117600  |
| H  | -1.90540500 | -3.57871100 | 2.65121700  |
| C  | 1.94465600  | 3.95906400  | -0.21946800 |
| O  | 0.80103300  | 1.60469900  | -0.33164200 |
| O  | 1.41885400  | 2.70098400  | -2.49198400 |
| O  | 3.21472400  | 1.80486500  | -0.98446000 |
| F  | 2.30508300  | 3.76421600  | 1.06239200  |
| F  | 0.77185300  | 4.61154300  | -0.22931400 |
| F  | 2.86483800  | 4.74237700  | -0.79934500 |
| P  | -0.50229700 | 0.35290500  | 2.00027100  |
| P  | -2.46401300 | 1.26248200  | -0.69745500 |
| P  | -2.01460900 | -2.11420100 | -0.14038900 |
| S  | 1.84493100  | 2.33345300  | -1.12685300 |
| Ru | -0.66424600 | -0.19218100 | -0.25680700 |
| O  | 1.19904100  | -1.43944900 | -0.76772200 |
| C  | 0.99384500  | -1.51345900 | -2.17928400 |
| C  | 2.06192700  | -0.80470000 | -3.02446000 |
| C  | 0.84080000  | -2.95609300 | -2.68458300 |

|   |            |             |             |
|---|------------|-------------|-------------|
| H | 0.03866700 | -0.98202200 | -2.41164200 |
| H | 3.00519100 | -1.35847000 | -3.01123900 |
| H | 2.25569600 | 0.20928500  | -2.68251700 |
| H | 1.80744300 | -3.47102300 | -2.66394000 |
| H | 0.14174600 | -3.53256000 | -2.07991700 |
| C | 4.33969900 | -2.82302400 | -0.94366500 |
| C | 5.12583600 | -1.51997700 | -1.05180600 |
| C | 4.62753600 | -0.93192700 | 1.14201000  |
| C | 3.83010200 | -2.21171300 | 1.35752300  |
| H | 5.95989800 | -1.66635400 | -1.74407200 |
| H | 5.01076200 | -3.63190100 | -0.63293000 |
| H | 3.89520100 | -3.09135200 | -1.90419700 |
| H | 5.09202100 | -0.63782900 | 2.08745600  |
| H | 3.98003400 | -0.11268800 | 0.79895700  |
| H | 4.49473100 | -2.98950000 | 1.75107700  |
| H | 3.01706800 | -2.05868100 | 2.06665500  |
| H | 4.49261500 | -0.70952300 | -1.43564700 |
| N | 3.24491800 | -2.72243400 | 0.07593000  |
| O | 5.67984500 | -1.14523300 | 0.20544700  |
| C | 2.64914700 | -4.06273500 | 0.31407700  |
| H | 1.85766500 | -3.97128400 | 1.05965500  |
| H | 2.23126800 | -4.44449500 | -0.61738400 |
| H | 3.41514600 | -4.75363300 | 0.67904500  |
| H | 2.30230200 | -2.03342100 | -0.33196700 |
| H | 0.48812800 | -2.96767900 | -3.72256800 |
| H | 1.72953300 | -0.75710700 | -4.06887600 |

86

I9, total electronic energy = -2142.6143573, thermal corrections to Gibbs free energy = 0.697521

|   |             |            |             |
|---|-------------|------------|-------------|
| C | -0.90942300 | 2.83883100 | 1.43115800  |
| H | -1.83781200 | 2.88004700 | 0.85396900  |
| H | -1.07301600 | 2.06329700 | 2.18444000  |
| C | -0.64410400 | 4.17279700 | 2.13944900  |
| H | 0.25232200  | 4.12952300 | 2.76647500  |
| H | -1.48759100 | 4.41134300 | 2.79967300  |
| H | -0.52770100 | 5.00734900 | 1.44421500  |
| C | 0.12965800  | 3.08662300 | -1.33311000 |
| H | 1.07114500  | 2.98597400 | -1.88690400 |
| H | -0.61149300 | 2.50946400 | -1.89555900 |
| C | -0.31461600 | 4.55491000 | -1.30199000 |
| H | -1.28396500 | 4.67067000 | -0.80759900 |
| H | -0.42835400 | 4.92541700 | -2.32846600 |
| H | 0.40302500  | 5.20472400 | -0.79619800 |
| C | 2.00835700  | 2.69917900 | 0.95040200  |
| H | 1.94925700  | 2.52498800 | 2.03213600  |

|   |             |             |             |
|---|-------------|-------------|-------------|
| H | 2.74853700  | 1.98860900  | 0.57360200  |
| C | 2.51173900  | 4.12217500  | 0.67426200  |
| H | 2.63032300  | 4.30548000  | -0.39828700 |
| H | 3.49657800  | 4.26069400  | 1.13753900  |
| H | 1.84864300  | 4.89110700  | 1.07681200  |
| C | -0.25970400 | -0.49045200 | 3.16611500  |
| H | 0.16836100  | 0.49875600  | 3.36777200  |
| H | -1.26196100 | -0.31105100 | 2.76547300  |
| C | -0.37239800 | -1.28914900 | 4.47292600  |
| H | -0.87945600 | -2.24659500 | 4.32353400  |
| H | -0.96495100 | -0.71806900 | 5.19816800  |
| H | 0.59769700  | -1.49224400 | 4.93189200  |
| C | 2.51572000  | -0.86241900 | 2.20516400  |
| H | 3.10882900  | -1.38870700 | 1.44845100  |
| H | 2.67766600  | 0.20491200  | 2.02779200  |
| C | 3.02179500  | -1.23098200 | 3.60583900  |
| H | 2.54301100  | -0.62961900 | 4.38387400  |
| H | 4.10054500  | -1.04266100 | 3.66864500  |
| H | 2.86210200  | -2.28678800 | 3.84507700  |
| C | 0.63732000  | -3.03102800 | 1.99316000  |
| H | 1.39083300  | -3.48010200 | 1.33742800  |
| H | 0.96411900  | -3.22605200 | 3.02037200  |
| C | -0.72423900 | -3.68974800 | 1.75034200  |
| H | -1.51405500 | -3.23886000 | 2.36077200  |
| H | -0.67821000 | -4.75540500 | 2.00422000  |
| H | -1.02789500 | -3.60532700 | 0.70354800  |
| C | 3.28251300  | 0.20958100  | -1.53547400 |
| H | 2.90303400  | 1.21688700  | -1.74295900 |
| H | 3.65249400  | 0.23450300  | -0.50417700 |
| C | 4.44152400  | -0.11261900 | -2.48677700 |
| H | 4.93531000  | -1.05284300 | -2.22495400 |
| H | 5.19979700  | 0.67815100  | -2.43051000 |
| H | 4.11826300  | -0.17873500 | -3.53050000 |
| C | 2.47325600  | -2.61371000 | -1.27234800 |
| H | 3.23147800  | -2.53162800 | -0.48409300 |
| H | 1.65506200  | -3.20466200 | -0.85154900 |
| C | 3.05095600  | -3.36765000 | -2.47902300 |
| H | 2.28426600  | -3.57018600 | -3.23286900 |
| H | 3.44520300  | -4.33686300 | -2.14980600 |
| H | 3.86787100  | -2.83163900 | -2.96799100 |
| C | 1.24670300  | -0.93483700 | -3.29296200 |
| H | 2.10475900  | -1.24769300 | -3.89679100 |
| H | 0.49819400  | -1.73214800 | -3.36980600 |
| C | 0.67174900  | 0.37085900  | -3.84878700 |



|    |             |             |             |
|----|-------------|-------------|-------------|
| H  | -0.21907300 | 0.68614800  | -3.29722200 |
| H  | 0.38365100  | 0.24223200  | -4.89894000 |
| H  | 1.40029200  | 1.18754000  | -3.80660800 |
| P  | 0.36316700  | 2.11848900  | 0.25788100  |
| P  | 0.73237300  | -1.18153100 | 1.72504300  |
| P  | 1.76131600  | -0.88600800 | -1.49177200 |
| Ru | -0.06502400 | -0.29449800 | -0.19785100 |
| H  | -0.60885400 | -1.78849100 | -0.61915700 |
| O  | -2.02366200 | 0.35902000  | -0.14200600 |
| C  | -3.17651100 | -0.42237500 | -0.33088100 |
| C  | -4.37204400 | 0.19539900  | 0.42202000  |
| C  | -3.52932600 | -0.57071400 | -1.82396000 |
| H  | -3.02733100 | -1.44249000 | 0.07153300  |
| C  | -5.67586900 | -0.59173500 | 0.20945800  |
| H  | -4.50389800 | 1.22810000  | 0.06611100  |
| H  | -4.13253700 | 0.25746600  | 1.49167400  |
| C  | -4.83010200 | -1.35790200 | -2.05315900 |
| H  | -3.62773000 | 0.43849400  | -2.25202300 |
| H  | -2.69000600 | -1.05581400 | -2.33888400 |
| C  | -6.00636000 | -0.73901900 | -1.28314900 |
| H  | -6.50500100 | -0.10270300 | 0.73689900  |
| H  | -5.57318500 | -1.59226500 | 0.65474900  |
| H  | -5.06005500 | -1.40681800 | -3.12534400 |
| H  | -4.68932100 | -2.39629700 | -1.71895600 |
| H  | -6.91086700 | -1.34638600 | -1.41584600 |
| H  | -6.23039200 | 0.25266900  | -1.70271300 |

86

TS7, total electronic energy = -2142.6062193, thermal corrections to Gibbs free energy = 0.698251

|   |             |            |             |
|---|-------------|------------|-------------|
| C | 0.82667300  | 3.30409100 | -0.05392500 |
| H | 1.89611700  | 3.29349600 | -0.28834900 |
| H | 0.32194700  | 3.14167200 | -1.00985700 |
| C | 0.44235100  | 4.67767100 | 0.50966800  |
| H | -0.62732500 | 4.74724000 | 0.73130800  |
| H | 0.66861700  | 5.45544700 | -0.23074400 |
| H | 0.99098300  | 4.92631000 | 1.42175100  |
| C | 1.95603500  | 1.62757900 | 2.11190900  |
| H | 1.61490000  | 1.02503300 | 2.96247400  |
| H | 2.68555500  | 1.00516400 | 1.58394500  |
| C | 2.65665900  | 2.89740800 | 2.61235500  |
| H | 3.04961800  | 3.49484400 | 1.78365800  |
| H | 3.50969000  | 2.62423000 | 3.24626800  |
| H | 1.99972700  | 3.53724300 | 3.20569000  |
| C | -0.95012700 | 2.23342300 | 2.04698700  |
| H | -1.64931800 | 2.76924000 | 1.39439400  |

|   |             |             |             |
|---|-------------|-------------|-------------|
| H | -1.44617300 | 1.29497700  | 2.30172000  |
| C | -0.71812200 | 3.03252300  | 3.33551600  |
| H | -0.05791900 | 2.50018100  | 4.02754200  |
| H | -1.67426900 | 3.18323800  | 3.85252400  |
| H | -0.28725700 | 4.01896300  | 3.15034400  |
| C | -2.31795400 | 1.88502300  | -1.85247100 |
| H | -1.98879900 | 2.61566500  | -1.10506600 |
| H | -1.54947500 | 1.89141300  | -2.63298900 |
| C | -3.67137300 | 2.31300000  | -2.43118900 |
| H | -4.04406500 | 1.60902200  | -3.18192200 |
| H | -3.57692000 | 3.29030800  | -2.92052500 |
| H | -4.43555500 | 2.41150300  | -1.65409200 |
| C | -3.47880700 | 0.29386700  | 0.32818000  |
| H | -3.12280100 | -0.35294300 | 1.13539100  |
| H | -3.43544700 | 1.31588800  | 0.72129500  |
| C | -4.93147000 | -0.07784900 | 0.00097500  |
| H | -5.35755300 | 0.54010800  | -0.79401700 |
| H | -5.55552000 | 0.05866900  | 0.89272000  |
| H | -5.02506900 | -1.12512000 | -0.30277500 |
| C | -2.95682200 | -0.92232600 | -2.27371300 |
| H | -2.99284700 | -1.91641000 | -1.81441300 |
| H | -3.99406500 | -0.60749800 | -2.42413400 |
| C | -2.24824000 | -1.00301200 | -3.62937200 |
| H | -2.21509400 | -0.03027500 | -4.13173700 |
| H | -2.77907900 | -1.69689400 | -4.29194400 |
| H | -1.22064600 | -1.36255900 | -3.52399900 |
| C | -0.73494800 | -1.33481500 | 2.90346000  |
| H | 0.03913500  | -0.63045800 | 3.22696600  |
| H | -1.65176900 | -0.74578100 | 2.79228400  |
| C | -0.94953600 | -2.40348400 | 3.98261700  |
| H | -1.80232900 | -3.04903000 | 3.75327500  |
| H | -1.15641800 | -1.92332400 | 4.94701100  |
| H | -0.07090000 | -3.04170600 | 4.11920700  |
| C | -1.61884100 | -3.08841900 | 0.73546400  |
| H | -2.54923800 | -2.64425300 | 1.11082900  |
| H | -1.68744100 | -3.06615000 | -0.35466600 |
| C | -1.51360100 | -4.55040100 | 1.19126400  |
| H | -0.65389900 | -5.05289000 | 0.73696000  |
| H | -2.41116200 | -5.09765000 | 0.87781100  |
| H | -1.42869500 | -4.65705900 | 2.27571800  |
| C | 1.19739600  | -2.99111300 | 1.51231200  |
| H | 0.85342500  | -3.83473300 | 2.11843300  |
| H | 1.50129800  | -3.39974700 | 0.54180100  |
| C | 2.39374700  | -2.32755800 | 2.20112000  |

|    |             |             |             |
|----|-------------|-------------|-------------|
| H  | 2.76302400  | -1.46963500 | 1.63226600  |
| H  | 3.21887500  | -3.04280000 | 2.30054400  |
| H  | 2.13954400  | -1.97929800 | 3.20797400  |
| P  | 0.48780800  | 1.74058700  | 0.93986700  |
| P  | -2.16000000 | 0.21730800  | -1.01783000 |
| P  | -0.25453300 | -1.85987500 | 1.16755000  |
| Ru | 0.12740000  | -0.26331000 | -0.46779700 |
| H  | -0.05736000 | -1.57759300 | -1.43030500 |
| O  | 0.93620900  | 0.87962700  | -2.20096700 |
| C  | 1.97580700  | 0.15353900  | -1.94433200 |
| C  | 2.28873800  | -1.00841300 | -2.89826800 |
| C  | 3.25507800  | 0.86046700  | -1.47123100 |
| H  | 1.75586000  | -0.67261000 | -0.41755800 |
| C  | 3.39797400  | -1.95168900 | -2.41697900 |
| H  | 2.62785100  | -0.51461600 | -3.82353500 |
| H  | 1.37057500  | -1.54645500 | -3.13652300 |
| C  | 4.38049400  | -0.08129500 | -1.01866300 |
| H  | 3.59774900  | 1.43352700  | -2.34744300 |
| H  | 3.01751000  | 1.58727400  | -0.69446300 |
| C  | 4.67242300  | -1.17621700 | -2.05424300 |
| H  | 3.61234400  | -2.69290300 | -3.19679900 |
| H  | 3.04679100  | -2.51010600 | -1.53918600 |
| H  | 5.28585000  | 0.50537000  | -0.81923600 |
| H  | 4.09615500  | -0.55165300 | -0.06843200 |
| H  | 5.43930800  | -1.86105400 | -1.67179800 |
| H  | 5.08638100  | -0.71650400 | -2.96324300 |

86

I10, total electronic energy = -2142.6094641, thermal corrections to Gibbs free energy = 0.697418

|   |             |            |             |
|---|-------------|------------|-------------|
| C | 1.23681400  | 3.17785700 | -0.43012600 |
| H | 2.31718000  | 3.03053900 | -0.53660800 |
| H | 0.81154900  | 2.89023500 | -1.39505300 |
| C | 0.94704200  | 4.65726600 | -0.14882200 |
| H | -0.12598500 | 4.85744400 | -0.06591600 |
| H | 1.32517300  | 5.26950100 | -0.97738300 |
| H | 1.42681100  | 5.01454100 | 0.76601200  |
| C | 1.99199800  | 1.81293300 | 2.08119500  |
| H | 1.53366300  | 1.36260500 | 2.97023900  |
| H | 2.71018700  | 1.07318600 | 1.71289500  |
| C | 2.75008500  | 3.09057300 | 2.46357200  |
| H | 3.25746800  | 3.53134900 | 1.59970100  |
| H | 3.52306400  | 2.85301200 | 3.20525000  |
| H | 2.10253600  | 3.85439400 | 2.89923900  |
| C | -0.82664000 | 2.65208800 | 1.61916200  |
| H | -1.40935000 | 3.11531300 | 0.81401400  |

|   |             |             |             |
|---|-------------|-------------|-------------|
| H | -1.43419600 | 1.81981200  | 1.98008700  |
| C | -0.63357200 | 3.64938000  | 2.76855500  |
| H | -0.09659700 | 3.19727900  | 3.60839100  |
| H | -1.61303500 | 3.96968700  | 3.14576600  |
| H | -0.09055100 | 4.54708600  | 2.46481300  |
| C | -1.93186000 | 1.71835900  | -2.32771800 |
| H | -1.59007500 | 2.53452500  | -1.68050400 |
| H | -1.11063900 | 1.53199400  | -3.02609700 |
| C | -3.19426200 | 2.14860500  | -3.08267400 |
| H | -3.57321500 | 1.36026600  | -3.74086800 |
| H | -2.97396700 | 3.01914400  | -3.71300400 |
| H | -4.00237800 | 2.43626100  | -2.40323200 |
| C | -3.36213700 | 0.64107200  | -0.00463600 |
| H | -3.11996900 | 0.11883200  | 0.92493700  |
| H | -3.23727200 | 1.70821800  | 0.21015700  |
| C | -4.82535200 | 0.35127200  | -0.36568000 |
| H | -5.14417700 | 0.85885700  | -1.27999800 |
| H | -5.47833600 | 0.69627700  | 0.44539600  |
| H | -5.00938600 | -0.71955800 | -0.49645900 |
| C | -2.83329000 | -1.05333400 | -2.31388800 |
| H | -3.02210200 | -1.93226000 | -1.68756400 |
| H | -3.81221100 | -0.66155300 | -2.60689600 |
| C | -2.05569100 | -1.46922000 | -3.56564400 |
| H | -1.84157400 | -0.61575100 | -4.21781800 |
| H | -2.64004200 | -2.19026700 | -4.14962100 |
| H | -1.10439700 | -1.94378900 | -3.31020700 |
| C | -1.04914400 | -0.75333800 | 3.05647300  |
| H | -0.22306600 | -0.09569100 | 3.34860700  |
| H | -1.86409600 | -0.09265500 | 2.74238900  |
| C | -1.50633600 | -1.58276800 | 4.26285500  |
| H | -2.41417300 | -2.15261700 | 4.04531300  |
| H | -1.73450000 | -0.91828600 | 5.10519700  |
| H | -0.73902800 | -2.28573200 | 4.60158000  |
| C | -1.93802500 | -2.74764600 | 1.09685400  |
| H | -2.83448400 | -2.13812200 | 1.26290500  |
| H | -1.87714800 | -2.91873200 | 0.01947800  |
| C | -2.08776900 | -4.10304400 | 1.80189600  |
| H | -1.26157600 | -4.77804800 | 1.55825200  |
| H | -3.01218400 | -4.58818900 | 1.46556000  |
| H | -2.14138900 | -4.01747800 | 2.89018200  |
| C | 0.77317500  | -2.83941800 | 2.18067600  |
| H | 0.25467800  | -3.52846700 | 2.85381300  |
| H | 1.12055000  | -3.43013000 | 1.32568900  |
| C | 1.96726800  | -2.22133000 | 2.91385300  |

|    |             |             |             |
|----|-------------|-------------|-------------|
| H  | 2.51861700  | -1.52685600 | 2.27356700  |
| H  | 2.66167600  | -3.00837900 | 3.23060600  |
| H  | 1.65583000  | -1.67824300 | 3.81237900  |
| P  | 0.64741800  | 1.85277000  | 0.76770800  |
| P  | -1.98800000 | 0.21169900  | -1.22172200 |
| P  | -0.47780200 | -1.62891600 | 1.50151900  |
| Ru | 0.25070800  | -0.35045100 | -0.31155300 |
| H  | 0.07442900  | -1.81820600 | -1.01913400 |
| O  | 0.99392000  | 0.56236900  | -2.19529500 |
| C  | 1.93688300  | -0.27341000 | -1.93790000 |
| C  | 2.07921200  | -1.51216500 | -2.82818700 |
| C  | 3.29688000  | 0.25872800  | -1.46994100 |
| H  | 1.65556500  | -0.80492800 | 0.36123300  |
| C  | 3.02575100  | -2.58609000 | -2.27547400 |
| H  | 2.50428500  | -1.13246200 | -3.77361100 |
| H  | 1.09476100  | -1.91851900 | -3.06182400 |
| C  | 4.26706200  | -0.81551200 | -0.95511900 |
| H  | 3.74148900  | 0.73042700  | -2.36302000 |
| H  | 3.16107100  | 1.05021900  | -0.73233800 |
| C  | 4.39935500  | -1.99371900 | -1.93023700 |
| H  | 3.13406200  | -3.39434300 | -3.00948100 |
| H  | 2.58130900  | -3.03140300 | -1.37564400 |
| H  | 5.24938200  | -0.36122000 | -0.77387600 |
| H  | 3.90727200  | -1.18875900 | 0.01196400  |
| H  | 5.05046900  | -2.76556000 | -1.50134000 |
| H  | 4.88658500  | -1.65003700 | -2.85427100 |

120

TS8, total electronic energy = -4392.4687599, thermal corrections to Gibbs free energy = 0.897913

|   |            |             |             |
|---|------------|-------------|-------------|
| C | 3.65644000 | 1.62019100  | 0.64835800  |
| H | 3.98948700 | 1.11378800  | -0.26329300 |
| H | 2.93371700 | 2.36804300  | 0.32266000  |
| C | 4.83067600 | 2.31764200  | 1.34659400  |
| H | 4.51150500 | 2.86378500  | 2.24009000  |
| H | 5.27046400 | 3.05250000  | 0.66087600  |
| H | 5.62524500 | 1.62762200  | 1.63875600  |
| C | 3.70508400 | -1.20878600 | 1.53322500  |
| H | 3.45158600 | -1.77598200 | 2.43365300  |
| H | 3.31858000 | -1.77526700 | 0.68891700  |
| C | 5.22871300 | -1.10151000 | 1.39795500  |
| H | 5.51246800 | -0.57585300 | 0.48312600  |
| H | 5.65307000 | -2.11145200 | 1.33591900  |
| H | 5.69907200 | -0.60140900 | 2.24777500  |
| C | 2.73502500 | 0.90971300  | 3.36075300  |
| H | 2.68044300 | 2.00190000  | 3.33126800  |

|   |             |             |             |
|---|-------------|-------------|-------------|
| H | 1.81235100  | 0.57287000  | 3.83804900  |
| C | 3.92852200  | 0.48568600  | 4.22639600  |
| H | 4.00755000  | -0.60194500 | 4.31445200  |
| H | 3.80150500  | 0.88521300  | 5.23991900  |
| H | 4.87831300  | 0.86418200  | 3.84161800  |
| C | 0.31043200  | 3.15736300  | 2.00007900  |
| H | 0.94240700  | 2.95306700  | 2.86863600  |
| H | 0.97956400  | 3.24411400  | 1.14378200  |
| C | -0.41882100 | 4.49405300  | 2.21502000  |
| H | -0.80748800 | 4.89840800  | 1.27988100  |
| H | 0.29232100  | 5.22911800  | 2.61142300  |
| H | -1.24565200 | 4.42737600  | 2.92429600  |
| C | -1.15261300 | 1.14029800  | 3.51755700  |
| H | -1.97390200 | 0.42474200  | 3.42288200  |
| H | -0.31376800 | 0.59493400  | 3.95541600  |
| C | -1.57072200 | 2.25919500  | 4.47983100  |
| H | -0.75198500 | 2.95495500  | 4.68392900  |
| H | -1.86801800 | 1.81634500  | 5.43797100  |
| H | -2.42442600 | 2.83535700  | 4.11039800  |
| C | -2.34001200 | 2.06377600  | 1.10231300  |
| H | -2.82753800 | 1.10869000  | 0.88203800  |
| H | -2.89107400 | 2.54012600  | 1.92161700  |
| C | -2.39871600 | 2.94554300  | -0.14999900 |
| H | -2.16394900 | 3.98873000  | 0.06940900  |
| H | -3.41277800 | 2.92535200  | -0.56649200 |
| H | -1.71367200 | 2.60767800  | -0.92778400 |
| C | 0.61428300  | -2.13547500 | 3.44075400  |
| H | 1.67699700  | -2.34607400 | 3.29771100  |
| H | 0.56161500  | -1.16058900 | 3.92955600  |
| C | -0.00441600 | -3.18875100 | 4.36937700  |
| H | -1.03418800 | -2.93856700 | 4.64013400  |
| H | 0.57373500  | -3.23794800 | 5.29993200  |
| H | -0.00502900 | -4.19070200 | 3.93102500  |
| C | -1.96185800 | -2.01496000 | 2.08800900  |
| H | -2.09213600 | -1.49928900 | 3.04369500  |
| H | -2.46795400 | -1.41296200 | 1.32815700  |
| C | -2.64604200 | -3.38774100 | 2.17416600  |
| H | -2.70858900 | -3.88070600 | 1.19968500  |
| H | -3.67502000 | -3.25099900 | 2.52906100  |
| H | -2.15174300 | -4.07448100 | 2.86558700  |
| C | 0.27972400  | -3.53241700 | 0.87551300  |
| H | -0.57952300 | -4.19391300 | 1.00987200  |
| H | 0.34617100  | -3.30054500 | -0.18739500 |
| C | 1.54640000  | -4.28232200 | 1.30817600  |

|    |             |             |             |
|----|-------------|-------------|-------------|
| H  | 2.44791400  | -3.67767100 | 1.20801600  |
| H  | 1.67456400  | -5.16503800 | 0.67109400  |
| H  | 1.48632500  | -4.63347600 | 2.34190700  |
| C  | 1.29590900  | 4.33872900  | -1.66611200 |
| O  | 0.91947600  | 1.86734700  | -0.90001300 |
| O  | -0.21260200 | 2.65260800  | -2.99174600 |
| O  | 2.26862700  | 2.28514700  | -2.97342900 |
| F  | 2.33959200  | 4.44781000  | -0.82138400 |
| F  | 0.20823400  | 4.82366300  | -1.04189400 |
| F  | 1.54308300  | 5.11857800  | -2.73075800 |
| P  | 2.65589000  | 0.34087500  | 1.57106100  |
| P  | -0.66578100 | 1.57277600  | 1.76089800  |
| P  | -0.11785600 | -1.90600600 | 1.73302000  |
| S  | 1.04090400  | 2.57507100  | -2.21455400 |
| Ru | 0.49247500  | -0.02281600 | 0.47990500  |
| O  | -3.33406100 | -0.52018200 | -0.49293000 |
| C  | -2.39005100 | -0.81376100 | -1.31518000 |
| C  | -2.27532200 | 0.04681900  | -2.58023400 |
| C  | -2.18550300 | -2.31728800 | -1.56195500 |
| H  | -1.00936500 | -0.42693100 | -0.55746800 |
| C  | -1.23790700 | -0.40344200 | -3.61472300 |
| H  | -3.27803100 | -0.02950300 | -3.03194900 |
| H  | -2.12869500 | 1.09365000  | -2.31500600 |
| C  | -1.14994600 | -2.70479900 | -2.62163100 |
| H  | -3.17921700 | -2.64954500 | -1.90203800 |
| H  | -2.00750900 | -2.82932800 | -0.61586800 |
| C  | -1.33915300 | -1.90289800 | -3.91390600 |
| H  | -1.37510800 | 0.18536100  | -4.53013900 |
| H  | -0.22873600 | -0.18672000 | -3.25609400 |
| H  | -1.22561900 | -3.78276900 | -2.81652400 |
| H  | -0.14348200 | -2.51601800 | -2.24227900 |
| H  | -0.57844300 | -2.19107100 | -4.64839600 |
| H  | -2.31888300 | -2.13458900 | -4.35928300 |
| H  | -4.78445000 | 0.07603600  | -0.82665000 |
| C  | -6.34611300 | 0.81964600  | 0.36516700  |
| C  | -6.29664600 | -0.28975700 | 1.40978100  |
| C  | -6.45944700 | -1.96052400 | -0.21825300 |
| C  | -6.53288600 | -0.94312900 | -1.35021500 |
| H  | -6.76783900 | 0.06833800  | 2.32892500  |
| H  | -7.37464400 | 1.15057700  | 0.19763300  |
| H  | -5.73480800 | 1.67306000  | 0.66696100  |
| H  | -7.04082400 | -2.84452400 | -0.49200700 |
| H  | -5.41461800 | -2.26059800 | -0.05482400 |
| H  | -7.56965700 | -0.67585100 | -1.57171500 |

|   |             |             |             |
|---|-------------|-------------|-------------|
| H | -6.05495600 | -1.32468700 | -2.25523500 |
| H | -5.25336600 | -0.55493800 | 1.63385500  |
| N | -5.82079200 | 0.32086600  | -0.95274600 |
| O | -7.02022400 | -1.43839900 | 0.98208700  |
| C | -5.92225100 | 1.36300300  | -2.01221300 |
| H | -5.50805500 | 0.96214400  | -2.93795300 |
| H | -5.35299500 | 2.23861100  | -1.69791900 |
| H | -6.97139900 | 1.62822500  | -2.15435000 |
| C | 3.10916900  | -3.26940900 | -2.09649200 |
| O | 1.66835900  | -1.40228500 | -0.98960700 |
| O | 3.94462400  | -0.79438200 | -1.86219200 |
| O | 2.06468000  | -1.28402200 | -3.45971000 |
| F | 2.01794700  | -4.05521000 | -2.13458800 |
| F | 3.80898100  | -3.58328700 | -0.99081500 |
| F | 3.87074400  | -3.56382300 | -3.16240200 |
| S | 2.65378700  | -1.46033000 | -2.12132100 |

103

TS9, total electronic energy = -3296.5481995, thermal corrections to Gibbs free energy = 0.785962

|   |             |             |             |
|---|-------------|-------------|-------------|
| C | -0.00575400 | -2.48894600 | -1.94202700 |
| H | 0.40077500  | -1.85583900 | -2.73842800 |
| H | 0.67269200  | -2.37017900 | -1.09112600 |
| C | -0.00343400 | -3.95825000 | -2.38377600 |
| H | -0.38393300 | -4.61997200 | -1.59950100 |
| H | 1.02465000  | -4.26972900 | -2.60292500 |
| H | -0.59827400 | -4.12394900 | -3.28530000 |
| C | -2.37659700 | -1.09967100 | -3.04781500 |
| H | -3.45145400 | -0.98947500 | -2.86454600 |
| H | -1.97530500 | -0.09135800 | -3.17502500 |
| C | -2.13808900 | -1.90816000 | -4.33032500 |
| H | -1.07286500 | -1.98311800 | -4.56897000 |
| H | -2.62346900 | -1.40079700 | -5.17288200 |
| H | -2.54502800 | -2.92034000 | -4.27870400 |
| C | -2.73650900 | -3.06647000 | -0.84888700 |
| H | -2.12278700 | -3.69165900 | -0.19175800 |
| H | -3.47428900 | -2.58221400 | -0.20455800 |
| C | -3.47194400 | -3.94085000 | -1.87290800 |
| H | -4.13169700 | -3.34715700 | -2.51260400 |
| H | -4.09973900 | -4.66708600 | -1.34287400 |
| H | -2.79064500 | -4.50312900 | -2.51530500 |
| C | 0.16452200  | -2.64793700 | 1.79466600  |
| H | -0.20489800 | -3.25095200 | 0.95928800  |
| H | 1.12130900  | -2.22952400 | 1.46267700  |
| C | 0.37521500  | -3.54942600 | 3.01795100  |
| H | 0.71989300  | -2.99139600 | 3.89362000  |



|    |             |             |             |
|----|-------------|-------------|-------------|
| H  | 1.13773300  | -4.30389400 | 2.79074300  |
| H  | -0.53927900 | -4.08266600 | 3.29438400  |
| C  | -2.60119200 | -2.02165900 | 2.56088000  |
| H  | -3.42846100 | -1.41552700 | 2.18699000  |
| H  | -2.66146800 | -2.97875900 | 2.03251800  |
| C  | -2.80521400 | -2.24360300 | 4.06583300  |
| H  | -2.01314800 | -2.84559500 | 4.51805000  |
| H  | -3.75237700 | -2.77238600 | 4.22618700  |
| H  | -2.86421800 | -1.29828700 | 4.61372700  |
| C  | -0.37966100 | -0.33965700 | 3.47877500  |
| H  | -0.98460700 | 0.56188900  | 3.61202300  |
| H  | -0.57977200 | -0.98413300 | 4.33923400  |
| C  | 1.10656600  | 0.02612000  | 3.44680800  |
| H  | 1.74565400  | -0.86163300 | 3.41611500  |
| H  | 1.37116900  | 0.58908300  | 4.35002500  |
| H  | 1.33751900  | 0.64724800  | 2.58178100  |
| C  | -4.58273400 | 0.09321600  | -0.00409800 |
| H  | -4.55971500 | -0.20666900 | -1.05667400 |
| H  | -4.48036000 | -0.82695600 | 0.57632100  |
| C  | -5.92548300 | 0.75976600  | 0.32206400  |
| H  | -6.03078400 | 0.95731800  | 1.39243200  |
| H  | -6.74491400 | 0.09264800  | 0.03028000  |
| H  | -6.06429400 | 1.70345200  | -0.21376800 |
| C  | -3.13441700 | 1.73205600  | 2.01883700  |
| H  | -3.46468400 | 0.88600400  | 2.63203500  |
| H  | -2.09551500 | 1.93588700  | 2.28913400  |
| C  | -3.98429400 | 2.97391600  | 2.32324200  |
| H  | -3.58965500 | 3.86503800  | 1.82633700  |
| H  | -3.96182000 | 3.16741000  | 3.40229700  |
| H  | -5.03143200 | 2.86066400  | 2.03218900  |
| C  | -3.32232300 | 2.60165400  | -0.76680400 |
| H  | -4.13962300 | 3.14911600  | -0.28658100 |
| H  | -2.42198200 | 3.21389600  | -0.66854900 |
| C  | -3.65662700 | 2.38325000  | -2.24521000 |
| H  | -2.83160500 | 1.89689200  | -2.76610900 |
| H  | -3.83742200 | 3.35261400  | -2.72527000 |
| H  | -4.56256700 | 1.78305000  | -2.37836000 |
| P  | -1.62354700 | -1.68625300 | -1.44109500 |
| P  | -1.01710600 | -1.20937600 | 1.95112800  |
| P  | -3.02784300 | 1.08056900  | 0.26889800  |
| Ru | -1.00809800 | 0.06662000  | -0.04533800 |
| O  | -0.06274700 | 1.86687800  | 0.86717300  |
| C  | 0.85431400  | 2.66859100  | 0.39987200  |
| C  | 0.50714300  | 4.16521700  | 0.47015300  |

|   |             |             |             |
|---|-------------|-------------|-------------|
| C | 2.31964300  | 2.36031000  | 0.74686600  |
| H | 0.88819000  | 2.47567000  | -0.93769700 |
| C | 1.56455500  | 5.10368200  | -0.13131400 |
| H | 0.39028900  | 4.38678900  | 1.54176600  |
| H | -0.47455300 | 4.32475700  | 0.01086900  |
| C | 3.33604900  | 3.31921800  | 0.11034500  |
| H | 2.38597600  | 2.45331400  | 1.84089800  |
| H | 2.54673700  | 1.31790500  | 0.50864500  |
| C | 2.97392300  | 4.78424600  | 0.38550700  |
| H | 1.29792700  | 6.14289900  | 0.09682200  |
| H | 1.55648100  | 5.01469800  | -1.22518000 |
| H | 4.33664300  | 3.08657700  | 0.49233000  |
| H | 3.37397200  | 3.15633900  | -0.97448600 |
| H | 3.70720500  | 5.45149900  | -0.08373300 |
| H | 3.02019100  | 4.97500400  | 1.46738300  |
| C | 0.51027700  | 1.84210900  | -2.05019200 |
| O | -0.65375900 | 1.31376100  | -1.77201600 |
| C | 0.45307400  | 2.98881200  | -3.05806100 |
| H | 0.19460600  | 2.57485200  | -4.04153300 |
| H | -0.31846500 | 3.71232700  | -2.78248700 |
| H | 1.41451000  | 3.50116500  | -3.14977600 |
| C | 1.69427800  | 0.89660100  | -2.24446000 |
| H | 1.53389100  | 0.34284800  | -3.17894000 |
| H | 2.63993600  | 1.43658700  | -2.33328000 |
| H | 1.77987100  | 0.17104300  | -1.43130000 |
| C | 5.32492600  | -0.26160100 | -0.03907700 |
| O | 3.04628400  | -1.54984500 | 0.11313700  |
| O | 4.82258800  | -2.44578100 | -1.40179500 |
| O | 5.08744800  | -2.62009100 | 1.08387900  |
| F | 5.08842800  | 0.39192500  | 1.11603200  |
| F | 4.89586100  | 0.52402900  | -1.04702500 |
| F | 6.65715700  | -0.39797600 | -0.16657100 |
| S | 4.47751200  | -1.91524100 | -0.06462500 |

103

TS10, total electronic energy = -4082.707537, thermal corrections to Gibbs free energy = 0.74921

|   |             |            |             |
|---|-------------|------------|-------------|
| C | -1.91860000 | 0.86421600 | -2.79020900 |
| H | -1.07722800 | 0.39924100 | -3.31474100 |
| H | -2.42492500 | 0.04800100 | -2.27368600 |
| C | -2.88953800 | 1.52052500 | -3.77916900 |
| H | -3.75907800 | 1.95002700 | -3.27171800 |
| H | -3.26345900 | 0.75658000 | -4.47168700 |
| H | -2.42377700 | 2.30540700 | -4.37891600 |
| C | 0.26506500  | 2.82339200 | -2.26888500 |
| H | 0.40902200  | 3.73547800 | -1.67929600 |

|   |             |             |             |
|---|-------------|-------------|-------------|
| H | 1.14489400  | 2.20354100  | -2.11053700 |
| C | 0.16623800  | 3.16343500  | -3.76124900 |
| H | 0.07557100  | 2.26046900  | -4.37044300 |
| H | 1.08660700  | 3.67296900  | -4.07186300 |
| H | -0.67064500 | 3.82461500  | -3.99622600 |
| C | -2.37206200 | 3.23217900  | -1.03500200 |
| H | -3.34049400 | 2.73658700  | -0.91334600 |
| H | -2.08802300 | 3.59965000  | -0.04742100 |
| C | -2.51415500 | 4.43906300  | -1.97326400 |
| H | -1.57745600 | 4.99711400  | -2.06055200 |
| H | -3.26386100 | 5.12522000  | -1.56147000 |
| H | -2.83928300 | 4.16117100  | -2.97746500 |
| C | -3.80883400 | -0.01908700 | 0.45497400  |
| H | -4.10539500 | 0.90400900  | -0.05446900 |
| H | -3.41856200 | -0.68125600 | -0.31656000 |
| C | -5.03813600 | -0.66784200 | 1.10827500  |
| H | -4.79729400 | -1.61819600 | 1.58946100  |
| H | -5.78343900 | -0.87741800 | 0.33174800  |
| H | -5.51322700 | -0.02694800 | 1.85281500  |
| C | -2.88132600 | 2.01778800  | 2.36825300  |
| H | -2.13871000 | 2.20132900  | 3.14905100  |
| H | -2.76739800 | 2.82025100  | 1.63789600  |
| C | -4.28706000 | 2.10146200  | 2.97739600  |
| H | -5.06647000 | 2.07560900  | 2.21137300  |
| H | -4.38852700 | 3.05361800  | 3.51148600  |
| H | -4.48604900 | 1.30237700  | 3.69728100  |
| C | -2.37592900 | -0.74242800 | 2.95255800  |
| H | -1.60114800 | -0.39080800 | 3.64244700  |
| H | -3.33433500 | -0.59722200 | 3.46306000  |
| C | -2.17442300 | -2.22862600 | 2.64573700  |
| H | -2.99078500 | -2.63547600 | 2.04649000  |
| H | -2.14160900 | -2.79669100 | 3.58283900  |
| H | -1.25026700 | -2.41826400 | 2.09817400  |
| C | 0.23426700  | 3.87244300  | 1.51968000  |
| H | 0.39390500  | 4.20768200  | 0.49016400  |
| H | -0.84570700 | 3.87783300  | 1.68351800  |
| C | 0.89622100  | 4.84417000  | 2.50566600  |
| H | 0.64902600  | 4.59944100  | 3.54265700  |
| H | 0.53401500  | 5.86120500  | 2.31539200  |
| H | 1.98584200  | 4.86157000  | 2.41239900  |
| C | 0.64087300  | 1.69103100  | 3.42051900  |
| H | -0.21686600 | 2.26366000  | 3.78680800  |
| H | 0.35790800  | 0.63981100  | 3.48261300  |
| C | 1.84220000  | 1.94666100  | 4.33975700  |

|    |             |             |             |
|----|-------------|-------------|-------------|
| H  | 2.69679700  | 1.31199300  | 4.08877700  |
| H  | 1.55685700  | 1.71460100  | 5.37274600  |
| H  | 2.17729700  | 2.98691600  | 4.31970900  |
| C  | 2.61012300  | 2.18211400  | 1.28653200  |
| H  | 3.07364900  | 2.47650600  | 2.23126200  |
| H  | 2.94005100  | 1.16469800  | 1.06438800  |
| C  | 3.09079500  | 3.13313300  | 0.18504000  |
| H  | 2.67085400  | 2.88688300  | -0.78837400 |
| H  | 4.18102700  | 3.06461400  | 0.09884700  |
| H  | 2.84720100  | 4.17570700  | 0.40882000  |
| C  | -2.84559100 | -3.30687000 | -1.40552700 |
| O  | -1.19413400 | -1.36571600 | -0.83691500 |
| O  | -0.56835300 | -3.68635100 | -0.11347800 |
| O  | -0.51546700 | -3.06340000 | -2.54616600 |
| F  | -3.46473500 | -2.49196100 | -2.27955600 |
| F  | -3.52388600 | -3.25641500 | -0.24514000 |
| F  | -2.92383700 | -4.56157400 | -1.87431600 |
| P  | -1.13114300 | 1.89476800  | -1.44714700 |
| P  | -2.33667700 | 0.44627400  | 1.51297700  |
| P  | 0.76373800  | 2.08591900  | 1.58297200  |
| S  | -1.05734400 | -2.81681700 | -1.20144600 |
| Ru | -0.32637400 | 0.46217000  | 0.28251500  |
| H  | 0.42139500  | -0.78072000 | 1.46284000  |
| H  | 1.00623000  | -1.28052100 | 1.84857300  |
| C  | 3.32849600  | -1.73682600 | 2.80631000  |
| C  | 4.04817200  | -1.97594600 | 1.48423500  |
| C  | 2.66954600  | -3.77903100 | 0.96484600  |
| C  | 1.88192100  | -3.62142500 | 2.25912700  |
| H  | 5.09872200  | -1.68555300 | 1.58403400  |
| H  | 3.86584000  | -2.26091600 | 3.61239800  |
| H  | 3.31659500  | -0.66846400 | 3.04487400  |
| H  | 2.69890100  | -4.83670600 | 0.68552500  |
| H  | 2.20041800  | -3.21613600 | 0.14998500  |
| H  | 2.30048200  | -4.28907500 | 3.02868300  |
| H  | 0.83647400  | -3.89249300 | 2.09093000  |
| H  | 3.59543100  | -1.37630300 | 0.68386800  |
| N  | 1.93097500  | -2.22388900 | 2.75386000  |
| O  | 4.02384300  | -3.35508700 | 1.13277900  |
| C  | 1.30708200  | -2.13228100 | 4.08236400  |
| H  | 0.26446000  | -2.45012100 | 4.02079100  |
| H  | 1.34816200  | -1.10100100 | 4.43972100  |
| H  | 1.82808000  | -2.77360500 | 4.80779000  |
| C  | 3.82795600  | 0.36928000  | -2.25736600 |
| O  | 1.63175400  | 0.20533300  | -0.86829800 |

|   |            |             |             |
|---|------------|-------------|-------------|
| O | 1.49960300 | -0.17607000 | -3.34573100 |
| O | 2.57259700 | -1.89758300 | -1.84853100 |
| F | 4.50506800 | 0.38120500  | -1.09546200 |
| F | 3.66833400 | 1.64141500  | -2.66366700 |
| F | 4.57821700 | -0.26432700 | -3.17160000 |
| S | 2.18522800 | -0.49646100 | -2.08095100 |

95

TS11, total electronic energy = -3104.642395, thermal corrections to Gibbs free energy = 0.728958

|   |             |             |             |
|---|-------------|-------------|-------------|
| C | -0.68079300 | -0.48280900 | 2.94669000  |
| H | -1.44687200 | 0.29250200  | 2.83466800  |
| H | -1.03470400 | -1.32547000 | 2.35047800  |
| C | -0.56294300 | -0.91012700 | 4.41472100  |
| H | 0.16066700  | -1.72092400 | 4.54451400  |
| H | -1.53433000 | -1.28501000 | 4.75960500  |
| H | -0.27499200 | -0.08965200 | 5.07582800  |
| C | 0.96784700  | 1.95580100  | 2.57833600  |
| H | 2.02311900  | 2.22555700  | 2.45784100  |
| H | 0.42398700  | 2.50035400  | 1.80217200  |
| C | 0.46277900  | 2.39010300  | 3.95958500  |
| H | -0.60153300 | 2.17147400  | 4.08882800  |
| H | 0.58663100  | 3.47467100  | 4.06684900  |
| H | 1.00834300  | 1.91483400  | 4.77822200  |
| C | 2.27587100  | -0.70022900 | 2.83951800  |
| H | 1.99503200  | -1.75848600 | 2.89897600  |
| H | 3.08551900  | -0.64065600 | 2.10972600  |
| C | 2.80581500  | -0.21032600 | 4.19370900  |
| H | 3.14482100  | 0.82876700  | 4.14024900  |
| H | 3.66953400  | -0.81909300 | 4.48718400  |
| H | 2.06468400  | -0.28411000 | 4.99187100  |
| C | 0.26071700  | -3.32887100 | 0.48172100  |
| H | 0.81537700  | -3.35817600 | 1.42789200  |
| H | -0.69112000 | -2.84598700 | 0.69897100  |
| C | 0.00333700  | -4.75419100 | -0.02566100 |
| H | -0.60003400 | -4.75769900 | -0.93691700 |
| H | -0.55389300 | -5.31382700 | 0.73527700  |
| H | 0.92365400  | -5.30603000 | -0.22969800 |
| C | 2.99145700  | -2.57697600 | -0.24614600 |
| H | 3.59307600  | -2.00646000 | -0.95982300 |
| H | 3.21440100  | -2.16955000 | 0.74268200  |
| C | 3.41569900  | -4.05121100 | -0.28738100 |
| H | 2.92129800  | -4.64088600 | 0.48943400  |
| H | 4.49555800  | -4.12182700 | -0.11020700 |
| H | 3.21386800  | -4.52124100 | -1.25431300 |
| C | 1.05976900  | -2.82005800 | -2.33875700 |

|    |             |             |             |
|----|-------------|-------------|-------------|
| H  | 1.87567100  | -2.36061600 | -2.90750500 |
| H  | 1.28441900  | -3.88984500 | -2.28363200 |
| C  | -0.26613400 | -2.60637800 | -3.07176200 |
| H  | -1.11167300 | -3.03886900 | -2.53156100 |
| H  | -0.22344400 | -3.07948300 | -4.05993900 |
| H  | -0.47755700 | -1.54399500 | -3.21994600 |
| C  | 3.99387400  | 0.97268100  | 0.07040000  |
| H  | 3.71474400  | 1.45860000  | 1.01152400  |
| H  | 4.13365100  | -0.08666700 | 0.30044800  |
| C  | 5.30959800  | 1.56157300  | -0.45397900 |
| H  | 5.67021700  | 1.02724700  | -1.33764700 |
| H  | 6.08342000  | 1.47555000  | 0.31787300  |
| H  | 5.21935500  | 2.62114400  | -0.71089500 |
| C  | 3.05355700  | 0.35249200  | -2.66531700 |
| H  | 3.68573600  | -0.50579500 | -2.41329900 |
| H  | 2.15078100  | -0.05489000 | -3.12756000 |
| C  | 3.77389900  | 1.24222500  | -3.68789200 |
| H  | 3.12642800  | 2.04297700  | -4.05697900 |
| H  | 4.06217300  | 0.63243200  | -4.55238000 |
| H  | 4.68398700  | 1.69883000  | -3.29056300 |
| C  | 2.40558600  | 2.90194700  | -1.42155600 |
| H  | 3.29077200  | 3.13094100  | -2.02157000 |
| H  | 1.52864300  | 3.03292700  | -2.06074400 |
| C  | 2.32852400  | 3.86879000  | -0.23839100 |
| H  | 1.40768700  | 3.72085500  | 0.32483800  |
| H  | 2.33612100  | 4.90098900  | -0.60936000 |
| H  | 3.18159900  | 3.76291900  | 0.44014600  |
| C  | -3.53415100 | -2.55363800 | -0.01839900 |
| O  | -1.62609200 | -0.77564000 | 0.07911300  |
| O  | -3.25567600 | -0.65379000 | -1.83312600 |
| O  | -3.96785200 | -0.02065000 | 0.49150800  |
| F  | -3.26433800 | -2.87068000 | 1.26040700  |
| F  | -2.87051700 | -3.41602100 | -0.80869300 |
| F  | -4.84758600 | -2.72603900 | -0.22671600 |
| P  | 0.82362100  | 0.17308600  | 2.04957700  |
| P  | 1.20947800  | -2.13276500 | -0.60597300 |
| P  | 2.48930300  | 1.08162500  | -1.02423400 |
| S  | -3.05587100 | -0.78903400 | -0.37806200 |
| Ru | 0.48507500  | 0.10001100  | -0.32983600 |
| H  | -0.01683400 | 0.25645900  | -2.03417300 |
| O  | -0.40172700 | 2.15439700  | -0.67698400 |
| C  | -1.73286400 | 2.59278100  | -0.46580500 |
| C  | -1.72907600 | 3.90625200  | 0.34108000  |
| C  | -2.45902100 | 2.81574400  | -1.80733200 |

|   |             |            |             |
|---|-------------|------------|-------------|
| H | -2.30794900 | 1.85438500 | 0.11095200  |
| C | -3.14394000 | 4.47663400 | 0.53854700  |
| H | -1.10867200 | 4.63884100 | -0.19537800 |
| H | -1.25331900 | 3.73934300 | 1.31476200  |
| C | -3.87622900 | 3.38504300 | -1.62464500 |
| H | -1.85570300 | 3.51365800 | -2.40734300 |
| H | -2.50437900 | 1.86823400 | -2.35614000 |
| C | -3.86232400 | 4.68179100 | -0.80267000 |
| H | -3.09380200 | 5.42221100 | 1.09369700  |
| H | -3.73129800 | 3.78376600 | 1.15843300  |
| H | -4.34257600 | 3.55831100 | -2.60309100 |
| H | -4.49901400 | 2.63956000 | -1.11091500 |
| H | -4.88647900 | 5.03951400 | -0.63580200 |
| H | -3.34465000 | 5.46702800 | -1.37296500 |
| H | -0.27790700 | 1.05109000 | -1.65309400 |

92

TS2-a, total electronic energy = -3065.364798, thermal corrections to Gibbs free energy = 0.697597

|   |             |             |             |
|---|-------------|-------------|-------------|
| C | 2.36186600  | -2.28844800 | -0.78848800 |
| H | 2.60001000  | -1.77861600 | -1.72738700 |
| H | 2.68966100  | -1.60493400 | -0.00452900 |
| C | 3.14455000  | -3.60252800 | -0.66938000 |
| H | 2.97496200  | -4.09347100 | 0.29415900  |
| H | 4.21840500  | -3.38768900 | -0.73602100 |
| H | 2.90474600  | -4.31789200 | -1.45901500 |
| C | -0.07189500 | -2.89208300 | -2.35593100 |
| H | -1.08901300 | -3.27441800 | -2.21832900 |
| H | -0.17297000 | -1.96687200 | -2.93202800 |
| C | 0.76748600  | -3.89136900 | -3.16167300 |
| H | 1.76945000  | -3.50287700 | -3.36661500 |
| H | 0.28528200  | -4.07035100 | -4.13069200 |
| H | 0.87263100  | -4.85800600 | -2.66385100 |
| C | 0.14681100  | -3.69459800 | 0.53494600  |
| H | 0.91218900  | -3.59978300 | 1.31467100  |
| H | -0.80074000 | -3.45263500 | 1.01734500  |
| C | 0.08831700  | -5.14104900 | 0.02771400  |
| H | -0.68677700 | -5.27043600 | -0.73429300 |
| H | -0.15812900 | -5.81189300 | 0.85977000  |
| H | 1.03722900  | -5.47721300 | -0.39590100 |
| C | 1.71979700  | -0.53571500 | 2.58514900  |
| H | 1.88819100  | -1.53298800 | 2.16463800  |
| H | 2.34737400  | 0.14478000  | 2.00714400  |
| C | 2.13651100  | -0.51900100 | 4.06046000  |
| H | 1.95611500  | 0.45138000  | 4.53354400  |
| H | 3.21095200  | -0.72425200 | 4.13927300  |

|   |             |             |             |
|---|-------------|-------------|-------------|
| H | 1.61695700  | -1.28357800 | 4.64499500  |
| C | -1.03212700 | -1.26953000 | 3.22934100  |
| H | -1.98316600 | -1.44189200 | 2.72526900  |
| H | -0.49399200 | -2.22403900 | 3.19629900  |
| C | -1.32781900 | -0.87676200 | 4.68398900  |
| H | -0.42550500 | -0.67546600 | 5.26581800  |
| H | -1.86183600 | -1.69735000 | 5.17774300  |
| H | -1.96868000 | 0.00830800  | 4.74089400  |
| C | -0.28921000 | 1.54780300  | 2.98438100  |
| H | -1.34042700 | 1.81760300  | 2.83189800  |
| H | -0.15085300 | 1.40867000  | 4.06068000  |
| C | 0.62026500  | 2.67937800  | 2.49576100  |
| H | 1.67702200  | 2.46001200  | 2.67712300  |
| H | 0.37929000  | 3.60628700  | 3.02920000  |
| H | 0.49730400  | 2.86700800  | 1.42622500  |
| C | -3.13823000 | -2.31912700 | 0.31601900  |
| H | -2.66761800 | -2.96157400 | -0.43574600 |
| H | -2.63701300 | -2.54066500 | 1.26012300  |
| C | -4.62533800 | -2.67240900 | 0.44552300  |
| H | -5.10360300 | -2.12680600 | 1.26385100  |
| H | -4.72623400 | -3.74195900 | 0.66475400  |
| H | -5.18818200 | -2.47399700 | -0.47110300 |
| C | -3.62681900 | 0.52321600  | 1.02082300  |
| H | -3.51706500 | 0.06704700  | 2.01166400  |
| H | -3.06621400 | 1.46158600  | 1.05578400  |
| C | -5.10474400 | 0.83464100  | 0.74706800  |
| H | -5.23684300 | 1.38852200  | -0.18706400 |
| H | -5.49662600 | 1.46289200  | 1.55578300  |
| H | -5.72782800 | -0.06147800 | 0.69721400  |
| C | -3.62584200 | -0.39834600 | -1.75548200 |
| H | -4.67849800 | -0.52944500 | -1.48716400 |
| H | -3.52022300 | 0.63084900  | -2.09893200 |
| C | -3.26745700 | -1.34997000 | -2.89881200 |
| H | -2.24754400 | -1.18001200 | -3.24543800 |
| H | -3.94575900 | -1.17514800 | -3.74272800 |
| H | -3.37008500 | -2.40172700 | -2.61370400 |
| C | 4.33784200  | 1.29380400  | -0.03979300 |
| O | 3.26117200  | 0.62814400  | -2.35837500 |
| O | 1.83071500  | 0.69540100  | -0.29294700 |
| O | 2.63250000  | 2.82812000  | -1.33498700 |
| F | 5.38512800  | 1.90295800  | -0.61574500 |
| F | 4.68175800  | 0.01997000  | 0.21658800  |
| F | 4.09158600  | 1.90191000  | 1.13474600  |
| P | 0.49616800  | -2.30519300 | -0.67525700 |



|    |             |             |             |
|----|-------------|-------------|-------------|
| P  | -0.04115800 | -0.09998800 | 2.14297900  |
| P  | -2.66227800 | -0.57580000 | -0.16073700 |
| S  | 2.84966700  | 1.37788900  | -1.15515400 |
| Ru | -0.39692900 | -0.03293900 | -0.20032500 |
| O  | -0.61482700 | 0.61076400  | -2.28921700 |
| C  | -0.63201200 | 1.73507500  | -1.63426100 |
| C  | -1.78206500 | 2.72606000  | -1.78375300 |
| H  | -0.86607000 | 1.51398200  | 0.10174300  |
| H  | -1.80992600 | 2.97232200  | -2.85670700 |
| H  | -2.74474200 | 2.26978500  | -1.54540700 |
| C  | -1.59509500 | 4.01519200  | -0.97687400 |
| H  | -1.58285800 | 3.77665400  | 0.09572900  |
| H  | -0.61319800 | 4.45121700  | -1.20775800 |
| C  | -2.68618800 | 5.05901400  | -1.24863500 |
| H  | -3.66921500 | 4.62379400  | -1.02100000 |
| H  | -2.69836600 | 5.29819500  | -2.32086200 |
| C  | -2.50029100 | 6.34671400  | -0.44143400 |
| H  | -3.29347800 | 7.07153800  | -0.65673800 |
| H  | -2.51774800 | 6.14625200  | 0.63676000  |
| H  | -1.54120900 | 6.82538700  | -0.67309400 |
| H  | 0.32704200  | 2.25044700  | -1.50203000 |

96

TS2-b1, total electronic energy = -3142.751496, thermal corrections to Gibbs free energy = 0.733348

|   |             |             |             |
|---|-------------|-------------|-------------|
| C | 1.51567000  | -1.36768200 | -1.54210600 |
| H | 1.40337100  | -0.76998800 | -2.45385800 |
| H | 1.85354800  | -0.67305700 | -0.76845700 |
| C | 2.59918900  | -2.43688500 | -1.73805000 |
| H | 2.75117900  | -3.02975100 | -0.83109200 |
| H | 3.54829000  | -1.93977200 | -1.96567900 |
| H | 2.36915100  | -3.12214800 | -2.55696600 |
| C | -1.03026600 | -2.40185300 | -2.65521000 |
| H | -1.87751600 | -3.03643300 | -2.37032800 |
| H | -1.45878900 | -1.48102400 | -3.05940600 |
| C | -0.19436100 | -3.08435800 | -3.74598300 |
| H | 0.62081300  | -2.44073300 | -4.08978200 |
| H | -0.83279700 | -3.29078700 | -4.61362800 |
| H | 0.23646400  | -4.03373600 | -3.42123100 |
| C | -0.01618400 | -3.42695200 | -0.04079800 |
| H | 0.79701700  | -3.21400500 | 0.66346600  |
| H | -0.92428800 | -3.51183100 | 0.56034300  |
| C | 0.22601600  | -4.76903000 | -0.74410700 |
| H | -0.60517900 | -5.03116500 | -1.40561600 |
| H | 0.30546700  | -5.56236600 | 0.00886500  |
| H | 1.14554800  | -4.77976900 | -1.33251300 |

|   |             |             |             |
|---|-------------|-------------|-------------|
| C | 1.33313000  | 0.06790200  | 2.03533600  |
| H | 1.65652500  | -0.96028600 | 1.83712100  |
| H | 1.62025700  | 0.64981100  | 1.15524000  |
| C | 2.07058400  | 0.63210200  | 3.25775300  |
| H | 1.83494800  | 1.68762600  | 3.42165700  |
| H | 3.14988500  | 0.56098900  | 3.08578100  |
| H | 1.84384700  | 0.08962800  | 4.17821900  |
| C | -0.93746900 | -1.53902700 | 3.02201500  |
| H | -2.02514500 | -1.53009200 | 3.15309800  |
| H | -0.71294500 | -2.38351300 | 2.36646800  |
| C | -0.25748800 | -1.75945700 | 4.37951300  |
| H | 0.82371800  | -1.88700900 | 4.27735700  |
| H | -0.65091500 | -2.67480700 | 4.83727500  |
| H | -0.44075000 | -0.94046300 | 5.08100900  |
| C | -1.05124700 | 1.30436500  | 3.27860600  |
| H | -2.09351900 | 1.09093800  | 3.53746100  |
| H | -0.46403900 | 1.12698100  | 4.18503100  |
| C | -0.91035400 | 2.76497100  | 2.84888300  |
| H | 0.11258800  | 3.00713000  | 2.54260300  |
| H | -1.17128700 | 3.42714900  | 3.68266400  |
| H | -1.57470000 | 3.00175300  | 2.01407800  |
| C | -3.49384100 | -2.36462200 | 0.55629400  |
| H | -3.21911000 | -2.86216400 | -0.38074900 |
| H | -2.70531600 | -2.59933100 | 1.27274900  |
| C | -4.82674500 | -2.92121400 | 1.07246100  |
| H | -5.08498100 | -2.51460600 | 2.05443300  |
| H | -4.74552800 | -4.00913600 | 1.18100800  |
| H | -5.65934400 | -2.72429500 | 0.39085600  |
| C | -4.16541700 | 0.31740500  | 1.65638700  |
| H | -3.79271600 | -0.19316500 | 2.55107400  |
| H | -3.73330300 | 1.32221000  | 1.67410700  |
| C | -5.69591400 | 0.42860300  | 1.71249800  |
| H | -6.09050800 | 1.02645300  | 0.88607500  |
| H | -5.98430900 | 0.93000100  | 2.64383000  |
| H | -6.19454100 | -0.54306100 | 1.69460700  |
| C | -4.65020800 | -0.33363300 | -1.12878500 |
| H | -5.54822700 | -0.82729300 | -0.74239100 |
| H | -4.89889500 | 0.72901300  | -1.18489300 |
| C | -4.31646100 | -0.87775000 | -2.51840200 |
| H | -3.44221800 | -0.37727100 | -2.94006200 |
| H | -5.16590000 | -0.71458500 | -3.19204200 |
| H | -4.11969800 | -1.95407500 | -2.49557600 |
| C | 5.39583700  | -0.29794800 | 0.72450600  |
| O | 4.54306700  | 1.83119400  | -0.53913700 |

|    |             |             |             |
|----|-------------|-------------|-------------|
| O  | 7.00035900  | 1.35975100  | -0.51474300 |
| O  | 5.46926200  | -0.06674600 | -1.88574400 |
| F  | 4.17648100  | -0.87885900 | 0.70217800  |
| F  | 5.50285700  | 0.36925500  | 1.89190200  |
| F  | 6.31275900  | -1.28212300 | 0.73155900  |
| P  | -0.22231100 | -1.87018000 | -1.05771400 |
| P  | -0.54142200 | 0.00160100  | 2.04043200  |
| P  | -3.35319000 | -0.53816600 | 0.20002700  |
| S  | 5.63020000  | 0.84084200  | -0.72455400 |
| Ru | -1.22519800 | 0.19741800  | -0.20570600 |
| O  | -1.38517800 | 0.91889500  | -2.23969100 |
| C  | -1.55946900 | 2.08579800  | -1.69578100 |
| C  | -0.36917600 | 3.06133800  | -1.69404700 |
| C  | -2.90876700 | 2.77585500  | -1.87535800 |
| H  | -1.71634200 | 1.79769000  | 0.02814000  |
| C  | -0.61068000 | 4.30793800  | -0.82334900 |
| H  | -0.34248600 | 3.39893600  | -2.74394800 |
| C  | -3.11843200 | 4.01008900  | -0.99133600 |
| H  | -2.91509500 | 3.08616400  | -2.93181900 |
| H  | -3.71393700 | 2.05378900  | -1.75989800 |
| C  | -1.94961900 | 4.99388200  | -1.12167800 |
| H  | 0.21706700  | 5.00912300  | -0.98412900 |
| H  | -0.57315000 | 4.01880500  | 0.23397100  |
| H  | -4.06260500 | 4.49542200  | -1.26527500 |
| H  | -3.21743200 | 3.69433400  | 0.05579500  |
| H  | -2.09315700 | 5.84570900  | -0.44623600 |
| H  | -1.93154100 | 5.40091800  | -2.14246100 |
| C  | 0.95863600  | 2.37788700  | -1.37987400 |
| H  | 0.90332600  | 1.85935600  | -0.41215500 |
| H  | 1.23083700  | 1.64522800  | -2.14202600 |
| H  | 1.76700500  | 3.11231100  | -1.31194600 |

96

TS2-b2, total electronic energy = -3440.493164, thermal corrections to Gibbs free energy = 0.706781

|   |             |             |             |
|---|-------------|-------------|-------------|
| C | 1.19769500  | -1.73819100 | -1.50891400 |
| H | 1.22431700  | -1.06381200 | -2.37012000 |
| H | 1.59289100  | -1.16622800 | -0.66715400 |
| C | 2.11812500  | -2.94251400 | -1.74716100 |
| H | 2.13576400  | -3.61766300 | -0.88622200 |
| H | 3.14223400  | -2.58306900 | -1.89877700 |
| H | 1.83429700  | -3.52169900 | -2.62874200 |
| C | -1.42207800 | -2.25312900 | -2.80533100 |
| H | -2.36240700 | -2.78341400 | -2.61485500 |
| H | -1.69628600 | -1.24562000 | -3.12815000 |
| C | -0.63667100 | -2.94198100 | -3.92902900 |

|   |             |             |             |
|---|-------------|-------------|-------------|
| H | 0.28028000  | -2.39627900 | -4.17078500 |
| H | -1.25052200 | -2.96415400 | -4.83764000 |
| H | -0.36567800 | -3.97224600 | -3.68918100 |
| C | -0.70792400 | -3.65471000 | -0.26786600 |
| H | 0.09631300  | -3.63877400 | 0.47726800  |
| H | -1.64440800 | -3.65004700 | 0.29410500  |
| C | -0.64291300 | -4.94616800 | -1.09389700 |
| H | -1.47096800 | -5.00957000 | -1.80628200 |
| H | -0.72392000 | -5.80909400 | -0.42217500 |
| H | 0.29177400  | -5.04698800 | -1.64897300 |
| C | 1.09767600  | -0.68607800 | 2.17180300  |
| H | 1.21720600  | -1.75359600 | 1.95205600  |
| H | 1.53257100  | -0.15222000 | 1.32691800  |
| C | 1.87777900  | -0.31610600 | 3.44072000  |
| H | 1.83777500  | 0.75800100  | 3.64338300  |
| H | 2.93122900  | -0.58230700 | 3.30095500  |
| H | 1.51758200  | -0.84060500 | 4.32877100  |
| C | -1.47491200 | -1.88784100 | 2.93461300  |
| H | -2.54923900 | -1.69329300 | 3.02317200  |
| H | -1.36468800 | -2.70526700 | 2.21801400  |
| C | -0.91606000 | -2.32780300 | 4.29387800  |
| H | 0.13614100  | -2.61812500 | 4.22785400  |
| H | -1.47333800 | -3.20298600 | 4.64813000  |
| H | -1.00972300 | -1.55127500 | 5.05842000  |
| C | -1.07240600 | 0.89565100  | 3.43617000  |
| H | -2.14671600 | 0.85356000  | 3.64468000  |
| H | -0.56692400 | 0.54239100  | 4.34023100  |
| C | -0.65599400 | 2.33674400  | 3.14100100  |
| H | 0.40551100  | 2.41526200  | 2.88488200  |
| H | -0.83093400 | 2.96329500  | 4.02334900  |
| H | -1.23332400 | 2.75684800  | 2.31398400  |
| C | -3.96195000 | -2.07580500 | 0.32161100  |
| H | -3.72294400 | -2.52276100 | -0.65004800 |
| H | -3.25391100 | -2.49454800 | 1.03764400  |
| C | -5.38685100 | -2.46245100 | 0.73772800  |
| H | -5.62495100 | -2.11600500 | 1.74739900  |
| H | -5.47717500 | -3.55499900 | 0.73784800  |
| H | -6.14720800 | -2.07395000 | 0.05397400  |
| C | -4.25656500 | 0.58200400  | 1.64069300  |
| H | -3.98898700 | -0.04427400 | 2.49862100  |
| H | -3.68466400 | 1.50870100  | 1.74714100  |
| C | -5.75624300 | 0.91012200  | 1.67287900  |
| H | -6.03363200 | 1.62142300  | 0.88986400  |
| H | -6.00010000 | 1.37407400  | 2.63572500  |

|    |             |             |             |
|----|-------------|-------------|-------------|
| H  | -6.38798700 | 0.02572000  | 1.56514800  |
| C  | -4.73229500 | 0.23297200  | -1.20210300 |
| H  | -5.69960200 | -0.17404500 | -0.88903400 |
| H  | -4.84547500 | 1.31887900  | -1.16177000 |
| C  | -4.41569700 | -0.22039500 | -2.62778300 |
| H  | -3.46877300 | 0.19764100  | -2.97607700 |
| H  | -5.21056400 | 0.11307200  | -3.30511200 |
| H  | -4.35840600 | -1.31053400 | -2.70192200 |
| C  | 4.52740100  | -0.06303300 | 0.19071300  |
| O  | 6.83189200  | 1.11822500  | -0.20773300 |
| O  | 6.67418000  | -0.62742000 | 1.57840300  |
| O  | 6.59698600  | -1.29395800 | -0.83251200 |
| F  | 4.05804700  | 0.27571400  | -1.02692200 |
| F  | 4.12415000  | 0.88130900  | 1.06348800  |
| F  | 3.93318100  | -1.22320200 | 0.54613700  |
| P  | -0.61868000 | -2.00298300 | -1.13929100 |
| P  | -0.75091200 | -0.37702000 | 2.10858200  |
| P  | -3.53133400 | -0.26948800 | 0.13871400  |
| S  | 6.37871000  | -0.23660700 | 0.18099300  |
| Ru | -1.29064400 | 0.13633600  | -0.12998700 |
| O  | -1.26699000 | 1.05536700  | -2.10428800 |
| C  | -1.27924700 | 2.15011900  | -1.40744100 |
| C  | 0.00135700  | 3.03497400  | -1.36090000 |
| C  | -2.52043700 | 3.04022200  | -1.48908800 |
| H  | -1.48301500 | 1.73876400  | 0.32221500  |
| C  | -0.06495600 | 4.16396000  | -0.30995200 |
| H  | 0.00821100  | 3.50094300  | -2.35754900 |
| C  | -2.59170300 | 4.16393400  | -0.45150400 |
| H  | -2.47319000 | 3.48271700  | -2.49622900 |
| H  | -3.40889300 | 2.41619500  | -1.46669500 |
| C  | -1.32344900 | 5.02232100  | -0.47679000 |
| H  | 0.82894200  | 4.78633700  | -0.40631000 |
| H  | -0.04531300 | 3.72437400  | 0.69187100  |
| H  | -3.47579600 | 4.78103500  | -0.64873500 |
| H  | -2.72351400 | 3.72914100  | 0.54775400  |
| H  | -1.35561900 | 5.77750200  | 0.31659200  |
| H  | -1.26917200 | 5.56532600  | -1.43006600 |
| C  | 1.33010400  | 2.30791700  | -1.28715100 |
| F  | 1.51531200  | 1.42429500  | -2.28982100 |
| F  | 1.49127500  | 1.62435300  | -0.11778800 |
| F  | 2.36453800  | 3.18101700  | -1.35378700 |

94

TS2-b3, total electronic energy = -3178.689429, thermal corrections to Gibbs free energy = 0.71286

|   |             |            |            |
|---|-------------|------------|------------|
| C | -1.06125000 | 2.65408100 | 0.50010400 |
|---|-------------|------------|------------|

|   |             |             |             |
|---|-------------|-------------|-------------|
| H | -1.79743700 | 2.32118600  | -0.23745700 |
| H | -1.18851700 | 1.99762300  | 1.36593600  |
| C | -1.36583500 | 4.09603100  | 0.92797100  |
| H | -0.69292900 | 4.44084000  | 1.71918400  |
| H | -2.38644000 | 4.14274900  | 1.32598700  |
| H | -1.30519300 | 4.80383300  | 0.09837400  |
| C | 0.53789200  | 2.78024900  | -1.99560900 |
| H | 1.57598900  | 2.93666900  | -2.30974300 |
| H | 0.18897500  | 1.89040500  | -2.52764300 |
| C | -0.32853900 | 3.98034300  | -2.39770400 |
| H | -1.37974400 | 3.82300100  | -2.13825200 |
| H | -0.28003500 | 4.11251400  | -3.48564300 |
| H | -0.00125700 | 4.91566800  | -1.93823600 |
| C | 1.77595400  | 3.42960500  | 0.65028800  |
| H | 1.43136900  | 3.47765000  | 1.68972400  |
| H | 2.75506500  | 2.94983200  | 0.67711600  |
| C | 1.93748600  | 4.84776400  | 0.08753500  |
| H | 2.30726600  | 4.83435200  | -0.94238800 |
| H | 2.67178000  | 5.39607800  | 0.68997200  |
| H | 1.00583400  | 5.41719300  | 0.10578400  |
| C | -0.27548600 | -0.05594800 | 3.07952900  |
| H | -0.29493600 | 1.03515700  | 3.18781200  |
| H | -1.09027300 | -0.31181700 | 2.39718800  |
| C | -0.52044200 | -0.72320900 | 4.43964300  |
| H | -0.59742200 | -1.81071800 | 4.35084000  |
| H | -1.47020600 | -0.36300600 | 4.85293700  |
| H | 0.26068500  | -0.50017200 | 5.17012600  |
| C | 2.59076800  | 0.66627900  | 2.93265200  |
| H | 3.54906500  | 0.32184600  | 2.52690400  |
| H | 2.43055800  | 1.66887400  | 2.53092900  |
| C | 2.67579600  | 0.74198500  | 4.46245100  |
| H | 1.77109100  | 1.17505600  | 4.89877300  |
| H | 3.51562500  | 1.38598500  | 4.74951300  |
| H | 2.84313500  | -0.23554700 | 4.92391400  |
| C | 1.86430600  | -2.07915700 | 2.82383800  |
| H | 2.91568500  | -2.18138100 | 2.53700300  |
| H | 1.84954000  | -1.98976700 | 3.91468500  |
| C | 1.08943400  | -3.32670100 | 2.40007900  |
| H | 0.03208400  | -3.26815600 | 2.67716500  |
| H | 1.51035200  | -4.21246000 | 2.89041600  |
| H | 1.14381700  | -3.48594000 | 1.31988900  |
| C | 4.26997500  | 1.07626800  | -0.44520800 |
| H | 3.84818700  | 1.93191200  | -0.98323100 |
| H | 4.15187400  | 1.29356900  | 0.61992600  |

|    |             |              |             |
|----|-------------|--------------|-------------|
| C  | 5.76080900  | 0.93770800   | -0.77798200 |
| H  | 6.24230600  | 0.16092200   | -0.17720900 |
| H  | 6.27299300  | 1.88233200   | -0.56027100 |
| H  | 5.93430500  | 0.70856000   | -1.83371300 |
| C  | 4.01248300  | -1.83717800  | -0.06347000 |
| H  | 4.39778000  | -1.49193800  | 0.90326800  |
| H  | 3.22352100  | -2.55992100  | 0.16094800  |
| C  | 5.12377700  | -2.54582700  | -0.85048200 |
| H  | 4.74112300  | -3.00195900  | -1.76838300 |
| H  | 5.54208600  | -3.35206400  | -0.23629800 |
| H  | 5.94658200  | -1.88069100  | -1.12291800 |
| C  | 3.42104100  | -0.60705100  | -2.64310000 |
| H  | 4.48100600  | -0.84916300  | -2.76678500 |
| H  | 2.86034300  | -1.49926900  | -2.93290900 |
| C  | 3.05084500  | 0.56043400   | -3.56091500 |
| H  | 1.98307700  | 0.77648600   | -3.51234400 |
| H  | 3.29836200  | 0.30492000   | -4.59823400 |
| H  | 3.60527900  | 1.47103400   | -3.31099900 |
| C  | -5.20964100 | -0.73733100  | 0.15806700  |
| O  | -3.43971200 | 0.80207500   | -1.01765000 |
| O  | -5.85053400 | 1.23588100   | -1.46705300 |
| O  | -4.87414400 | 1.79447300   | 0.77735900  |
| F  | -4.37421200 | -1.09552800  | 1.15198400  |
| F  | -5.08653400 | -1.64157000  | -0.83039100 |
| F  | -6.46511300 | -0.80178500  | 0.62894500  |
| P  | 0.61745400  | 2.23254800   | -0.21021200 |
| P  | 1.30218100  | -0.43176800  | 2.13954300  |
| P  | 3.13532400  | -0.35668300  | -0.81573500 |
| S  | -4.81654100 | 0.97437100   | -0.44880200 |
| Ru | 0.90908900  | -0.211172300 | -0.17237600 |
| O  | 0.19293600  | -0.48331900  | -2.21668300 |
| C  | -0.09795200 | -1.63390600  | -1.68306300 |
| C  | -1.44591800 | -1.68625800  | -0.94420900 |
| C  | 0.31138500  | -2.90699300  | -2.41587700 |
| H  | 0.86954200  | -1.88574400  | -0.30952200 |
| C  | -1.75873700 | -3.01431200  | -0.25857000 |
| H  | -2.22615500 | -1.45807800  | -1.68061200 |
| C  | -0.04008500 | -4.20675800  | -1.68127200 |
| H  | -0.24756300 | -2.86777400  | -3.36327300 |
| H  | 1.37059700  | -2.86414800  | -2.68011000 |
| C  | -1.49607300 | -4.20204700  | -1.19564000 |
| H  | -2.80050600 | -2.99980300  | 0.07654600  |
| H  | -1.13177800 | -3.10559600  | 0.63372000  |
| H  | 0.13831400  | -5.05633500  | -2.35049600 |

|   |             |             |             |
|---|-------------|-------------|-------------|
| H | 0.62917100  | -4.33673700 | -0.82084000 |
| H | -1.72588500 | -5.13838900 | -0.67457400 |
| H | -2.17096400 | -4.15018700 | -2.06154400 |
| O | -1.37969100 | -0.61269000 | 0.02171900  |
| H | -2.05683600 | 0.05510100  | -0.24026200 |

94

TS2-c1, total electronic energy = -3327.878668, thermal corrections to Gibbs free energy = 0.696357

|   |             |             |             |
|---|-------------|-------------|-------------|
| C | -0.97288800 | 2.39371900  | -0.71315200 |
| H | -1.37067700 | 1.85926900  | -1.58271600 |
| H | -1.33769600 | 1.84533100  | 0.15714600  |
| C | -1.52764700 | 3.82271500  | -0.66256100 |
| H | -1.17938400 | 4.36270800  | 0.22353700  |
| H | -2.62128800 | 3.77484400  | -0.60652400 |
| H | -1.26657800 | 4.41223800  | -1.54423900 |
| C | 1.36999200  | 2.37710900  | -2.53258200 |
| H | 2.44323300  | 2.60018300  | -2.51846000 |
| H | 1.26706800  | 1.38984100  | -2.99135900 |
| C | 0.62133700  | 3.40699100  | -3.38857800 |
| H | -0.44441000 | 3.17036200  | -3.46174000 |
| H | 1.02672300  | 3.39313300  | -4.40775300 |
| H | 0.71744900  | 4.42710700  | -3.01047000 |
| C | 1.61526000  | 3.52520700  | 0.20967000  |
| H | 1.00376500  | 3.62237200  | 1.11475900  |
| H | 2.59770000  | 3.18099600  | 0.54151100  |
| C | 1.77990400  | 4.89176600  | -0.46854500 |
| H | 2.43667200  | 4.83065500  | -1.34156100 |
| H | 2.24035000  | 5.59403400  | 0.23680400  |
| H | 0.82912600  | 5.32260700  | -0.78890400 |
| C | -0.54257000 | 0.63204400  | 2.69140400  |
| H | -0.48512000 | 1.72435700  | 2.60889700  |
| H | -1.25430000 | 0.31198800  | 1.92778200  |
| C | -1.08732600 | 0.23032500  | 4.06859800  |
| H | -1.24171500 | -0.85016600 | 4.14239600  |
| H | -2.06045700 | 0.71006800  | 4.22691600  |
| H | -0.43342800 | 0.53406600  | 4.88921500  |
| C | 2.33328800  | 1.19670800  | 2.96618300  |
| H | 3.33003700  | 0.78135600  | 2.78182600  |
| H | 2.27664400  | 2.12314700  | 2.39050800  |
| C | 2.17591100  | 1.51395900  | 4.45866200  |
| H | 1.23413100  | 2.02867200  | 4.66913600  |
| H | 2.98750900  | 2.17911100  | 4.77692300  |
| H | 2.22387400  | 0.61909700  | 5.08606800  |
| C | 1.43695400  | -1.50156100 | 3.21839700  |
| H | 2.51760100  | -1.67622800 | 3.20342300  |



|    |             |             |             |
|----|-------------|-------------|-------------|
| H  | 1.18169000  | -1.22550500 | 4.24602200  |
| C  | 0.69824300  | -2.78095800 | 2.82584100  |
| H  | -0.38724000 | -2.64050200 | 2.81284100  |
| H  | 0.92038500  | -3.57944100 | 3.54335100  |
| H  | 1.00526500  | -3.12863900 | 1.83502200  |
| C  | 4.50321600  | 1.22034800  | -0.09554500 |
| H  | 4.14411400  | 1.90130200  | -0.87492800 |
| H  | 4.17548900  | 1.64509000  | 0.85732900  |
| C  | 6.03469200  | 1.14721700  | -0.12906100 |
| H  | 6.43260100  | 0.56887500  | 0.70953600  |
| H  | 6.45153900  | 2.15853300  | -0.05502700 |
| H  | 6.41137900  | 0.70524600  | -1.05637200 |
| C  | 4.24822200  | -1.55258700 | 0.92416700  |
| H  | 4.36845800  | -0.98384300 | 1.85288700  |
| H  | 3.45361100  | -2.28033500 | 1.11063500  |
| C  | 5.54571600  | -2.30604600 | 0.59898200  |
| H  | 5.41897000  | -2.98392400 | -0.25017400 |
| H  | 5.83209200  | -2.91730200 | 1.46300200  |
| H  | 6.38277600  | -1.63976400 | 0.37697800  |
| C  | 4.19285500  | -1.01635600 | -1.93325500 |
| H  | 5.25329900  | -1.22896800 | -1.76719800 |
| H  | 3.70150600  | -1.97974400 | -2.10000800 |
| C  | 4.04063700  | -0.12440800 | -3.16771700 |
| H  | 2.98997700  | 0.03820600  | -3.40924600 |
| H  | 4.51671500  | -0.60697100 | -4.02973200 |
| H  | 4.52503900  | 0.84825000  | -3.03247200 |
| C  | -4.94496700 | 1.27209400  | 0.31663200  |
| O  | -5.46788500 | -1.28568400 | 0.50314100  |
| O  | -7.03484300 | 0.13822700  | -0.81633600 |
| O  | -4.75011800 | -0.38505500 | -1.71604700 |
| F  | -3.68933700 | 1.03632000  | 0.75176400  |
| F  | -5.69056900 | 1.60892300  | 1.38022700  |
| F  | -4.90203700 | 2.32781100  | -0.51515200 |
| P  | 0.87427300  | 2.10182600  | -0.75255800 |
| P  | 1.14380300  | 0.00604700  | 2.15276500  |
| P  | 3.52658800  | -0.35042000 | -0.32314000 |
| S  | -5.63262300 | -0.22506200 | -0.54243700 |
| Ru | 1.22246300  | -0.22821400 | -0.18458300 |
| C  | 0.18370700  | -4.38677400 | -1.90735900 |
| C  | 1.01778600  | -3.33718700 | -2.04000900 |
| C  | 0.58346100  | -1.98105800 | -1.63336500 |
| C  | -0.89384200 | -1.94427900 | -1.23019600 |
| C  | -1.28792300 | -3.21241400 | -0.47233300 |
| H  | 0.40623300  | -5.36825100 | -2.31681300 |

|   |             |             |             |
|---|-------------|-------------|-------------|
| H | 1.96100400  | -3.46263000 | -2.55867200 |
| O | -1.02515300 | -4.37084500 | -1.29389800 |
| H | -0.67558200 | -3.29969500 | 0.43156600  |
| H | -1.49188700 | -1.86914100 | -2.14979300 |
| O | 1.02308100  | -0.92078800 | -2.25118400 |
| O | -1.05606800 | -0.76270000 | -0.43963600 |
| H | -1.77834200 | -0.95854400 | 0.20485700  |
| C | -2.75942700 | -3.23380100 | -0.07882700 |
| H | -3.38948700 | -3.11606300 | -0.96898800 |
| H | -3.00169200 | -4.19600900 | 0.39256400  |
| O | -2.94710700 | -2.14925200 | 0.83372200  |
| H | -3.88191200 | -1.83409000 | 0.75180200  |
| H | 1.21549400  | -1.94201700 | -0.15978600 |

94

TS2-c2, total electronic energy = -3327.869526, thermal corrections to Gibbs free energy = 0.696913

|   |             |             |             |
|---|-------------|-------------|-------------|
| C | 1.88665500  | -2.05143300 | 0.37811900  |
| H | 2.50805200  | -1.26595600 | -0.05672000 |
| H | 1.64826100  | -1.71909600 | 1.39219800  |
| C | 2.69176000  | -3.35466800 | 0.46863900  |
| H | 2.13231900  | -4.14668900 | 0.97580100  |
| H | 3.60077700  | -3.17172100 | 1.05394700  |
| H | 3.00173900  | -3.73081800 | -0.50833800 |
| C | 0.75632600  | -1.93236500 | -2.36178400 |
| H | -0.09431600 | -2.33737200 | -2.91992000 |
| H | 0.78490000  | -0.86078000 | -2.58245500 |
| C | 2.06105900  | -2.57822600 | -2.84478400 |
| H | 2.93458600  | -2.14343300 | -2.35172700 |
| H | 2.17355900  | -2.39660400 | -3.92082200 |
| H | 2.08332100  | -3.65941000 | -2.69051700 |
| C | -0.44021200 | -3.71924800 | -0.27278200 |
| H | -0.22241700 | -3.95433400 | 0.77584700  |
| H | -1.52453600 | -3.62699800 | -0.34267500 |
| C | 0.01621700  | -4.87225100 | -1.17626100 |
| H | -0.21216600 | -4.67519700 | -2.22829900 |
| H | -0.51577900 | -5.78855300 | -0.89338900 |
| H | 1.08632100  | -5.07388700 | -1.09406500 |
| C | -0.13971500 | -0.72561900 | 3.34486400  |
| H | 0.25181900  | -1.73594200 | 3.17581300  |
| H | 0.61101200  | -0.03353600 | 2.95670500  |
| C | -0.32724300 | -0.47819200 | 4.84806700  |
| H | -0.62776800 | 0.55270300  | 5.05547000  |
| H | 0.62633900  | -0.64803600 | 5.36227000  |
| H | -1.06691000 | -1.14191300 | 5.30095300  |
| C | -2.53129200 | -2.18197700 | 2.39453600  |

|   |             |             |             |
|---|-------------|-------------|-------------|
| H | -3.50564600 | -2.01664700 | 1.92145700  |
| H | -2.00684900 | -2.91287700 | 1.77460500  |
| C | -2.73746700 | -2.76192200 | 3.79963300  |
| H | -1.78902100 | -3.03420600 | 4.27134200  |
| H | -3.34053900 | -3.67508100 | 3.73078000  |
| H | -3.26522600 | -2.07268200 | 4.46535000  |
| C | -2.78527800 | 0.56407100  | 3.11492600  |
| H | -3.75886500 | 0.45474100  | 2.62612600  |
| H | -2.89678500 | 0.15068500  | 4.12246400  |
| C | -2.41020100 | 2.04432000  | 3.19965300  |
| H | -1.42351100 | 2.19586200  | 3.64807300  |
| H | -3.14112500 | 2.57832800  | 3.81836000  |
| H | -2.40142500 | 2.51281100  | 2.21263500  |
| C | -3.52496600 | -2.09902500 | -1.14738100 |
| H | -2.77876100 | -2.60722300 | -1.76614100 |
| H | -3.43999600 | -2.52970100 | -0.14740000 |
| C | -4.92779100 | -2.37074800 | -1.70519900 |
| H | -5.71040100 | -1.96361300 | -1.05861400 |
| H | -5.09035900 | -3.45300300 | -1.77149900 |
| H | -5.06627400 | -1.95809900 | -2.70891800 |
| C | -4.38756400 | 0.54432100  | -0.18434000 |
| H | -4.74178100 | -0.14788200 | 0.58870500  |
| H | -3.94969100 | 1.39467600  | 0.34464100  |
| C | -5.57172900 | 1.03528000  | -1.02823800 |
| H | -5.26823700 | 1.80323500  | -1.74594300 |
| H | -6.32326700 | 1.48460200  | -0.36822800 |
| H | -6.06109500 | 0.23147400  | -1.58346400 |
| C | -3.08877300 | 0.22534700  | -2.79532800 |
| H | -4.14662200 | 0.14274100  | -3.06344400 |
| H | -2.82496300 | 1.28173400  | -2.83829400 |
| C | -2.24230900 | -0.53025700 | -3.82269300 |
| H | -1.17710900 | -0.37834400 | -3.64515000 |
| H | -2.46940800 | -0.15255200 | -4.82694700 |
| H | -2.44525800 | -1.60613800 | -3.82912500 |
| C | 5.68161100  | -0.29451200 | -0.36336900 |
| O | 3.68029900  | 0.68021200  | 1.01595000  |
| O | 5.68625200  | 2.12626500  | 0.66890100  |
| O | 4.13265100  | 1.64664600  | -1.24419100 |
| F | 4.90769600  | -1.22990900 | -0.94809200 |
| F | 6.22120800  | -0.83751300 | 0.73951600  |
| F | 6.67575100  | 0.00864300  | -1.21313800 |
| P | 0.27025400  | -2.00865800 | -0.55828900 |
| P | -1.61368600 | -0.56577200 | 2.19855200  |
| P | -2.94855000 | -0.32925300 | -1.01934600 |

|    |             |            |             |
|----|-------------|------------|-------------|
| S  | 4.69483400  | 1.22272600 | 0.05624400  |
| Ru | -0.91071900 | 0.08529500 | 0.04311000  |
| C  | -0.27334400 | 4.20309800 | 1.22368100  |
| C  | 0.78750900  | 3.39185400 | 1.21513000  |
| C  | 0.92388400  | 2.28195100 | 0.21931500  |
| C  | -0.29859000 | 2.14158500 | -0.71420500 |
| C  | -0.97943600 | 3.50423900 | -0.93840500 |
| H  | -0.43955800 | 4.97514000 | 1.96942300  |
| H  | 1.56185000  | 3.51370900 | 1.96590100  |
| O  | -1.27676700 | 4.17508300 | 0.30074200  |
| H  | -0.20349400 | 4.10101800 | -1.45180900 |
| H  | -1.50081500 | 1.59712200 | 0.43244200  |
| O  | 1.01425000  | 1.00187000 | 0.88489100  |
| H  | 1.95749500  | 0.70786400 | 0.84852200  |
| O  | -0.17422900 | 1.28137100 | -1.67344300 |
| C  | -2.27127400 | 3.59459000 | -1.74982100 |
| H  | -2.99100700 | 2.85371600 | -1.39674600 |
| H  | -2.69526100 | 4.58944900 | -1.55226400 |
| O  | -2.09615700 | 3.37721100 | -3.13872300 |
| H  | -1.50611000 | 4.06680500 | -3.47787500 |
| H  | 1.81468800  | 2.40701900 | -0.40897300 |

94

TS2-c3, total electronic energy = -3327.86389, thermal corrections to Gibbs free energy = 0.693172

|   |             |             |             |
|---|-------------|-------------|-------------|
| C | -0.04007400 | -2.59336000 | -2.04326100 |
| H | 0.42757900  | -1.94919300 | -2.79728900 |
| H | 0.60172700  | -2.53282300 | -1.15883300 |
| C | -0.07652600 | -4.04630600 | -2.53310600 |
| H | -0.52362800 | -4.71367900 | -1.78993000 |
| H | 0.94760300  | -4.39416500 | -2.71195300 |
| H | -0.63239700 | -4.15602600 | -3.46732700 |
| C | -2.25619300 | -1.01489200 | -3.19094600 |
| H | -3.31064900 | -0.76139200 | -3.03148700 |
| H | -1.72207800 | -0.06561600 | -3.28851400 |
| C | -2.08314700 | -1.81722300 | -4.48767700 |
| H | -1.02942100 | -2.02908700 | -4.69185200 |
| H | -2.46433000 | -1.22716800 | -5.32961300 |
| H | -2.62520300 | -2.76486800 | -4.47700200 |
| C | -2.86081800 | -3.04325600 | -1.07899800 |
| H | -2.32917400 | -3.68052100 | -0.36303000 |
| H | -3.62403000 | -2.51058200 | -0.50337300 |
| C | -3.55588500 | -3.89988800 | -2.14475400 |
| H | -4.16043700 | -3.28816200 | -2.82059300 |
| H | -4.23338100 | -4.60734600 | -1.65210100 |
| H | -2.85280200 | -4.48027600 | -2.74579500 |

|   |             |             |             |
|---|-------------|-------------|-------------|
| C | 0.14593700  | -2.91868400 | 1.71261000  |
| H | -0.44334300 | -3.60461200 | 1.09241400  |
| H | 0.98657600  | -2.59402500 | 1.09332900  |
| C | 0.69603300  | -3.64882900 | 2.94628600  |
| H | 1.35017000  | -3.00609700 | 3.54166400  |
| H | 1.29403300  | -4.50686600 | 2.61776000  |
| H | -0.09141500 | -4.02702900 | 3.60086200  |
| C | -2.60218000 | -2.05511900 | 2.48612200  |
| H | -3.16063200 | -1.16597600 | 2.80019000  |
| H | -3.09329400 | -2.42408000 | 1.58296100  |
| C | -2.68499300 | -3.12613000 | 3.58124200  |
| H | -2.25787700 | -4.07735000 | 3.25248200  |
| H | -3.73779000 | -3.30894700 | 3.82628000  |
| H | -2.18255600 | -2.82541800 | 4.50501500  |
| C | -0.32944700 | -0.64496600 | 3.54013000  |
| H | -1.05983600 | 0.12895800  | 3.80012100  |
| H | -0.40056400 | -1.41536900 | 4.31504100  |
| C | 1.08183300  | -0.05106900 | 3.52641600  |
| H | 1.83785800  | -0.78896900 | 3.24108200  |
| H | 1.33820600  | 0.31329700  | 4.52782500  |
| H | 1.16195500  | 0.79410600  | 2.83702300  |
| C | -4.24989500 | 0.27560100  | 0.18124200  |
| H | -4.27395900 | -0.05287300 | -0.86322100 |
| H | -4.16777200 | -0.62951800 | 0.78643600  |
| C | -5.54606100 | 1.01860800  | 0.52963700  |
| H | -5.59939900 | 1.26635400  | 1.59352100  |
| H | -6.40433900 | 0.37701500  | 0.29916700  |
| H | -5.66503300 | 1.94317100  | -0.04300800 |
| C | -2.67284100 | 1.93426800  | 2.08753900  |
| H | -3.07324000 | 1.15218500  | 2.74218000  |
| H | -1.62324500 | 2.06077900  | 2.36774000  |
| C | -3.41998700 | 3.25524700  | 2.31827000  |
| H | -2.96469700 | 4.07991200  | 1.76229000  |
| H | -3.37163000 | 3.51267000  | 3.38259800  |
| H | -4.47512200 | 3.20138000  | 2.04006300  |
| C | -2.87806300 | 2.66200000  | -0.74401500 |
| H | -3.71546800 | 3.22473600  | -0.31959700 |
| H | -1.99502100 | 3.29864500  | -0.65632500 |
| C | -3.14990500 | 2.37702800  | -2.22273800 |
| H | -2.29749400 | 1.88804700  | -2.69598800 |
| H | -3.32877000 | 3.32289400  | -2.74691300 |
| H | -4.03472900 | 1.75021300  | -2.37008900 |
| C | 3.54768800  | -1.48459400 | -0.36622600 |
| O | 5.59779700  | 0.11572800  | -0.08842400 |

|    |             |             |             |
|----|-------------|-------------|-------------|
| O  | 5.62989200  | -2.08899200 | 1.09628700  |
| O  | 5.90084900  | -2.00048400 | -1.39023200 |
| F  | 3.11987000  | -0.85533200 | -1.48085200 |
| F  | 2.89515600  | -0.92703000 | 0.68098200  |
| F  | 3.14810700  | -2.76920600 | -0.44784100 |
| P  | -1.63749300 | -1.73056900 | -1.58486100 |
| P  | -0.93397600 | -1.40968700 | 1.95248200  |
| P  | -2.63942400 | 1.18732300  | 0.37250500  |
| S  | 5.39370700  | -1.34812400 | -0.16289900 |
| Ru | -0.77456500 | -0.07730300 | 0.00367000  |
| C  | 2.31154900  | 4.09806500  | 1.49975400  |
| C  | 2.23932100  | 5.22142600  | 0.77983800  |
| C  | 1.46783400  | 5.29245000  | -0.50667600 |
| C  | 1.24492800  | 3.87648500  | -1.04201200 |
| C  | 0.77096200  | 2.94602000  | 0.09108600  |
| H  | 2.87816900  | 4.00944800  | 2.42151300  |
| H  | 2.75764500  | 6.10960300  | 1.12570300  |
| O  | 1.69825100  | 2.91518900  | 1.18930300  |
| H  | -0.19299600 | 3.31125800  | 0.46052000  |
| H  | 2.20932500  | 3.50859000  | -1.42797100 |
| O  | 2.19746700  | 6.08974700  | -1.43901000 |
| H  | 1.67116800  | 6.10412700  | -2.25300400 |
| O  | 0.26886600  | 3.94451900  | -2.07028000 |
| H  | 0.01257600  | 3.02236900  | -2.26582200 |
| C  | 0.68149900  | 1.50769700  | -0.42593500 |
| H  | 1.65985000  | 1.01038300  | -0.34831900 |
| H  | 0.06458500  | 0.92311300  | 1.00885500  |
| O  | -0.01410500 | 1.27924400  | -1.52985100 |
| H  | 0.47392000  | 5.74110800  | -0.33857600 |

10

acetone, total electronic energy = -193.0890976, thermal corrections to Gibbs free energy = 0.055311

|   |             |             |             |
|---|-------------|-------------|-------------|
| C | 0.00000000  | 0.18315700  | -0.00000200 |
| O | -0.00001800 | 1.40456700  | 0.00000000  |
| C | -1.28679300 | -0.61458200 | -0.00000800 |
| H | -1.32614600 | -1.26725300 | 0.88024900  |
| H | -2.14962400 | 0.05451600  | -0.00020000 |
| H | -1.32598600 | -1.26762800 | -0.87998200 |
| C | 1.28680300  | -0.61455500 | 0.00000400  |
| H | 1.32605300  | -1.26751400 | 0.88004500  |
| H | 1.32615000  | -1.26730900 | -0.88018900 |
| H | 2.14964300  | 0.05453200  | 0.00011600  |

12

iPrOH, total electronic energy = -194.2883561, thermal corrections to Gibbs free energy = 0.080559

|   |             |            |             |
|---|-------------|------------|-------------|
| H | -0.00000300 | 0.07190800 | -1.46987700 |
|---|-------------|------------|-------------|

|   |             |             |             |
|---|-------------|-------------|-------------|
| C | 0.00002100  | 0.03912000  | -0.37300300 |
| O | -0.00017500 | 1.41764400  | 0.02297400  |
| C | 1.27091200  | -0.66689000 | 0.09940500  |
| H | 1.31735000  | -1.69465700 | -0.27776800 |
| H | 2.16038200  | -0.13173100 | -0.24873200 |
| H | 1.30422000  | -0.70998400 | 1.19588500  |
| C | -1.27076500 | -0.66717700 | 0.09939800  |
| H | -1.31709900 | -1.69489300 | -0.27790800 |
| H | -1.30393700 | -0.71038700 | 1.19587200  |
| H | -2.16026000 | -0.13199200 | -0.24861400 |
| H | -0.00026000 | 1.43026700  | 0.99254800  |

18

NMM, total electronic energy = -326.9765668, thermal corrections to Gibbs free energy = 0.132577

|   |             |             |             |
|---|-------------|-------------|-------------|
| C | 0.10497100  | 0.32295200  | 1.19939600  |
| C | 0.10497100  | -1.20226200 | 1.17187000  |
| C | 0.10497100  | -1.20226200 | -1.17187000 |
| C | 0.10497100  | 0.32295200  | -1.19939600 |
| H | 0.65682100  | -1.60169300 | 2.02832200  |
| H | 1.14979400  | 0.68313400  | 1.27782200  |
| H | -0.43359400 | 0.67277400  | 2.08819500  |
| H | 0.65682100  | -1.60169300 | -2.02832200 |
| H | -0.93262000 | -1.57154400 | -1.22116800 |
| H | 1.14979400  | 0.68313400  | -1.27782200 |
| H | -0.43359400 | 0.67277400  | -2.08819500 |
| H | -0.93262000 | -1.57154400 | 1.22116800  |
| N | -0.55500800 | 0.84494200  | 0.00000000  |
| O | 0.74578700  | -1.70143200 | 0.00000000  |
| C | -0.60142300 | 2.30080700  | 0.00000000  |
| H | -1.13734000 | 2.65523300  | -0.88731000 |
| H | -1.13734000 | 2.65523300  | 0.88731000  |
| H | 0.40188300  | 2.76794100  | 0.00000000  |

8

TfO, total electronic energy = -961.5586032, thermal corrections to Gibbs free energy = -0.005115

|   |             |             |             |
|---|-------------|-------------|-------------|
| C | -0.94383000 | -0.00012200 | 0.00018400  |
| O | 1.24065400  | -1.27997800 | -0.66999200 |
| O | 1.23987900  | 1.22029700  | -0.77361300 |
| O | 1.24118500  | 0.06003400  | 1.44319900  |
| F | -1.43389000 | -1.05828200 | 0.67549800  |
| F | -1.43389100 | -0.05580000 | -1.25390500 |
| F | -1.43375500 | 1.11390800  | 0.57881000  |
| S | 0.91269100  | -0.00003300 | -0.00009300 |

27

TfO-HNMM, total electronic energy = -1289.013626, thermal corrections to Gibbs free energy = 0.160943

|   |             |             |             |
|---|-------------|-------------|-------------|
| C | -2.25721800 | -0.77861100 | -0.18300600 |
|---|-------------|-------------|-------------|

|   |             |             |             |
|---|-------------|-------------|-------------|
| O | -0.97164600 | 0.75940300  | 1.52703300  |
| O | -0.50997200 | 1.03855700  | -0.90431200 |
| O | -2.69716400 | 1.80900500  | 0.03023500  |
| F | -3.20086200 | -1.09283000 | 0.71790900  |
| F | -1.29974200 | -1.72521900 | -0.12965700 |
| F | -2.81090500 | -0.81690600 | -1.40458000 |
| S | -1.54715200 | 0.89968700  | 0.17125200  |
| C | 2.41887700  | 0.36730900  | 1.19470900  |
| C | 2.03088700  | -1.10000900 | 1.34022600  |
| C | 2.33710500  | -1.51465800 | -0.93883300 |
| C | 2.76990800  | -0.08016200 | -1.21592100 |
| H | 2.33692500  | -1.44865400 | 2.32998900  |
| H | 3.48722800  | 0.51142300  | 1.37485400  |
| H | 1.83971000  | 0.99384900  | 1.87523400  |
| H | 2.84989000  | -2.18271400 | -1.63548200 |
| H | 1.25231700  | -1.61984200 | -1.09005800 |
| H | 3.85347800  | 0.02831000  | -1.12463400 |
| H | 2.45147900  | 0.24678900  | -2.20825400 |
| H | 0.94158400  | -1.21351000 | 1.25288000  |
| N | 2.14479000  | 0.84587900  | -0.20733500 |
| O | 2.69625300  | -1.91356800 | 0.37891100  |
| C | 2.57701400  | 2.25967800  | -0.40460600 |
| H | 2.31928700  | 2.56389600  | -1.41977200 |
| H | 2.05208800  | 2.88610000  | 0.31769800  |
| H | 3.65488100  | 2.32817500  | -0.25129300 |
| H | 1.10641500  | 0.83616100  | -0.37324200 |

19

sub, total electronic energy = -310.9662831, thermal corrections to Gibbs free energy = 0.143995

|   |             |             |             |
|---|-------------|-------------|-------------|
| O | -2.39282200 | -0.09978100 | -0.12869500 |
| C | -1.03641200 | -0.01811000 | 0.31988300  |
| C | -0.31522000 | -1.27187000 | -0.17493500 |
| C | -0.34348800 | 1.25316400  | -0.18605200 |
| H | -1.00902100 | -0.01351200 | 1.42386300  |
| C | 1.17078400  | -1.25628300 | 0.21602300  |
| H | -0.41313700 | -1.31398300 | -1.26874200 |
| H | -0.81432700 | -2.16225700 | 0.22604800  |
| C | 1.14211900  | 1.28165200  | 0.20753100  |
| H | -0.44189300 | 1.28364400  | -1.28010600 |
| H | -0.86206700 | 2.13782600  | 0.20823600  |
| C | 1.87181400  | 0.01923600  | -0.27668700 |
| H | 1.67072000  | -2.14588400 | -0.18564000 |
| H | 1.25858600  | -1.31660900 | 1.31015300  |
| H | 1.62073300  | 2.18077100  | -0.19889300 |
| H | 1.22648100  | 1.35071800  | 1.30148300  |



|   |             |            |             |
|---|-------------|------------|-------------|
| H | 2.91542800  | 0.03188600 | 0.06124700  |
| H | 1.89667000  | 0.01597800 | -1.37579300 |
| H | -2.84317600 | 0.70292600 | 0.17313000  |

17

prod, total electronic energy = -309.7640792, thermal corrections to Gibbs free energy = 0.120448

|   |             |             |             |
|---|-------------|-------------|-------------|
| O | 2.31222600  | 0.00000100  | -0.33650800 |
| C | 1.15737800  | 0.00000100  | 0.06313300  |
| C | 0.39321800  | -1.28434300 | 0.33777800  |
| C | 0.39321600  | 1.28434400  | 0.33777300  |
| C | -1.02007100 | -1.26528000 | -0.28197400 |
| H | 0.30126500  | -1.37478100 | 1.43042100  |
| H | 0.98678900  | -2.13151900 | -0.01805000 |
| C | -1.02007700 | 1.26527900  | -0.28196800 |
| H | 0.30127200  | 1.37479000  | 1.43041700  |
| H | 0.98678400  | 2.13151900  | -0.01806400 |
| C | -1.79286700 | -0.00000300 | 0.11344700  |
| H | -1.56433700 | -2.16473000 | 0.02718400  |
| H | -0.93236600 | -1.30915600 | -1.37580600 |
| H | -1.56434400 | 2.16472400  | 0.02719900  |
| H | -0.93238000 | 1.30916400  | -1.37580100 |
| H | -2.78011700 | -0.00000400 | -0.36354700 |
| H | -1.96515600 | -0.00000600 | 1.19898000  |

18

sub-a, total electronic energy = -272.8656185, thermal corrections to Gibbs free energy = 0.133123

|   |             |             |             |
|---|-------------|-------------|-------------|
| O | -3.15940700 | -0.17923700 | -0.07811000 |
| C | -1.92147900 | 0.52581200  | 0.01217300  |
| C | -0.70311300 | -0.39543500 | -0.03300500 |
| H | -1.90745400 | 1.21076300  | -0.84396300 |
| H | -0.75455800 | -1.09347500 | 0.81587300  |
| H | -0.75800200 | -1.00425100 | -0.94521800 |
| C | 0.62654700  | 0.36757400  | 0.01125600  |
| H | 0.67298300  | 1.06578000  | -0.83684400 |
| H | 0.66195800  | 0.98710000  | 0.91896500  |
| C | 1.85755000  | -0.54734900 | -0.02200200 |
| H | 1.82253700  | -1.16766000 | -0.92815400 |
| H | 1.81330000  | -1.24378700 | 0.82667700  |
| C | 3.18116100  | 0.22152100  | 0.01824100  |
| H | 4.04011900  | -0.45860600 | -0.00629700 |
| H | 3.27207400  | 0.90157100  | -0.83739900 |
| H | 3.26247000  | 0.82566700  | 0.92999300  |
| H | -1.88829800 | 1.14677600  | 0.92235500  |
| H | -3.20587100 | -0.76872500 | 0.68891000  |

16

prod-a, total electronic energy = -271.658422, thermal corrections to Gibbs free energy = 0.109078

|   |             |             |             |
|---|-------------|-------------|-------------|
| O | 3.04498100  | -0.17045000 | -0.41379800 |
| C | 2.06766900  | -0.22787000 | 0.30843200  |
| C | 0.81374600  | 0.58601100  | 0.13519800  |
| H | 0.73136200  | 1.24048600  | 1.01643600  |
| H | 0.91992200  | 1.21946000  | -0.75167900 |
| C | -0.44292200 | -0.30149900 | 0.05268500  |
| H | -0.36824000 | -0.95232800 | -0.82863200 |
| H | -0.47565500 | -0.96513100 | 0.92749400  |
| C | -1.74143700 | 0.51138900  | -0.01938500 |
| H | -1.70056700 | 1.18244600  | -0.88780400 |
| H | -1.80995900 | 1.15805800  | 0.86592000  |
| C | -2.99089100 | -0.36855200 | -0.11099300 |
| H | -3.90194200 | 0.23832800  | -0.15873400 |
| H | -2.96658300 | -1.00189400 | -1.00585800 |
| H | -3.07694300 | -1.02920200 | 0.76004200  |
| H | 2.05176400  | -0.92349400 | 1.17758200  |

22

sub-b1, total electronic energy = -350.2594154, thermal corrections to Gibbs free energy = 0.170137

|   |             |             |             |
|---|-------------|-------------|-------------|
| O | 1.65689800  | -1.62040000 | -0.06128600 |
| C | 0.55465800  | -0.77644600 | 0.29348300  |
| C | 0.69887500  | 0.64417600  | -0.28897800 |
| C | -0.78056400 | -1.41999400 | -0.10294100 |
| H | 0.60404700  | -0.70608500 | 1.38956200  |
| C | -0.51586500 | 1.50819500  | 0.10516300  |
| H | 0.69513100  | 0.53846400  | -1.38688700 |
| C | -1.98231900 | -0.54841800 | 0.28956400  |
| H | -0.78048500 | -1.57316500 | -1.19314200 |
| H | -0.84968200 | -2.41282400 | 0.35731200  |
| C | -1.85244400 | 0.86629700  | -0.29172600 |
| H | -0.41961700 | 2.50151800  | -0.35133600 |
| H | -0.49860800 | 1.66545000  | 1.19402500  |
| H | -2.91422500 | -1.01921900 | -0.04625800 |
| H | -2.04113400 | -0.48550900 | 1.38549100  |
| H | -2.68696400 | 1.49404400  | 0.04452400  |
| H | -1.92009100 | 0.81533900  | -1.38782000 |
| H | 1.64054800  | -1.71166500 | -1.02658700 |
| C | 2.01889100  | 1.30071300  | 0.12796200  |
| H | 2.87316700  | 0.67628700  | -0.14897000 |
| H | 2.14071600  | 2.28000000  | -0.34911800 |
| H | 2.05462500  | 1.45342900  | 1.21432500  |

20

prod-b1, total electronic energy = -349.0575549, thermal corrections to Gibbs free energy = 0.146724

|   |            |            |             |
|---|------------|------------|-------------|
| O | 1.24072700 | 1.75460000 | -0.37063500 |
| C | 0.44703300 | 0.94119200 | 0.07921100  |

|   |             |             |             |
|---|-------------|-------------|-------------|
| C | 0.83653300  | -0.50290500 | 0.38851100  |
| C | -1.00077900 | 1.30331400  | 0.36745900  |
| C | -0.17460400 | -1.47051600 | -0.27771200 |
| H | 0.71131000  | -0.61098600 | 1.47786900  |
| C | -1.97904200 | 0.30506600  | -0.28620000 |
| H | -1.13734100 | 1.27463100  | 1.45814800  |
| H | -1.17934500 | 2.32939100  | 0.03298500  |
| C | -1.62830600 | -1.14109800 | 0.08420600  |
| H | 0.07223300  | -2.49718600 | 0.01742300  |
| H | -0.04740000 | -1.41719100 | -1.36825500 |
| H | -3.00430800 | 0.54699200  | 0.01587100  |
| H | -1.93417900 | 0.42247900  | -1.37718100 |
| H | -2.30630400 | -1.83457600 | -0.42752000 |
| H | -1.77912200 | -1.28959900 | 1.16259400  |
| C | 2.28469600  | -0.81396300 | 0.01469500  |
| H | 2.98086700  | -0.13672300 | 0.51790700  |
| H | 2.54063900  | -1.84036300 | 0.29827500  |
| H | 2.44395700  | -0.71020800 | -1.06406100 |

22

sub-b2, total electronic energy = -648.0064941, thermal corrections to Gibbs free energy = 0.143755

|   |             |             |             |
|---|-------------|-------------|-------------|
| O | -0.01891200 | 2.27646100  | -0.07279700 |
| C | 0.60942200  | 1.04128800  | 0.26154000  |
| C | -0.10169600 | -0.18468700 | -0.35877600 |
| C | 2.09548900  | 1.04602800  | -0.11709400 |
| H | 0.51968100  | 0.96880400  | 1.35209200  |
| C | 0.60177800  | -1.49355800 | 0.06289400  |
| H | -0.06008500 | -0.09477800 | -1.45283100 |
| C | 2.80335600  | -0.25483000 | 0.28535200  |
| H | 2.17615300  | 1.19009400  | -1.20481400 |
| H | 2.56846000  | 1.91312900  | 0.35732500  |
| C | 2.08999100  | -1.47592600 | -0.30801000 |
| H | 0.10239000  | -2.34417000 | -0.40984900 |
| H | 0.49267900  | -1.62096500 | 1.14792200  |
| H | 3.85010700  | -0.22747200 | -0.03893000 |
| H | 2.81495300  | -0.33732500 | 1.38098600  |
| H | 2.56321200  | -2.40190700 | 0.03863600  |
| H | 2.18913800  | -1.46065000 | -1.40225700 |
| H | 0.01901100  | 2.37155600  | -1.03702000 |
| C | -1.57887800 | -0.22746800 | -0.00840500 |
| F | -2.29138400 | 0.76363800  | -0.59027400 |
| F | -1.79549700 | -0.13687100 | 1.32894200  |
| F | -2.15769400 | -1.39044500 | -0.41132200 |

20

prod-b2, total electronic energy = -646.8013638, thermal corrections to Gibbs free energy = 0.120483

|   |             |             |             |
|---|-------------|-------------|-------------|
| O | 0.06363700  | 2.07295000  | 0.38506500  |
| C | 0.62190200  | 1.09946100  | -0.08969300 |
| C | -0.11286500 | -0.20957000 | -0.40675000 |
| C | 2.10306900  | 1.06864600  | -0.40600900 |
| C | 0.60031800  | -1.40699300 | 0.27137900  |
| H | -0.06138800 | -0.34966100 | -1.49467900 |
| C | 2.79799400  | -0.14582700 | 0.24620700  |
| H | 2.20583900  | 0.99698100  | -1.49822400 |
| H | 2.54529700  | 2.01517800  | -0.08389100 |
| C | 2.08435000  | -1.45509100 | -0.10963000 |
| H | 0.09496800  | -2.33237200 | -0.01974200 |
| H | 0.49791900  | -1.30775900 | 1.35887400  |
| H | 3.84528800  | -0.17682200 | -0.07278300 |
| H | 2.79978800  | -0.01428900 | 1.33592000  |
| H | 2.56302700  | -2.29596600 | 0.40451400  |
| H | 2.17789200  | -1.64539100 | -1.18730900 |
| C | -1.58655500 | -0.15691400 | -0.05561500 |
| F | -2.24158300 | 0.82407500  | -0.71321900 |
| F | -1.80258100 | 0.02708100  | 1.26643400  |
| F | -2.20328200 | -1.32179800 | -0.38905300 |

20

sub-b3, total electronic energy = -386.1824933, thermal corrections to Gibbs free energy = 0.146477

|   |             |             |             |
|---|-------------|-------------|-------------|
| O | -1.81874700 | -1.45897300 | 0.06685200  |
| C | -0.65298200 | -0.71942900 | -0.29637500 |
| C | -0.65998600 | 0.70229400  | 0.27805400  |
| C | 0.62802100  | -1.46563300 | 0.10585400  |
| H | -0.70078400 | -0.63657700 | -1.39023000 |
| C | 0.61388300  | 1.46456600  | -0.11665200 |
| H | -0.69666800 | 0.61653100  | 1.38012500  |
| C | 1.90204600  | -0.70252400 | -0.28389800 |
| H | 0.61209400  | -1.61645400 | 1.19590300  |
| H | 0.61017400  | -2.46156200 | -0.35120000 |
| C | 1.89078900  | 0.71915300  | 0.29472300  |
| H | 0.58707900  | 2.46490500  | 0.33570500  |
| H | 0.59949600  | 1.60747900  | -1.20580600 |
| H | 2.78722000  | -1.25057800 | 0.06019300  |
| H | 1.97254800  | -0.64771200 | -1.37922700 |
| H | 2.77379400  | 1.27720100  | -0.03836600 |
| H | 1.94767400  | 0.66651200  | 1.39100700  |
| H | -1.82498100 | -1.52113200 | 1.03439900  |
| O | -1.83092600 | 1.36394600  | -0.19952200 |
| H | -1.80088600 | 2.27103700  | 0.13861700  |

18

prod-b3, total electronic energy = -384.9774032, thermal corrections to Gibbs free energy = 0.123269

|   |             |             |             |
|---|-------------|-------------|-------------|
| O | 1.32457900  | 1.70170400  | -0.39691000 |
| C | 0.50943800  | 0.92821800  | 0.07410500  |
| C | 0.83888500  | -0.53017900 | 0.38589900  |
| C | -0.92221400 | 1.32623300  | 0.39101200  |
| C | -0.18533200 | -1.45613500 | -0.30511900 |
| H | 0.71624400  | -0.64208100 | 1.47848300  |
| C | -1.93601800 | 0.37018600  | -0.27388600 |
| H | -1.05053200 | 1.28101400  | 1.48176900  |
| H | -1.07156000 | 2.36302700  | 0.07672800  |
| C | -1.62879500 | -1.09338800 | 0.06732000  |
| H | 0.03797700  | -2.49420400 | -0.02857600 |
| H | -0.04201600 | -1.37141700 | -1.39033400 |
| H | -2.95025500 | 0.63758900  | 0.04265300  |
| H | -1.89588100 | 0.50716800  | -1.36244800 |
| H | -2.32445000 | -1.75769400 | -0.45790100 |
| H | -1.78311800 | -1.25999000 | 1.14221800  |
| O | 2.17132600  | -0.80193700 | -0.00642300 |
| H | 2.34056900  | -1.73116000 | 0.20808900  |

20

sub-c, total electronic energy = -535.3724801, thermal corrections to Gibbs free energy = 0.129834

|   |             |             |             |
|---|-------------|-------------|-------------|
| C | -1.18942400 | 1.89071000  | -0.03540600 |
| C | -2.02216400 | 0.86015100  | 0.14208000  |
| C | -1.51313900 | -0.54156000 | 0.31363100  |
| C | -0.08003700 | -0.62860300 | -0.21433900 |
| C | 0.75658100  | 0.55111000  | 0.30539400  |
| H | -1.52502100 | 2.91320300  | -0.18304800 |
| H | -3.09295500 | 1.03510300  | 0.15746000  |
| O | 0.17373600  | 1.81861600  | -0.05827900 |
| H | 0.81240300  | 0.49136600  | 1.40184000  |
| H | -0.12612400 | -0.56116900 | -1.31439200 |
| O | -2.37545000 | -1.43924000 | -0.38794300 |
| H | -1.99346800 | -2.32231100 | -0.26943100 |
| O | 0.45309900  | -1.87777100 | 0.20087400  |
| H | 1.41943000  | -1.81658800 | 0.09091200  |
| C | 2.16601100  | 0.59333800  | -0.28151800 |
| H | 2.09601200  | 0.65659700  | -1.37567800 |
| H | 2.68352000  | 1.49089100  | 0.08217400  |
| O | 2.85420800  | -0.59537100 | 0.12668600  |
| H | 3.66277600  | -0.66928400 | -0.40090300 |
| H | -1.48828100 | -0.81855000 | 1.38130900  |

18

prod-c1, total electronic energy = -534.1736564, thermal corrections to Gibbs free energy = 0.107292

|   |            |            |             |
|---|------------|------------|-------------|
| C | 1.34181300 | 1.78907500 | -0.00576800 |
| C | 2.13076600 | 0.69295600 | -0.05859100 |

|   |             |             |             |
|---|-------------|-------------|-------------|
| C | 1.56386500  | -0.64741100 | 0.03515100  |
| C | 0.06457800  | -0.67332300 | 0.36867800  |
| C | -0.64572100 | 0.52388700  | -0.28742100 |
| H | 1.73617000  | 2.80169600  | 0.01803200  |
| H | 3.20694100  | 0.80901700  | -0.12182300 |
| O | -0.00046600 | 1.78242700  | 0.02393700  |
| H | -0.60844300 | 0.39131200  | -1.37791500 |
| H | -0.00574600 | -0.55522300 | 1.46721900  |
| O | 2.22143500  | -1.67647300 | -0.06795500 |
| O | -0.49805200 | -1.89182800 | -0.06307600 |
| H | -1.46345400 | -1.75866300 | -0.03941500 |
| C | -2.09060200 | 0.70527300  | 0.17175900  |
| H | -2.10650500 | 0.84913700  | 1.26009600  |
| H | -2.51060200 | 1.60248000  | -0.30155700 |
| O | -2.82034100 | -0.46572100 | -0.20866800 |
| H | -3.65717300 | -0.46974700 | 0.27860300  |

18

prod-c2, total electronic energy = -534.1575395, thermal corrections to Gibbs free energy = 0.104781

|   |             |             |             |
|---|-------------|-------------|-------------|
| C | -1.03961900 | 1.86911500  | -0.18094400 |
| C | -1.92476700 | 0.95667700  | 0.23186300  |
| C | -1.53363900 | -0.47535400 | 0.52372800  |
| C | -0.12587400 | -0.69016100 | -0.00863000 |
| C | 0.83953200  | 0.46028800  | 0.25797400  |
| H | -1.31011800 | 2.88913200  | -0.43844200 |
| H | -2.96694500 | 1.23549600  | 0.34650600  |
| O | 0.30237000  | 1.66475700  | -0.33771500 |
| H | 0.89298700  | 0.61446700  | 1.34684700  |
| O | -2.43341800 | -1.39575500 | -0.06284000 |
| H | -1.87083800 | -2.04586700 | -0.52139000 |
| O | 0.15131900  | -1.68649700 | -0.65255500 |
| C | 2.24183900  | 0.25534700  | -0.31058800 |
| H | 2.17345800  | -0.10596000 | -1.34015300 |
| H | 2.75027300  | 1.22871600  | -0.32248700 |
| O | 2.96400700  | -0.72043900 | 0.42284300  |
| H | 3.20527700  | -0.32672100 | 1.27462900  |
| H | -1.49316400 | -0.64127100 | 1.61620800  |

18

prod-c3, total electronic energy = -534.1584644, thermal corrections to Gibbs free energy = 0.105788

|   |             |             |             |
|---|-------------|-------------|-------------|
| C | -1.02278400 | 1.92518800  | -0.08047100 |
| C | -1.90120100 | 0.93153100  | 0.08240100  |
| C | -1.46922600 | -0.49187100 | 0.29626600  |
| C | -0.01972800 | -0.65622800 | -0.16299100 |
| C | 0.83231400  | 0.51428600  | 0.36594000  |
| H | -1.30761900 | 2.95739400  | -0.25973500 |

|   |             |             |             |
|---|-------------|-------------|-------------|
| H | -2.96321300 | 1.15126900  | 0.05210800  |
| O | 0.33924200  | 1.79558900  | -0.04863300 |
| H | 0.84459100  | 0.46852800  | 1.46777200  |
| H | -0.00910900 | -0.62988400 | -1.26332700 |
| O | -2.34008900 | -1.35270900 | -0.43607300 |
| H | -2.03259800 | -2.25649500 | -0.26682100 |
| O | 0.45954900  | -1.89426700 | 0.33217100  |
| H | 1.39611100  | -1.94922000 | 0.07674400  |
| C | 2.26877400  | 0.44470400  | -0.11293800 |
| H | 2.73827000  | 1.42168400  | -0.33823600 |
| O | 2.88038400  | -0.60073500 | -0.24310900 |
| H | -1.50801000 | -0.75195000 | 1.36740000  |
